# Supplementary material for: SnCl 4 -catalyzed solvent-free acetolysis of 2,7-anhydrosialic acid derivatives
Source: publisher site journal article supplement (doi:10.3762/bjoc.15.295), 2019-12-23
Supplement: Additional file 1 [file 1860-5397-15-295-S1.pdf]

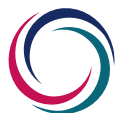

## Supporting Information

for

### **SnCl<sub>4</sub>-catalyzed solvent-free acetolysis of 2,7-anhydrosialic acid derivatives**

Kesatebrhan Haile Asressu and Cheng-Chung Wang

*Beilstein J. Org. Chem.* **2019**, *15*, 2990–2999. doi:10.3762/bjoc.15.295

**Experimental section and spectroscopic data for compounds described herein**

# Table of contents

|                      | page |
|----------------------|------|
| Experimental section | S2   |
| NMR spectra          | S22  |
| References           | S87  |

## Experimental section

**General information.** All dry solvents and chemicals were purchased from commercial sources, and were used without further purification unless otherwise mentioned. All moisture-sensitive reactions were conducted in flame-dried glassware under a dry nitrogen atmosphere. Flash column chromatography was carried out as recommended with Silica Gel 60 (230–400 mesh, Merck). TLC was performed on precoated glass plates of Silica Gel 60 F<sub>254</sub> (0.25 mm, E. Merck); detection was executed by UV (254 nm) or spraying with a solution of Ce(NH<sub>4</sub>)<sub>2</sub>(NO<sub>3</sub>)<sub>6</sub>, (NH<sub>4</sub>)<sub>6</sub>MnO<sub>24</sub>, as well as H<sub>2</sub>SO<sub>4</sub> in water and subsequent heating on a hot plate. Specific rotations were measured on a Jasco P-2000 digital polarimeter using a 100 mm cell at 589 nm and at ambient temperature conditions and reported in 10<sup>-1</sup>·deg·cm<sup>2</sup>·g<sup>-1</sup>; the sample concentrations are given in g·dL<sup>-1</sup>. <sup>1</sup>H and <sup>13</sup>C NMR spectra were recorded with Bruker AVIII-400, AV500 or N600 MHz instruments. Chemical shifts are in ppm from Me<sub>4</sub>Si, generated from the CDCl<sub>3</sub> lock signals at δ 7.24 for <sup>1</sup>H spectra and 77.16 for <sup>13</sup>C spectra, respectively. Multiplicities are reported by using the following abbreviations: s = singlet, d = doublet, t = triplet, q = quartet, m = multiplet, br = broad; *J* = coupling constant values in Hertz. Proton peaks were assigned based on 2D NMR spectra (COSY, HSQC, HMBC, and NOESY). Mass spectra were obtained with a JEOL JMS-700 mass spectrometer in FAB mode or Waters Premier XE mass spectrometer in ESI mode. IR spectra were taken with a Perkin-Elmer Paragon 1000 FT-IR spectrometer.

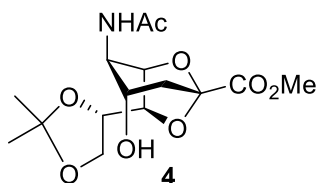

**Methyl 5-acetamido-2,7-anhydro-3,5-dideoxy-8,9-O-isopropylidene-β-glycero-α-D-galacto-2-nonulopyranosidonate (4):** To a solution of **2** in CH<sub>3</sub>CN, 2,2-dimethoxypropane (625 μL, 5.1 mmol, 3 equiv) and camphorsulfonic acid (80 mg, 0.33 mmol, 0.2 equiv) were added at room temperature and stirred for 8 h. When reaction was completed, the mixture neutralized with trimethylamine (Et<sub>3</sub>N) and concentrated in vacuo. The crude product was purified by column chromatography (60% EtOAc in hexane) to afford the desired product **4** as pale yellow solid (366.2 mg, 63% yield). [α]<sup>28</sup><sub>D</sub> +6 (c = 1.1, CHCl<sub>3</sub>); mp 150.6-152 °C; IR (CHCl<sub>3</sub>) ν 3312, 2987, 1752, 1655, 1540, 1440, 1373, 1265, 1206, 1157, 1088, 1073, 1051, 840, 742 cm<sup>-1</sup>; <sup>1</sup>H NMR (500 MHz, CDCl<sub>3</sub>): δ = 6.15 (d, *J* = 8.5 Hz, 1H, NH), 4.55 (s, 1H, H-6), 4.50 (d, *J* = 8.8 Hz, 1H, H-7), 4.10-4.05 (overlap, 2H, H-5, H-9a), 3.96-3.89 (overlap, 3H, H-4, H-8, H-9b), 3.81 (s, 3H, OCH<sub>3</sub>), 3.41 (d, *J* = 4.9 Hz, 1H, 4-OH), 2.14 (d, *J* = 3.4 Hz, 2H, H-3eq, H-3ax), 1.99 (s, 3H, NAc), 1.38, 1.29 (each s, 6H, CH<sub>3</sub>) ppm; <sup>13</sup>C NMR (125 MHz, CDCl<sub>3</sub>): δ = 170.0 (CO), 167.3 (CO), 110.0 (C), 104.2 (C-2), 79.0 (CH), 78.3 (CH), 75.3 (CH), 67.3 (CH<sub>2</sub>), 67.1 (CH), 53.3 (OCH<sub>3</sub>), 52.0 (CH), 35.8 (CH<sub>2</sub>), 27.1 (CH<sub>3</sub>), 25.4 (CH<sub>3</sub>), 23.4 (CH<sub>3</sub>); HRMS (ESI): *m/z* calcd for C<sub>15</sub>H<sub>23</sub>NO<sub>8</sub> ([M+Na]<sup>+</sup>): 368.1321, found: 368.1317.

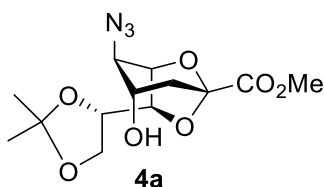

**Methyl 2,7-anhydro-5-azido-3,5-dideoxy-8,9-O-isopropylidene-β-glycero-α-D-galacto-2-nonulopyranosidonate (4a):** To a solution of **3** (176 mg, 0.61 mmol, 1 equiv in 5 mL CH<sub>3</sub>CN), 2,2-dimethoxypropane (224 μL, 1.83 mmol, 3 equiv) and CSA (21 mg, 0.09 mmol, 0.2 equiv) were added at rt and stirred for 2 h at the same temperature. When the reaction was complete, the mixture neutralized with Et<sub>3</sub>N and concentrated in vacuo. The crude product was purified by column chromatography (30% EtOAc in hexane) to afford the desired product **4a** as pale yellow compound (201.2 mg, quant.).  $[\alpha]^{28}_{\text{D}} +40.42$  ( $c = 0.58$ , CHCl<sub>3</sub>); IR (CHCl<sub>3</sub>)  $\nu$  3481, 2987, 2102, 1753, 1440, 1373, 1261, 1155, 1096, 1072, 1049, 841, 741 cm<sup>-1</sup>; <sup>1</sup>H NMR (500 MHz, CDCl<sub>3</sub>):  $\delta$  = 4.76 (br s, 1H, H-6), 4.29 (d,  $J = 9.4$  Hz, 1H, H-7), 4.10-4.03 (overlap, 2H, H-4, H-9a), 4.01-3.98 (m, 1H, H-8), 3.93 (dd,  $J = 4.5, 8.8$  Hz, 1H, H-9b), 3.81 (s, 3H, OCH<sub>3</sub>), 3.54 (br d,  $J = 1.2$  Hz, 1H, H-5), 2.58 (d,  $J = 7.0$  Hz, 1H, 4-OH), 2.32 (dd,  $J = 5.3, 15.4$  Hz, 1H, H-3eq), 2.15 (d,  $J = 15.2$  Hz, 1H, H-3ax), 1.40, 1.32 (each s, 6H, CH<sub>3</sub>) ppm; <sup>13</sup>C NMR (125 MHz, CDCl<sub>3</sub>):  $\delta$  = 166.8 (CO), 110.1 (C), 104.3 (C-2), 78.7 (CH), 78.6 (CH), 74.9 (CH), 67.62 (CH), 67.1 (CH<sub>2</sub>), 61.3 (CH), 53.3 (OCH<sub>3</sub>), 36.4 (CH<sub>2</sub>), 27.13 (CH<sub>3</sub>), 25.3 (CH<sub>3</sub>) ppm; HRMS (ESI):  $m/z$  calcd for C<sub>13</sub>H<sub>19</sub>N<sub>3</sub>O<sub>7</sub> ([M+H]<sup>+</sup>): 330.1301, found: 330.1293.

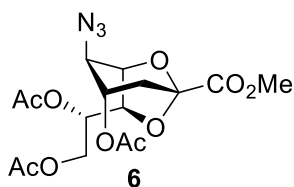

**Methyl 4,8,9-tri-O-acetyl-2,7-anhydro-5-azido-3,5-dideoxy-D-glycero-α-D-galacto-2-nonulopyranosidonate (6):** Compound **3** (235.8 mg, 0.815 mmol, 1 equiv) and DMAP (20 mg, 0.163 mmol, 0.2 equiv) were dissolved in dry pyridine (4 mL). To this solution, acetic anhydride (1.5 mL) was added dropwise and stirred overnight at room temperature. After the reaction was complete, the solvent was evaporated through the addition of toluene (azeotropic conditions). Then, the crude product was dissolved in 1M HCl (aq) and extracted three times with EtOAc. The extract was dried over anhydrous MgSO<sub>4</sub>, filtered, and evaporated to dryness in vacuo. The crude product was purified by column chromatography using silica gel with 80% EtOAc in hexane to give **6** (261.6 mg, 77%) as colorless syrup.  $[\alpha]^{25}_{\text{D}} +78$  ( $c = 0.24$ , CHCl<sub>3</sub>); IR (CHCl<sub>3</sub>)  $\nu$  2105, 1744, 1439, 1371, 1224, 1162, 1099, 1050, 1017, 798, 743 cm<sup>-1</sup>; <sup>1</sup>H NMR (500 MHz, CDCl<sub>3</sub>):  $\delta$  = 5.05 (d,  $J = 5.5$  Hz, 1H, H-4), 4.95 (m, 1H, H-8), 4.55 (s, 1H, H-6), 4.53 (dd,  $J = 2.7, 12.5$  Hz, 1H, H-9a), 4.46 (d,  $J = 7.8$  Hz, 1H, H-7), 4.16 (dd,  $J = 4.6, 12.4$  Hz, 1H, H-9b), 3.80 (s, 3H, OCH<sub>3</sub>), 3.44 (s, 1H, H-5), 2.36 (dd,  $J = 5.8, 15.6$  Hz, 1H, H-3eq), 2.16 (d,  $J = 15.7$  Hz, 1H, H-3ax), 2.08, 2.07, 2.04 ppm (each s, 9H, 3OAc); <sup>13</sup>C NMR (125 MHz, CDCl<sub>3</sub>):  $\delta$  = 170.6 (CO), 169.9 (CO), 169.7 (CO), 166.4 (CO), 103.7 (C-2), 77.9 (CH), 75.4 (CH), 71.1 (CH), 67.9 (CH), 62.0 (CH<sub>2</sub>), 59.0 (CH), 53.3 (OCH<sub>3</sub>), 33.4 (CH<sub>2</sub>), 21.2, 21.0, 20.8 (each CH<sub>3</sub>) ppm; HRMS (ESI):  $m/z$  calcd for C<sub>16</sub>H<sub>21</sub>N<sub>3</sub>O<sub>10</sub> ([M+Na]<sup>+</sup>): 438.1125, found: 438.1133.

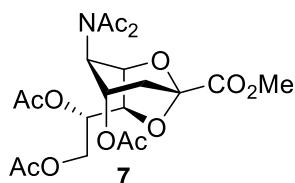

**Methyl 4,8,9-tri-O-acetyl-5-(*N*-acetylacetamido)-2,7-anhydro-3,5-dideoxy-*D*-glycero- $\alpha$ -*D*-galacto-2-nonulopyranosidonate (7):** Compound **5** (60 mg, 0.14 mmol, 1 equiv) and *p*-toluenesulfonic acid monohydrate (3 mg, 0.014 mmol, 0.2 equiv) were dissolved in isopropenyl acetate (0.6 mL, 40 equiv) and stirred at 80 °C for 16 h. Upon completion, the reaction was neutralized with in Et<sub>3</sub>N (0.3 mL) and evaporated in vacuo. The crude product was purified by silica gel column chromatography (80% gradient EtOAc in hexane) to afford **7** as white foam (44.4 mg, 67%).  $[\alpha]^{25}_D +88$  ( $c = 0.6$ , CHCl<sub>3</sub>); IR (CHCl<sub>3</sub>)  $\nu$  1742, 1660, 1537, 1372, 1224, 1052, 746 cm<sup>-1</sup>; <sup>1</sup>H NMR (400 MHz, CDCl<sub>3</sub>):  $\delta$  = 5.39-5.34 (m, 1H, H-4), 4.93-4.89 (m, 1H, H-8), 4.52 (dd,  $J = 2.7, 12.4$  Hz, 1H, H-9a), 4.46 (d,  $J = 1.6$  Hz, 1H, H-6), 4.23 (br s, 1H, H-5), 4.22 (br d,  $J = 3.3$ , 1H, H-7), 4.11 (dd,  $J = 4.3, 12.5$  Hz, 1H, H-9b), 3.80 (s, 3H, OCH<sub>3</sub>), 2.97 (dd,  $J = 7.9, 14.8$  Hz, 1H, H-3eq), 2.4 (s, 6H, NAc), 2.06 (s, 6H, 2OAc), 2.00 (s, 3H, 1OAc), 1.85 ppm (dd,  $J = 5.9, 14.8$  Hz, 1H, H-3ax); <sup>13</sup>C NMR (100 MHz, CDCl<sub>3</sub>):  $\delta$  = 173.6 (CO), 170.7 (CO), 170.0 (CO), 169.9 (CO), 166.7 (CO), 103.2 (C-2), 79.1 (CH), 78.8 (CH), 70.9 (CH), 67.1 (CH), 62.0 (CH<sub>2</sub>), 60.2 (CH), 53.4 (OCH<sub>3</sub>), 35.8 (CH<sub>2</sub>), 27.1, 21.1, 21.0, 20.9 (each CH<sub>3</sub>) ppm; HRMS (ESI):  $m/z$  calcd for C<sub>20</sub>H<sub>27</sub>NO<sub>12</sub> ([M+Na]<sup>+</sup>): 496.1431, found: 496.1432.

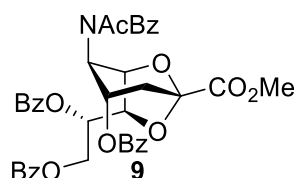

**Methyl 2,7-anhydro-4,8,9-tri-O-benzoyl-5-(*N*-benzoylacetamido)-3,5-dideoxy-D-glycero-α-D-galacto-2-nonulopyranosidonate (9):** Compound **2** (176 mg, 0.58 mmol, 1 equiv) and DMAP (250 mg, 2.41 mmol, 0.2 equiv) were dissolved in dry pyridine (3.5 mL). To this solution, benzoic chloride (1.17 mL) was added dropwise and kept for 15 h at room temperature. After the reaction was complete, the solvent was evaporated through the addition of toluene (azeotropic conditions). Then, the crude product was dissolved in a saturated CuSO<sub>4</sub> pentahydrate solution and extracted three times with EtOAc. The extract was dried over anhydrous MgSO<sub>4</sub>, filtered, and evaporated to dryness in vacuo. The crude product was purified by silica gel column chromatography with 40% EtOAc in hexane to give **9** (201.5 mg, 57%) as colorless syrup.  $[\alpha]^{25}_D +78$  ( $c = 0.5$ , CHCl<sub>3</sub>); <sup>1</sup>H NMR (400 MHz, CDCl<sub>3</sub>):  $\delta = 8.05$ -7.26 (m, 20H, Ar), 5.80-5.79 (m, 1H, H-4), 5.37-5.35 (m, 1H, H-8), 4.89 (br d,  $J = 2.2$  Hz, 1H, H-9a), 4.87 (br s, 1H, H-6), 4.77 (d,  $J = 8.1$  Hz, 1H, H-7), 4.72 (s, 1H, H-5), 4.63 (dd,  $J = 4.1, 12.4$  Hz, 1H, H-9b), 3.74 (s, 3H, OCH<sub>3</sub>), 2.95 (dd,  $J = 7.0, 15.2$  Hz, 1H, H-3eq), 2.12 (dd,  $J = 2.6, 15.4$  Hz, 1H, H-3ax), 1.86 ppm (s, 3H, NAc); <sup>13</sup>C NMR (100 MHz, CDCl<sub>3</sub>):  $\delta = 174.2$  (CO), 172.2 (CO), 166.8 (CO), 166.2 (CO), 165.63 (CO), 165.6 (CO), 135.8 (C), 133.9 (C), 133.5 (C), 133.4 (C), 133.2 (CH), 130.0 (CH), 130.0 (CH), 129.8 (CH), 129.5 (CH), 129.3 (CH), 128.6 (CH), 103.9 (C-2), 79.4 (CH), 77.6 (CH), 71.8 (CH), 68.3 (CH), 62.5 (CH<sub>2</sub>), 59.3 (CH), 53.1 (OCH<sub>3</sub>), 34.7 (CH<sub>2</sub>), 26.9 (CH<sub>3</sub>) ppm; HRMS (ESI):  $m/z$  calcd for C<sub>40</sub>H<sub>35</sub>NO<sub>12</sub> ([M+Na]<sup>+</sup>): 744.2057, found: 744.2060.



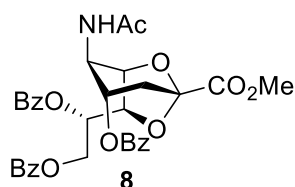

**Methyl 5-acetamido-2,7-anhydro-4,8,9-tri-O-benzoyl-3,5-dideoxy-D-glycero-α-D-galacto-2-nonulopyranosidonate (8):** Compound **9** (26.5 mg, 0.037 mmol, 1 equiv) was dissolved in dry Ac<sub>2</sub>O (104 μL, 1.1 mmol, 30 equiv). Cu(OTf)<sub>2</sub> (2.6 mg, 0.008 mmol, 0.2 equiv) was added to the reaction mixture and stirred for 2 h at 70 °C. The progress of the reaction was monitored by TLC analysis. Upon completion, the mixture was azeotropically distilled with toluene at 35 °C and directly purified by flash column chromatography (40% EtOAc in hexane) to afford **8** (12 mg, 47%) as colorless syrup.  $[\alpha]^{25}_D +62$  ( $c = 1.35$ , CHCl<sub>3</sub>); IR (CHCl<sub>3</sub>)  $\nu$  2924, 1751, 1720, 1657, 1602, 1584, 1451, 1274, 1095, 1070, 710 cm<sup>-1</sup>; <sup>1</sup>H NMR (400 MHz, CDCl<sub>3</sub>):  $\delta$  = 8.03-7.91 (6H, Ar), 7.55-7.33 (7H, Ar), 7.15-7.11 (2H, Ar), 6.23 (d,  $J = 8.9$  Hz, 1H, NH), 5.43-5.42 (m, 1H, H-8), 5.20 (d,  $J = 3.9$  Hz, 1H, H-4), 5.06 (d,  $J = 7.7$  Hz, 1H, H-7), 4.83 (br d,  $J = 12.4$  Hz, 1H, H-9a), 4.64 (br s, 1H, H-6), 4.62 (d,  $J = 4.2$  Hz, 1H, H-9b), 4.41 (d,  $J = 8.7$  Hz, 1H, H-5), 3.77 (s, 3H, OCH<sub>3</sub>), 2.36 (dd,  $J = 5.1, 16.0$  Hz, 1H, H-3eq), 2.32 (s, 1H, H-3ax), 2.01 ppm (s, 3H, NAc); <sup>13</sup>C NMR (100 MHz, CDCl<sub>3</sub>):  $\delta$  = 169.3 (CO), 166.8 (CO), 166.3 (CO), 165.7 (CO), 165.3 (CO), 133.7 (C), 133.3 (C), 130.1 (C), 129.8 (CH), 129.7 (CH), 129.5 (CH), 128.7 (CH), 128.6 (CH), 104.2 (C-2), 78.8 (CH), 76.0 (CH), 71.6 (CH), 69.0 (CH), 62.6 (CH<sub>2</sub>), 53.3 (OCH<sub>3</sub>), 49.1 (CH), 33.7 (CH<sub>2</sub>), 23.3 (CH<sub>3</sub>) ppm; HRMS (ESI):  $m/z$  calcd for C<sub>33</sub>H<sub>31</sub>NO<sub>11</sub> ([M+Na]<sup>+</sup>): 640.1795, found: 640.1802.

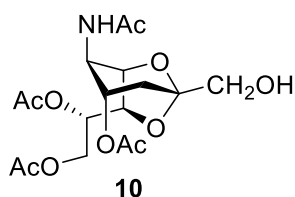

**Hydroxymethyl 5-acetamido-4,8,9-tri-O-acetyl-2,7-anhydro-3,5-dideoxy-D-glycero-α-D-galacto-2-octulopyranoside (10):** Compound **5** (111.9 mg, 0.276 mmol, 1 equiv) was dissolved in THF and heated to 100 °C. Then, LiBH<sub>4</sub> (10.13 μL, 0.414 mmol, 1.5 equiv) and MeOH (16.75 μL, 0.414 mmol) were added to the solution at the same temperature, and this was refluxed for 15 minutes. After the reaction was complete, the solution was neutralized by a drop of 1M HCl (aq) and concentrated in vacuo. The crude product was purified using column chromatography with 2% MeOH in CHCl<sub>3</sub> to afford **10**, a colorless syrup, in 50% yield (51.8 mg).  $[\alpha]^{28}_{\text{D}} +75$  (c = 0.28, CHCl<sub>3</sub>); IR (CHCl<sub>3</sub>)  $\nu$  3338, 1740, 1658, 1541, 1434, 1373, 1228, 1144, 1057 cm<sup>-1</sup>; <sup>1</sup>H NMR (400 MHz, CDCl<sub>3</sub>):  $\delta$  = 6.29 (d, *J* = 8.8 Hz, 1H, NH), 4.92-4.88 (m, 1H, H-8), 4.83 (d, *J* = 5.0 Hz, 1H, H-4), 4.53-4.48 (overlap, 2H, H-7, H-9a), 4.23 (s, 1H, H-6), 4.15-4.08 (overlap, 2H, H-5, H-9b), 3.62 (s, 2H, CH<sub>2</sub>), 2.51 (broad s, OH), 2.07 (s, 6H, 2OAc), 2.05 (s, 3H, 1OAc), 2.04-1.97 (overlap, 4H, H-3eq, 1OAc), 1.86 ppm (t, *J* = 8.9 Hz, 1H, H-3ax); <sup>13</sup>C NMR (100 MHz, CDCl<sub>3</sub>):  $\delta$  = 170.9 (CO), 170.4 (CO), 169.7 (CO), 169.5 (CO), 107.8 (C-2), 78.1 (CH), 74.9 (CH), 71.4 (CH), 69.0 (CH), 64.9 (CH<sub>2</sub>), 62.9 (CH<sub>2</sub>), 49.5 (CH), 32.5 (CH<sub>2</sub>), 23.3, 21.4, 21.1, 20.8 ppm (each CH<sub>3</sub>). HRMS (ESI): *m/z* calcd for C<sub>17</sub>H<sub>25</sub>NO<sub>10</sub> ([M+Na]<sup>+</sup>): 426.1376, found: 426.1375.

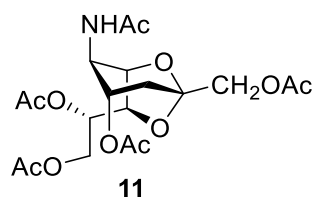

**Methylene 5-acetamido-1,4,8,9-tetra-O-acetyl-2,7-anhydro-3,5-dideoxy-D-glycero-α-D-galacto-2-octulopyranoside (11):** Compound **10** (59.2 mg, 0.147 mmol, 1 equiv) was dissolved in dry pyridine (1.5 mL), and DMAP (3.6 mg, 0.029 mmol, 0.2 equiv) and Ac<sub>2</sub>O (55 μL, 40 equiv) were and stirred overnight at room temperature. After the reaction was complete, the solvent was evaporated through the addition of toluene (azeotropic conditions). The crude product was purified by silica gel column chromatography with 90% EtOAc in hexane to give **11** in 82% (53.7 mg) yield.  $[\alpha]^{28}_{\text{D}} +76$  ( $c = 0.97$ , CHCl<sub>3</sub>); IR (CHCl<sub>3</sub>)  $\nu$  1741, 1660, 1537, 1372, 1223, 1054 cm<sup>-1</sup>; <sup>1</sup>H NMR (400 MHz, CDCl<sub>3</sub>):  $\delta$  = 6.06 (d,  $J = 8.9$  Hz, 1H, NH), 4.87-4.82 (overlap, 2H, H-8, H-4), 4.52 (d,  $J = 8.6$  Hz, 1H, H-7), 4.49 (dd,  $J = 2.5, 12.4$  Hz, 1H, H-9a), 4.27 (d,  $J = 12.3$  Hz, 1H, H-1), 4.23 (broad s, 1H, H-6), 4.18-4.13 (overlap, 2H, H-5, H-9b), 4.06 (d,  $J = 12.3$  Hz, 1H, H-1), 2.11, 2.08, 2.07, 2.06, 2.01 (each s, 15H, 5OAc), 1.99-1.89 (overlap, 2H, H-3eq, H-3ax) ppm; <sup>13</sup>C NMR (100 MHz, CDCl<sub>3</sub>):  $\delta$  = 170.6 (CO), 170.4 (CO), 170.2 (CO), 169.6 (CO), 169.3 (CO), 106.5 (C-2), 78.3 (CH), 74.8 (CH), 71.2 (CH), 68.7 (CH), 64.5 (CH<sub>2</sub>), 62.3 (CH<sub>2</sub>), 49.3 (CH), 32.8 (CH<sub>2</sub>), 23.3, 21.4, 21.1, 20.8 (each CH<sub>3</sub>) ppm. HRMS (ESI):  $m/z$  calcd for C<sub>19</sub>H<sub>27</sub>NO<sub>11</sub> ([M+Na]<sup>+</sup>): 468.1476, found: 468.1474.

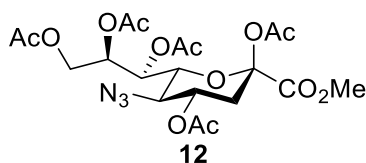

**Methyl 2,4,7,8,9-penta-O-acetyl-5-azido-3,5-dideoxy-D-glycero-β-D-galacto-2-nonulopyranosidate (12):** Compound **6** (36 mg, 0.09 mmol, 1 equiv) was dissolved in dry Ac<sub>2</sub>O (250 μL, 2.66 mmol, 30 equiv). SnCl<sub>4</sub> (5.2 μL, 0.044 mmol, 0.5 equiv) was added to the reaction mixture, and this was stirred for 19 h at room temperature. The progress of the reaction was monitored by TLC analysis. Upon completion, the solvent was removed with toluene (azeotropic distillation) at 35 °C and directly purified by flash column chromatography (40% EtOAc in hexane) to afford **12** (24.84 mg, 54%) and **13** (15.87 mg, 34%) as colorless syrups.  $[\alpha]^{25}_{\text{D}} -56$  ( $c = 0.87$ , CHCl<sub>3</sub>); IR (CHCl<sub>3</sub>)  $\nu$  2116, 1746, 1438, 1372, 1222, 1199, 1166, 1085 cm<sup>-1</sup>; <sup>1</sup>H NMR (500 MHz, CDCl<sub>3</sub>):  $\delta$  = 5.49 (dd,  $J$  = 1.6, 6.9 Hz, 1H, H-7), 5.17-5.15 (overlap, 2H, H-4, H-8), 4.39 (dd,  $J$  = 2.5, 12.6 Hz, 1H, H-9a), 4.16 (dd,  $J$  = 5.3, 12.6 Hz, 1H, H-9b), 3.74 (dd,  $J$  = 1.7, 10.7 Hz, 1H, H-6), 3.74 (s, 3H, OCH<sub>3</sub>), 3.33 (t,  $J$  = 10.0 Hz, 1H, H-5), 2.63 (dd,  $J$  = 5.1, 13.5 Hz, 1H, H-3eq), 2.17, 2.10, 2.08, 2.03, 2.02 (each s, 15H, 5OAc), 1.88 ppm (dd,  $J$  = 11.61, 13.5 Hz, 1H, H-3ax); <sup>13</sup>C NMR (125 MHz, CDCl<sub>3</sub>):  $\delta$  = 170.8 (CO), 170.0 (CO), 169.8 (CO), 169.7 (CO), 168.3 (CO), 166.3 (CO), 97.2 (C-2), 71.7 (CH), 70.4 (CH), 70.0 (CH), 68.4 (CH), 61.9 (CH<sub>2</sub>), 59.9 (CH), 53.3 (OCH<sub>3</sub>), 35.5 (CH<sub>2</sub>), 21.0, 20.9, 20.9, 20.8, 20.8 (each CH<sub>3</sub>) ppm; HRMS (ESI):  $m/z$  calcd for C<sub>20</sub>H<sub>27</sub>N<sub>3</sub>O<sub>13</sub> ([M+Na]<sup>+</sup>): 540.1442, found: 540.1434.

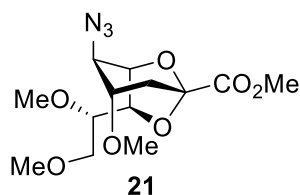

**Methyl 2,7-anhydro-5-azido-4,8,9-tri-O-methyl-3,5-dideoxy-D-glycero-α-D-galacto-2-nonulopyranosidonate (21):** Compound **3** (38.1 mg, 0.132 mmol, 1 equiv) was dissolved in dry DMF (2 mL) and cooled to 0 °C. Then, NaH (60%, 26.3 mg, 0.659 mmol, 5 equiv) was added slowly, and this was stirred for 30 min until the evolution of hydrogen gas ceased. Methyl iodide (49.2 μL, 0.79 mmol, 6 equiv) was added dropwise over 15 minutes. The reaction mixture was stirred overnight at room temperature. Upon completion of the reaction, the mixture was quenched with ice-cold water and diluted with EtOAc (5 mL). The desired product was extracted with EtOAc (three times) from the aqueous phase and separated. Then, the combined organic layers were dried over anhydrous MgSO<sub>4</sub>, filtered, and concentrated. Silica gel column chromatography (hexane:EtOAc, 1:1, v/v) afforded compound **21** as colorless syrup (17 mg, 40%).  $[\alpha]^{25}_D +57$  ( $c = 1.85$ , CHCl<sub>3</sub>); IR (CHCl<sub>3</sub>)  $\nu$  2933, 2101, 1752, 1441, 1309, 1262, 1193, 1091, 1048, 743 cm<sup>-1</sup>; <sup>1</sup>H NMR (500 MHz, CDCl<sub>3</sub>):  $\delta$  = 4.69 (s, 1H, H-6), 4.36 (d,  $J = 9.1$  Hz, 1H, H-7), 3.79 (s, 3H, OCH<sub>3</sub>), 3.66 (dd,  $J = 2.4, 10.7$  Hz, 1H, H-9a), 3.52 (br dd,  $J = 1.3, 5.9$  Hz, 1H, H-4), 3.48 (dd,  $J = 3.8, 10.7$  Hz, 1H, H-9b), 3.44 (br s, 1H, H-5), 3.42, 3.36, 3.34 (each s, 9H, OMe), 3.18-3.15 (m, 1H, H-8), 2.24 (d,  $J = 15.1$  Hz, 1H, H-3eq), 2.15 (dd,  $J = 5.7, 15.2$  Hz, 1H, H-3ax); <sup>13</sup>C NMR (125 MHz, CDCl<sub>3</sub>):  $\delta$  = 167.3 (CO), 103.6 (C-2), 79.8 (CH), 78.3 (CH), 76.1 (CH), 75.8 (CH), 69.9 (CH<sub>2</sub>), 59.5 (CH), 58.5 (OCH<sub>3</sub>), 58.0 (OCH<sub>3</sub>), 57.7 (OCH<sub>3</sub>), 57.1 (OCH<sub>3</sub>), 33.6

(CH<sub>2</sub>) ppm; HRMS (ESI): *m/z* calcd for C<sub>13</sub>H<sub>21</sub>N<sub>3</sub>O<sub>7</sub> ([M+Na]<sup>+</sup>): 354.1277, found: 354.1268.

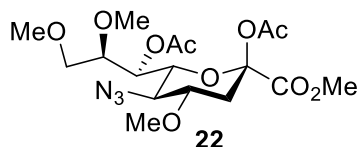

**Methyl 2,7-di-O-acetyl-5-azido-4,8,9-tri-O-methyl-3,5-dideoxy-D-glycero-β-D-galacto-2-nonulopyranosidonate (22):** Compound **21** (16.3 mg, 0.05 mmol, 1 equiv) was dissolved in dry Ac<sub>2</sub>O (150 μL, 1.48 mmol, 30 equiv). SnCl<sub>4</sub> (2.9 μL, 0.025 mmol, 0.6 equiv) was added to the reaction mixture, and this was stirred for 2 h at room temperature. The progress of the reaction was monitored by TLC analysis. Upon completion, the mixture was azeotroped with toluene at 35 °C and directly purified by flash column chromatography (50% EtOAc in hexane) to give **22** (14.14 mg, 66%) and glycal **23** (6 mg, 27%) as colorless syrups. [α]<sup>25</sup><sub>D</sub> -133 (c = 0.29, CHCl<sub>3</sub>); IR (CHCl<sub>3</sub>) ν 2929, 2115, 1750, 1556, 1441, 1271, 1232, 1205, 1163, 1101, 929 cm<sup>-1</sup>; <sup>1</sup>H NMR (500 MHz, CDCl<sub>3</sub>): δ = 5.34 (dd, *J* = 1.5, 9.2 Hz, 1H, H-7), 3.81 (dd, *J* = 1.5, 10.9 Hz, 1H, H-6), 3.77 (s, 3H, OCH<sub>3</sub>), 3.65-3.60 (m, 1H, H-4), 3.57 (dd, *J* = 2.9, 10.7 Hz, 1H, H-9a), 3.54-3.50 (m, 1H, H-8), 3.45, 3.32, 3.30 (each s, 9H, OMe), 3.27 (dd, *J* = 3.8, 10.8 Hz, 1H, H-9b), 3.13 (dd, *J* = 1.4, 10.8 Hz, 1H, H-5), 2.59 (dd, *J* = 5.0, 13.5 Hz, 1H, H-3eq), 2.11, 2.08 (each s, 6H, 2OAc), 1.66 (dd, *J* = 2.2, 13.4 Hz, 1H, H-3ax); <sup>13</sup>C NMR (125 MHz, CDCl<sub>3</sub>): δ = 170.0 (CO), 168.4 (CO), 167.4 (CO), 97.4 (C-2), 77.9 (CH), 76.6 (CH), 71.1 (CH), 70.3 (CH<sub>2</sub>), 69.1 (CH), 61.4 (CH), 59.5 (OCH<sub>3</sub>), 57.6 (OCH<sub>3</sub>), 57.4 (OCH<sub>3</sub>), 53.2 (OCH<sub>3</sub>), 35.7 (CH<sub>2</sub>), 21.0, 20.8 (each CH<sub>3</sub>) ppm; HRMS (ESI): *m/z* calcd for C<sub>17</sub>H<sub>27</sub>N<sub>3</sub>O<sub>10</sub> ([M+Na]<sup>+</sup>): 456.1594, found: 456.1594.

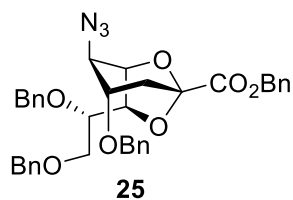

**Benzyl 2,7-anhydro-5-azido-4,8,9-tri-O-benzyl-3,5-dideoxy-D-glycero-α-D-galacto-2-nonulopyranosidonate (25):** Compound **3** (50 mg, 0.173 mmol, 1 equiv) was dissolved in dry DMF (2 mL), and cooled to 0 °C. Then, NaH (60%) (41 mg, 1.04 mmol, 6 equiv) was added slowly, and this was stirred for 30 min until hydrogen gas evolution ceased. Benzyl bromide (123.4 μL, 1.04 mmol, 6 equiv) was added dropwise over 15 minutes. The reaction mixture was stirred overnight at room temperature. Upon completion of the reaction, the mixture was quenched with ice water and diluted with CH<sub>2</sub>Cl<sub>2</sub> (10 mL). The desired product was extracted with CH<sub>2</sub>Cl<sub>2</sub> (three times) from the aqueous phase and separated. Then, the combined organic layer was dried over anhydrous MgSO<sub>4</sub>, filtered, and concentrated. Silica gel column chromatography (9:1, hexane:EtOAc, v/v) afforded compound **25** as colorless syrup (45.3 mg, 50%). [α]<sup>25</sup><sub>D</sub> +28 (c = 0.5, CHCl<sub>3</sub>); IR (CHCl<sub>3</sub>) ν 2919, 2099, 1749, 1586, 1496, 1454, 1260, 1204, 1156, 1089, 737, 697 cm<sup>-1</sup>; <sup>1</sup>H NMR (600 MHz, CDCl<sub>3</sub>): δ = 7.32-7.25 (m, 20H, Ar), 5.24 (d, *J* = 12.3 Hz, 1H, OCH<sub>2</sub>), 5.18 (d, *J* = 12.3 Hz, 1H, OCH<sub>2</sub>), 4.71-4.69 (overlap, 2H, H-6, OCH<sub>2</sub>), 4.57-4.46 (overlap, 6H, H-7, OCH<sub>2</sub>), 3.37-3.71 (overlap, 2H, H-4, H-9a), 3.58 (dd, *J* = 4.7, 10.8 Hz, 1H, H-9b), 3.54-3.52 (m, 1H, H-8), 3.46 (s, 1H, H-5), 2.28 (d, *J* = 15.2 Hz, 1H, H-3eq), 2.18 ppm (dd, *J* = 5.8, 15.1 Hz, 1H, H-3ax); <sup>13</sup>C NMR (150 MHz, CDCl<sub>3</sub>): δ = 166.7 (CO), 138.5, 138.2, 137.4, 135.2 (each C), 128.7 (CH), 128.7 (CH), 128.6 (CH), 128.5 (CH), 128.3 (CH), 128.2 (CH), 128.0 (CH), 128.0 (CH), 127.8 (CH), 127.7 (CH), 127.7 (CH), 103.7 (C-2), 78.2 (CH), 78.2 (CH), 76.5 (CH), 73.5 (OCH<sub>2</sub>), 73.3 (CH), 72.7 (OCH<sub>2</sub>), 71.5 (OCH<sub>2</sub>), 69.1 (CH<sub>2</sub>), 67.6 (OCH<sub>2</sub>), 59.4 (CH),

33.6 ppm (CH<sub>2</sub>); HRMS (ESI): *m/z* calcd for C<sub>37</sub>H<sub>37</sub>N<sub>3</sub>O<sub>7</sub> ([M+Na]<sup>+</sup>): 658.2529, found: 658.2523.

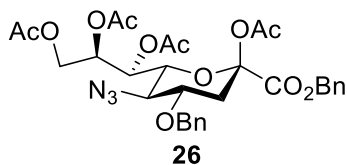

**Benzyl 2,7,8,9-tetra-O-acetyl-5-azido-4-O-benzyl-3,5-dideoxy- $\beta$ -D-galacto-2-nonulopyranosidonate (26):** Compound **25** (20 mg, 0.03 mmol, 1 equiv) was dissolved in dry Ac<sub>2</sub>O (100  $\mu$ L, 0.94 mmol, 35 equiv). SnCl<sub>4</sub> (1  $\mu$ L, 0.008 mmol, 0.25 equiv) was added to the reaction mixture, and this was stirred for 0.5 h at room temperature. The progress of the reaction was monitored by TLC analysis. Upon completion, the solvent was removed using toluene (azeotropic distillation) at 35 °C and directly purified by flash column chromatography (25% EtOAc in hexane) to give **26** (6.1 mg, 27%) and **27** (11.96 mg, 52%) as colorless syrups. Compound **26**: [ $\alpha$ ]<sup>33</sup><sub>D</sub> - 19 (*c* = 0.175, CHCl<sub>3</sub>); IR (CHCl<sub>3</sub>)  $\nu$  2924, 2115, 1751, 1371, 1218, 1056, 773, 698 cm<sup>-1</sup>; <sup>1</sup>H NMR (400 MHz, CDCl<sub>3</sub>):  $\delta$  = 7.36-7.29 (m, 10H, Ar), 5.50 (d, *J* = 6.4 Hz, 1H, H-7), 5.21-5.13 (m, 3H, H-8, OCH<sub>2</sub>), 4.64 (d, *J* = 11.1 Hz, 1H, OCH<sub>2</sub>), 4.58 (d, *J* = 11.1 Hz, 1H, OCH<sub>2</sub>), 4.39 (d, *J* = 12.7 Hz, 1H, H-9a), 4.16 (dd, *J* = 5.1, 12.5 Hz, 1H, H-9b), 3.83-3.77 (m, 1H, H-4), 3.66 (d, *J* = 10.7 Hz, 1H, H-6), 3.26 (dd, *J* = 6.1, 16.2 Hz, 1H, H-5), 2.66 (dd, *J* = 4.9, 13.6 Hz, 1H, H-3eq), 2.11, 2.03, 2.01, 1.99 (each s, 12H, 4OAc), 1.82 (t, *J* = 12.6 Hz, 1H, H-3ax); <sup>13</sup>C NMR (100 MHz, CDCl<sub>3</sub>):  $\delta$  = 170.8 (CO), 170.0 (CO), 169.7 (CO), 168.3 (CO), 166.0 (CO), 137.1 (C), 135.1 (C), 128.7 (CH), 128.7 (CH), 128.6 (CH), 128.3 (CH), 128.3 (CH), 128.1 (CH), 97.9 (C-2), 75.5 (CH), 72.0 (CH), 72.0 (OCH<sub>2</sub>), 70.4 (CH), 68.6 (CH), 68.0 (OCH<sub>2</sub>), 62.0 (CH), 61.2 (CH<sub>2</sub>), 35.4 (CH<sub>2</sub>), 20.9 (CH<sub>3</sub>), 20.8 ppm (CH<sub>3</sub>); HRMS (ESI): *m/z* calcd for C<sub>31</sub>H<sub>35</sub>N<sub>3</sub>O<sub>12</sub> ([M+Na]<sup>+</sup>): 664.2118, found: 664.2121.



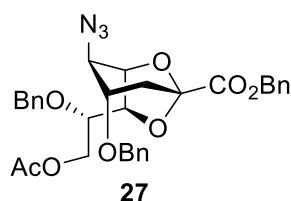

**Benzyl 9-O-acetyl-2,7-anhydro-5-azido-4,8-di-O-benzyl-3,5-dideoxy-D-glycero- $\alpha$ -D-galacto-2-nonulopyranosidonate (27):**  $[\alpha]^{28}_{\text{D}} +20$  ( $c = 0.26$ ,  $\text{CHCl}_3$ ); IR ( $\text{CHCl}_3$ )  $\nu$  2953, 2920, 2852, 2101, 1742, 1455, 1378, 1305, 1247, 1099, 1089, 1050, 741, 699  $\text{cm}^{-1}$ ;  $^1\text{H}$  NMR (600 MHz,  $\text{CDCl}_3$ ):  $\delta = 7.34\text{--}7.26$  (m, 15H, Ar), 5.24 (d,  $J = 12.2$  Hz, 1H,  $\text{OCH}_2$ ), 5.18 (d,  $J = 12.2$  Hz, 1H,  $\text{OCH}_2$ ), 4.67 (d,  $J = 11.1$  Hz, 1H,  $\text{OCH}_2$ ), 4.62–4.59 (overlap, 2H, H-7, H-9a), 4.56 (d,  $J = 11.9$  Hz, 1H,  $\text{OCH}_2$ ), 4.51–4.48 (overlap, 2H, H-6,  $\text{OCH}_2$ ), 4.43 (d,  $J = 11.2$  Hz, 1H,  $\text{OCH}_2$ ), 4.02 (dd,  $J = 1.4, 5.6$  Hz, 1H, H-9b), 3.74 (dd,  $J = 3.5, 12.2$  Hz, 1H, H-4), 3.50–3.47 (m, 2H, H-8, H-5), 2.31 (d,  $J = 15.1$  Hz, 1H, H-3eq), 2.18 (dd,  $J = 5.6, 15.2$  Hz, 1H, H-3ax), 1.99 (s, 3H, 1OAc) ppm;  $^{13}\text{C}$  NMR (150 MHz,  $\text{CDCl}_3$ ):  $\delta = 170.9$  (CO), 166.52 (CO), 137.5 (C), 137.4 (C), 135.1 (C), 128.8 (CH), 128.8 (CH), 128.7 (CH), 128.4 (CH), 128.4 (CH), 128.1 (CH), 127.7 (CH), 103.81 (C-2), 78.4 (CH), 75.9 (CH), 72.4 ( $\text{OCH}_2$ ), 71.6 ( $\text{OCH}_2$ ), 67.8 ( $\text{OCH}_2$ ), 61.2 ( $\text{CH}_2$ ), 59.3 (CH), 33.3 ( $\text{CH}_2$ ), 21.0 ( $\text{CH}_3$ ) ppm; HRMS (ESI):  $m/z$  calcd for  $\text{C}_{32}\text{H}_{33}\text{N}_3\text{O}_8$  ( $[\text{M}+\text{Na}]^+$ ): 610.2165, found: 610.2173.

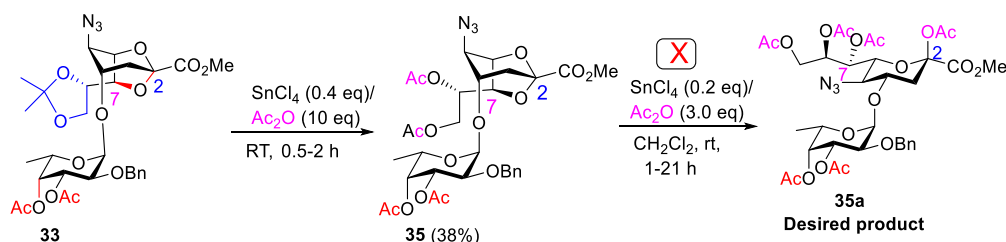

**Methyl 8,9-di-O-acetyl-2,7-anhydro-5-azido-3,5-dideoxy-4-O-(3,4-di-O-acetyl-2-O-benzyl- $\alpha$ -L-fucopyranosyl)-D-glycero- $\alpha$ -D-galacto-2-**

**nonulopyranosidonate (35):** Disaccharide **33** (29.2 mg, 0.045 mmol, 1 equiv) was dissolved in dry  $\text{Ac}_2\text{O}$  (42.5  $\mu\text{L}$ , 0.45 mmol, 10 equiv).  $\text{SnCl}_4$  (2.1  $\mu\text{L}$ , 0.018 mmol, 0.4 equiv) was added to the solution, and this was kept for 0.5 to 2 h at rt. Upon completion, the reaction was azeotroped with toluene at 35  $^\circ\text{C}$ . Purification of the crude product with flash column chromatography using 50% EtOAc in hexane gave **35** (12.8 mg, 38%) as colorless syrup. Furthermore, disaccharide **35** was subjected to an acetolysis reaction with a reduced amount of  $\text{SnCl}_4$  and  $\text{Ac}_2\text{O}$  in  $\text{CH}_2\text{Cl}_2$ , but the reaction did not proceed even with an increased reaction time.  $[\alpha]^{28}_{\text{D}} -5.61$  ( $c = 0.41$ ,  $\text{CHCl}_3$ ); IR ( $\text{CHCl}_3$ )  $\nu$  2922, 2104, 1746, 1371, 1243, 1223, 1096, 1079, 1048  $\text{cm}^{-1}$ ;  $^1\text{H}$  NMR (500 MHz,  $\text{CDCl}_3$ ):  $\delta = 7.37$ -7.29 (m, 5H, Ar), 5.24 (br d,  $J = 3.3$  Hz, 1H, H-4), 5.19 (dd,  $J = 3.3, 10.5$  Hz, 1H, H-3), 4.96-4.93 (m, 1H, H'-8), 4.76-4.71 (overlap, 3H, H'-7, H-1,  $\text{OCH}_2$ ), 4.52-4.47 (overlap, 3H, H'-6, H'9a,  $\text{OCH}_2$ ), 4.22 (q,  $J = 6.4, 13.2$  Hz, 1H, H-5), 4.1 (dd,  $J = 4.6, 12.5$  Hz, 1H, H'-9b), 3.83-3.80 (overlap, 5H,  $\text{OCH}_3$ , H-2, H'-4), 3.21 (br s, 1H, H'-5), 2.28 (d,  $J = 15.0$  Hz, 1H, H'-3eq), 2.21 (dd,  $J = 5.5, 15.4$  Hz, 1H, H'-3ax), 2.14, 2.06, 2.00, 1.95 (each s, 12H, 4OAc), 1.07 (d,  $J = 6.6$  Hz, 3H, 5- $\text{CH}_3$ ) ppm;  $^{13}\text{C}$  NMR (125 MHz,  $\text{CDCl}_3$ ):  $\delta = 170.9$  (CO), 170.6 (CO), 170.1 (CO), 169.9 (CO), 166.7 (CO), 138.2 (C), 128.9 (CH), 128.5 (CH), 128.1 (CH), 103.7 (C'-2), 99.0 (CH-1), 77.9 (CH), 75.2 (CH), 74.5 (CH), 74.4 ( $\text{OCH}_2$ ), 71.6 (CH), 71.4 (CH), 70.2 (CH), 65.6 (CH), 61.9 ( $\text{CH}_2$ ), 58.9 (CH), 53.2

(OCH<sub>3</sub>), 34.4 (CH<sub>2</sub>), 21.1, 20.9, 20.8, 20.7, 15.9 (each CH<sub>3</sub>); HRMS (ESI): *m/z* calcd for C<sub>31</sub>H<sub>39</sub>N<sub>3</sub>O<sub>15</sub> ([M+Na]<sup>+</sup>): 716.2279, found: 716.2277.

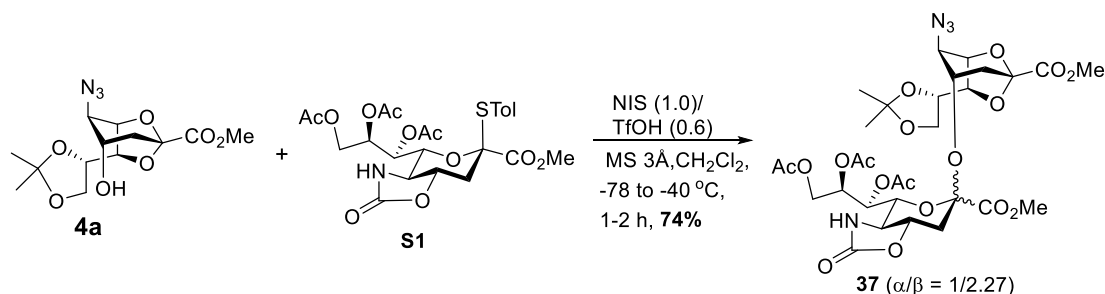

**Methyl 2,7-anhydro-5-azido-3,5-dideoxy-8,9-O-isopropylidene-4-O-(methyl 7,8,9-tri-O-acetyl-5-N,4-O-carbonyl-3,5-dideoxy-D-glycero- $\alpha$ -D-galacto-2-nonulopyranosidonate)-D-glycero- $\alpha/\beta$ -D-galacto-2-nonulopyranosidonate**

**(37):** Donor **S1** [1] (46.6 mg, 0.086 mmol, 1.2 equiv) and acceptor **4a** (23.7 mg, 0.072 mmol, 1 equiv) were azeotroped with toluene at 35 °C and dissolved in dry CH<sub>2</sub>Cl<sub>2</sub> (1.5 mL). Freshly activated 3 Å molecular sieve (120 mg) was added, and the mixture was stirred at rt for 1 h under N<sub>2</sub> atmosphere. The reaction mixture was cooled to -40 °C and NIS (26.0 mg, 0.115 mmol, 1 equiv) and TfOH (3.8  $\mu$ L, 0.043 mmol, 0.6 equiv) were added, and this was stirred for 1 h. The completion of the reaction was confirmed by TLC analysis. The reaction was then allowed to warm to 0 °C for 0.5 h. The reaction was quenched with Et<sub>3</sub>N, diluted with CH<sub>2</sub>Cl<sub>2</sub>, filtered through Celite, and further neutralized with a saturated aqueous solution of NaHCO<sub>3</sub>. The organic layer was washed with a 10% aq Na<sub>2</sub>S<sub>2</sub>O<sub>3</sub> solution, treated with brine, dried over anhydrous MgSO<sub>4</sub>, filtered, and concentrated in vacuo. Purification of the crude product by flash column chromatography on silica gel (EtOAc:hexanes, 1:4, v/v) afforded disaccharide **37** ( $\alpha/\beta$  = 1.0/2.27, 39.2 mg, 74%) as colorless syrup. Compound **37 $\beta$** : [ $\alpha$ ]<sub>D</sub><sup>19</sup> +15.75 (*c* = 0.64, CHCl<sub>3</sub>); IR (CHCl<sub>3</sub>)  $\nu$  2924, 2854, 2105, 1746, 1454, 1374, 1223, 1157, 1071, 760 cm<sup>-1</sup>; <sup>1</sup>H NMR (500

MHz, CDCl<sub>3</sub>):  $\delta$  = 5.37 (s, 1H, NH'), 5.30 (m, 1H, H'-8), 5.12 (dd,  $J$  = 2.0, 6.5 Hz, 1H, H'-7), 4.67 (br s, 1H, H-6), 4.60 (dd,  $J$  = 1.8, 12.7 Hz, 1H, H'-9a), 4.47 (td,  $J$  = 3.7, 12.2 Hz, 1H, H'-4), 4.19-4.14 (overlap, 3H, H-7, H-4, H'-9b), 4.08 (dd,  $J$  = 5.9, 8.6 Hz, 1H, H-9a), 3.99 (dd,  $J$  = 2.0, 9.8 Hz, 1H, H'-6), 3.97-3.89 (overlap, 2H, H-8, H-9b), 3.84 (s, 3H, CO<sub>2</sub>Me'), 3.80 (s, 3H, CO<sub>2</sub>Me), 3.47 (br s, 1H, H-5), 3.07 (t,  $J$  = 10.7 Hz, 1H, H'-5), 2.65 (dd,  $J$  = 3.8, 12.3 Hz, 1H, H'-3eq), 2.25 (dd,  $J$  = 5.8, 15.1 Hz, 1H, H-3eq), 2.16 (s, 3H, 1OAc), 2.15 (t,  $J$  = 7.3 Hz, 1H, H'-3ax), 2.10 (s, 3H, 1OAc), 2.01 (s, 3H, 1OAc), 1.88 (d,  $J$  = 15.0 Hz, 1H, H-3ax), 1.40 (s, 3H, CH<sub>3</sub>), 1.31 ppm (s, 3H, CH<sub>3</sub>); <sup>13</sup>C NMR (125 MHz, CDCl<sub>3</sub>):  $\delta$  = 171.2 (CO), 170.7 (CO), 170.3 (CO), 167.3 (CO), 166.9 (CO), 159.2 (CO), 110.0 (C), 103.1 (C-2), 100.2 (C'-2), 78.5 (CH), 78.4 (CH), 76.0 (CH), 75.1 (CH), 74.0 (CH), 70.1 (CH), 69.5 (CH), 69.4 (CH), 67.2 (CH<sub>2</sub>), 61.9 (CH<sub>2</sub>), 59.8 (CH), 58.1 (CH), 53.6 (OMe), 53.3 (OMe), 37.9 (CH<sub>2</sub>), 35.7 (CH<sub>2</sub>), 27.1, 25.3, 21.2, 20.8, 20.8 (each CH<sub>3</sub>) ppm; HRMS (ESI):  $m/z$  calcd for C<sub>30</sub>H<sub>40</sub>N<sub>4</sub>O<sub>18</sub> ([M+Na]<sup>+</sup>): 767.2235, found: 767.2242.

Compound **37a**:  $[\alpha]^{20}_D$  +17.60 ( $c$  = 0.40, CHCl<sub>3</sub>); IR (CHCl<sub>3</sub>)  $\nu$  2970, 2928, 2106, 1739, 1723, 1436, 1366, 1228, 1217, 1096, 1064 cm<sup>-1</sup>; <sup>1</sup>H NMR (500 MHz, CDCl<sub>3</sub>):  $\delta$  = 5.49 (dt,  $J$  = 2.1, 10.05 Hz, 1H, H'-8), 5.36 (s, 1H, NH'), 5.10 (dd,  $J$  = 1.6, 10.1 Hz, 1H, H'-7), 4.74 (br s, 1H, H-6), 4.34-4.20 (overlap, 4H, H'-6, H'-9a, H'-9b, H-7), 4.10-4.02 (overlap, 3H, H'-4, H-9a, H-4), 4.00-3.96 (m, 1H, H-8), 3.92 (dd,  $J$  = 4.9, 8.57 Hz, 1H, H-9b), 3.80 (s, 3H, CO<sub>2</sub>Me'), 3.78 (s, 3H, CO<sub>2</sub>Me), 3.54 (br s, 1H, H-5), 3.01 (t,  $J$  = 10.9 Hz, 1H, H'-5), 2.91 (dd,  $J$  = 3.6, 12.3 Hz, 1H, H'-3eq), 2.20-2.13 (overlap, 2H, H-3eq, H-3ax), 2.15 (s, 3H, 1OAc), 2.15 (s, 3H, 1OAc), 2.04 (s, 3H, 1OAc), 2.00 ppm (t,  $J$  = 12.8 Hz, 1H, H'-3ax), 1.40 (s, 3H, CH<sub>3</sub>), 1.32 ppm (s, 3H, CH<sub>3</sub>); <sup>13</sup>C NMR (125 MHz, CDCl<sub>3</sub>):  $\delta$  = 171.4 (CO), 170.7 (CO), 169.7 (CO), 168.6 (CO), 166.9 (CH), 159.2 (CO), 110.0 (C), 103.1 (C-2), 100.2 (C'-2), 78.5 (CH), 78.4 (CH), 76.0 (CH), 75.1 (CH), 74.0 (CH), 70.1 (CH), 69.5 (CH), 69.4 (CH),

67.2 (CH<sub>2</sub>), 61.9 (CH<sub>2</sub>), 59.8 (CH), 58.1 (CH), 53.6 (OMe), 53.3 (OMe), 37.9 (CH<sub>2</sub>), 35.7 (CH<sub>2</sub>), 27.1, 25.30, 21.2, 20.8, 20.8 ppm (each CH<sub>3</sub>); HRMS (ESI): *m/z* calcd for C<sub>30</sub>H<sub>40</sub>N<sub>4</sub>O<sub>18</sub> ([M+Na]<sup>+</sup>): 767.2230, found: 767.2222.

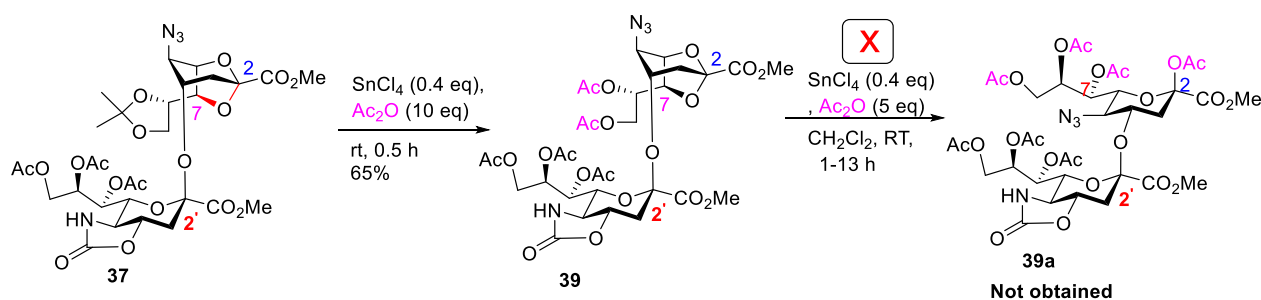

**Methyl 8,9-di-*O*-acetyl-2,7-anhydro-5-azido-3,5-dideoxy-4-*O*-(methyl 7,8,9-tri-*O*-acetyl-5-*N*,4-*O*-carbonyl-3,5-dideoxy- $\beta$ -glycero- $\alpha$ -*D*-galacto-2-nonulopyranosidonate)- $\beta$ -glycero- $\beta$ -*D*-galacto-2-nonulopyranosidonate (39):**

Compound **37** (18.6 mg, 0.025 mmol, 1 equiv) was dissolved in dry Ac<sub>2</sub>O (23.6  $\mu$ L, 0.25 mmol, 10 equiv). SnCl<sub>4</sub> (1.2  $\mu$ L, 0.001 mmol, 0.4 equiv) was added dropwise to the solution, and this was kept for 0.5 h at rt. Upon completion, the reaction mixture was azeotropically distilled at 35 °C after the addition of toluene. Purification of the crude product by flash column chromatography using 50% EtOAc in hexane gave **39** (12.8 mg, 65%) as colorless syrup. Furthermore, disaccharide **39** was subjected to an acetolysis reaction with a reduced amount of Ac<sub>2</sub>O in CH<sub>2</sub>Cl<sub>2</sub>, but the reaction did not proceed even with increased reaction time.  $[\alpha]^{20}_{\text{D}} +0.89$  (*c* = 0.26, CHCl<sub>3</sub>); IR (CHCl<sub>3</sub>)  $\nu$  2954, 2919, 2850, 2107, 1738, 1463, 1376, 1228, 1217, 1091, 1019, 761 cm<sup>-1</sup>; <sup>1</sup>H NMR (500 MHz, CDCl<sub>3</sub>):  $\delta$  = 5.38 (br s, 1H, NH'), 5.30 (td, *J* = 1.9, 6.5 Hz, 1H, H'-8), 5.13 (dd, *J* = 2.2, 6.5 Hz, 1H, H'-7), 4.94-4.92 (m, 1H, H-8), 4.58 (dd, *J* = 1.9, 12.7 Hz, 1H, H'-9a), 4.54-4.45 (overlap, 4H, H'-4, H-7, H-6, H-9a), 4.20-4.13 (overlap, 3H, H-4, H-9b, H'-9b), 4.04 (dd, *J* = 2.2, 9.8 Hz, 1H, H'-6), 3.86 (s, 3H, CO<sub>2</sub>Me'), 3.81 (s, 3H, CO<sub>2</sub>Me), 3.53 (br

s, 1H, H-5), 3.09 (t,  $J$  = 10.9 Hz, 1H, H'-5), 2.61 (dd,  $J$  = 3.8, 12.17 Hz, 1H, H'-3eq), 2.28 (dd,  $J$  = 5.7, 15.2 Hz, 1H, H-3eq), 2.18 (t,  $J$  = 13.9 Hz, 1H, H'-3ax), 2.16 (s, 3H, 1Ac), 2.12 (s, 3H, 1Ac), 2.09 (s, 3H, 1Ac), 2.05 (s, 3H, 1Ac), 2.02 (s, 3H, 1Ac), 1.91 ppm (d,  $J$  = 15.1 Hz, 1H, H-3ax);  $^{13}\text{C}$  NMR (125 MHz,  $\text{CDCl}_3$ ):  $\delta$  = 171.2 (CO), 170.7 (CO), 170.7 (CO), 170.4 (CO), 170.0 (CO), 167.4 (CO), 166.6 (CO), 159.0 (CO), 103.3 (C-2), 100.5 (C'-2), 78.1 (CH), 75.9 (CH), 75.2 (CH), 74.0 (CH), 71.1 (CH), 70.1 (CH), 69.8 (CH), 69.4 (CH), 61.9 ( $\text{CH}_2$ ), 59.8 (CH), 58.3 (CH), 53.7 (OMe), 53.4 (OMe), 38.1 ( $\text{CH}_2$ ), 35.2 ( $\text{CH}_2$ ), 21.2, 21.1, 20.8, 20.8 ppm (each  $\text{CH}_3$ ); HRMS (ESI):  $m/z$  calcd for  $\text{C}_{31}\text{H}_{40}\text{N}_4\text{O}_{20}$  ( $[\text{M}+\text{Na}]^+$ ): 811.2128, found: 811.2133.

# NMR spectra

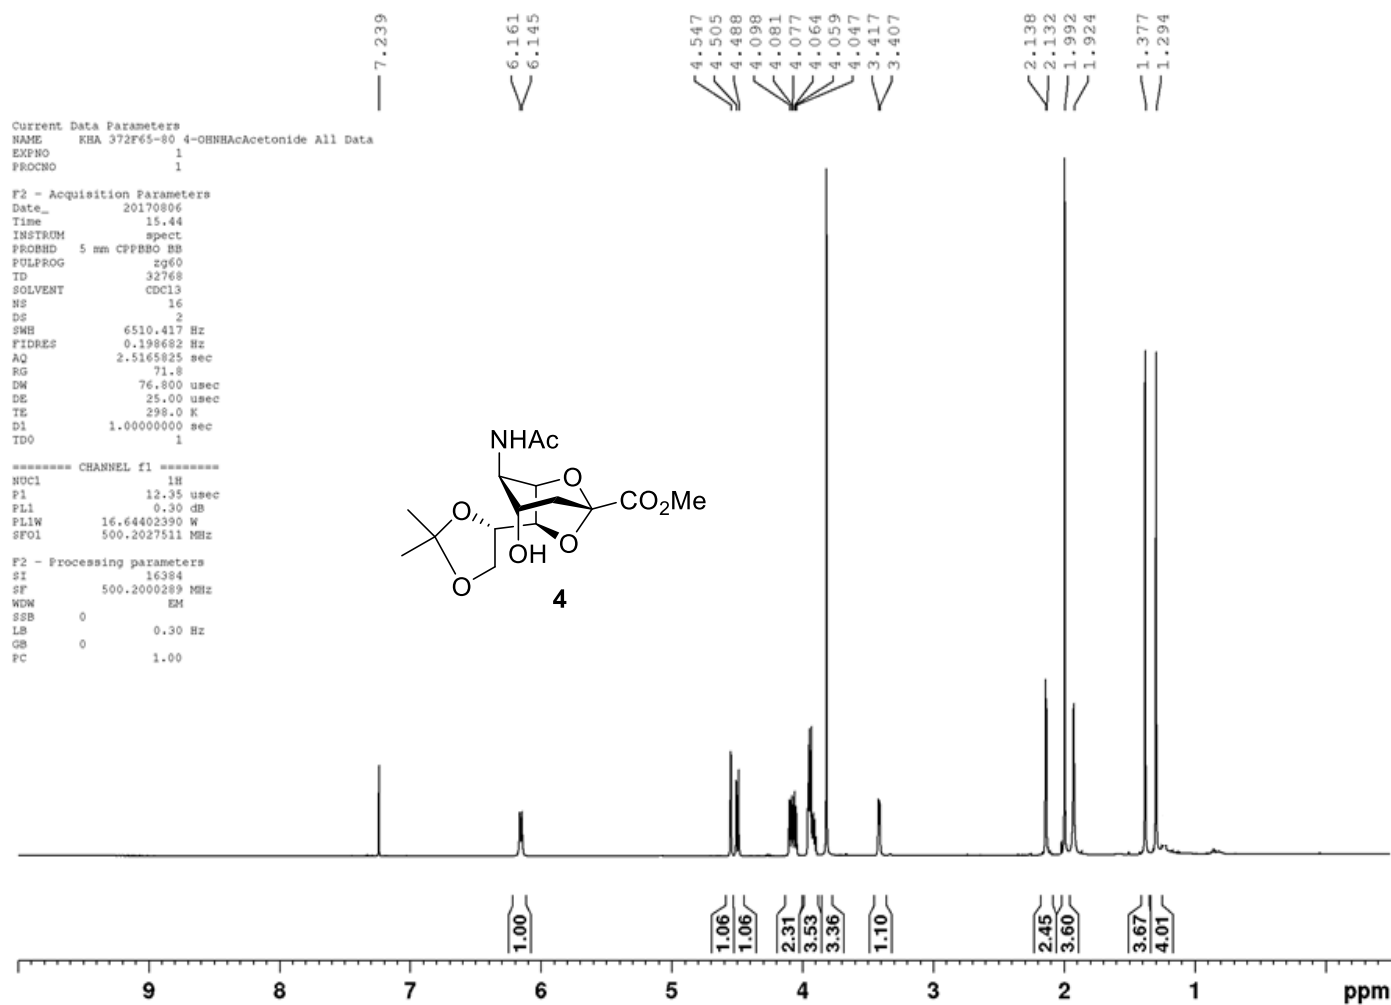

The  $^1\text{H}$  NMR spectrum of compound **4**.

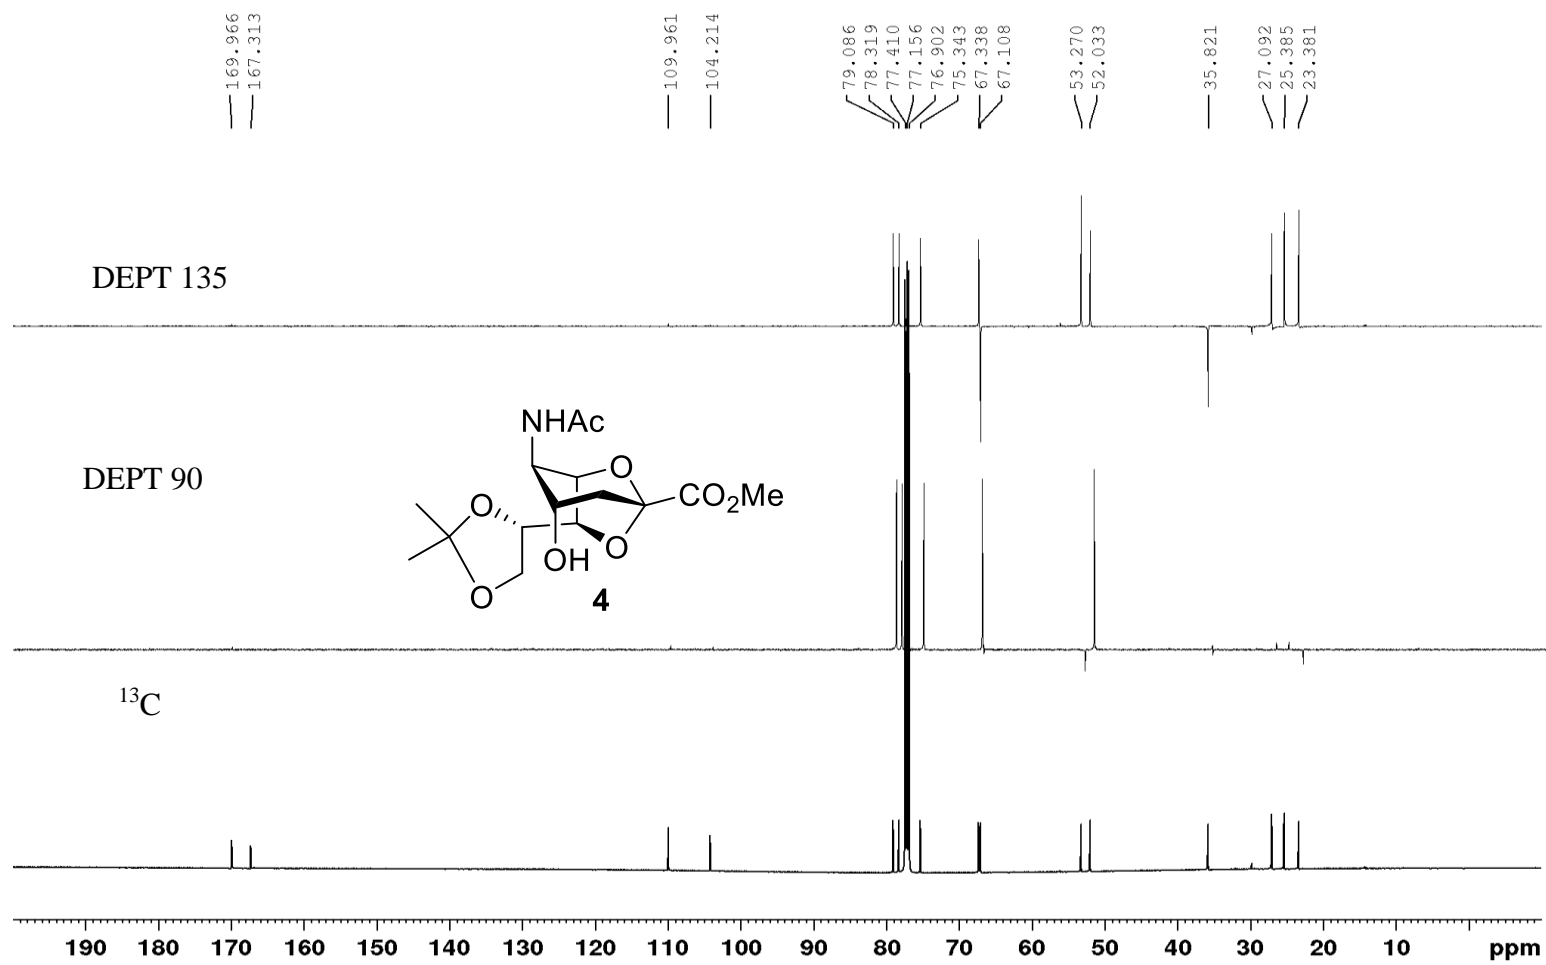

The <sup>13</sup>C NMR spectrum of compound **4**.



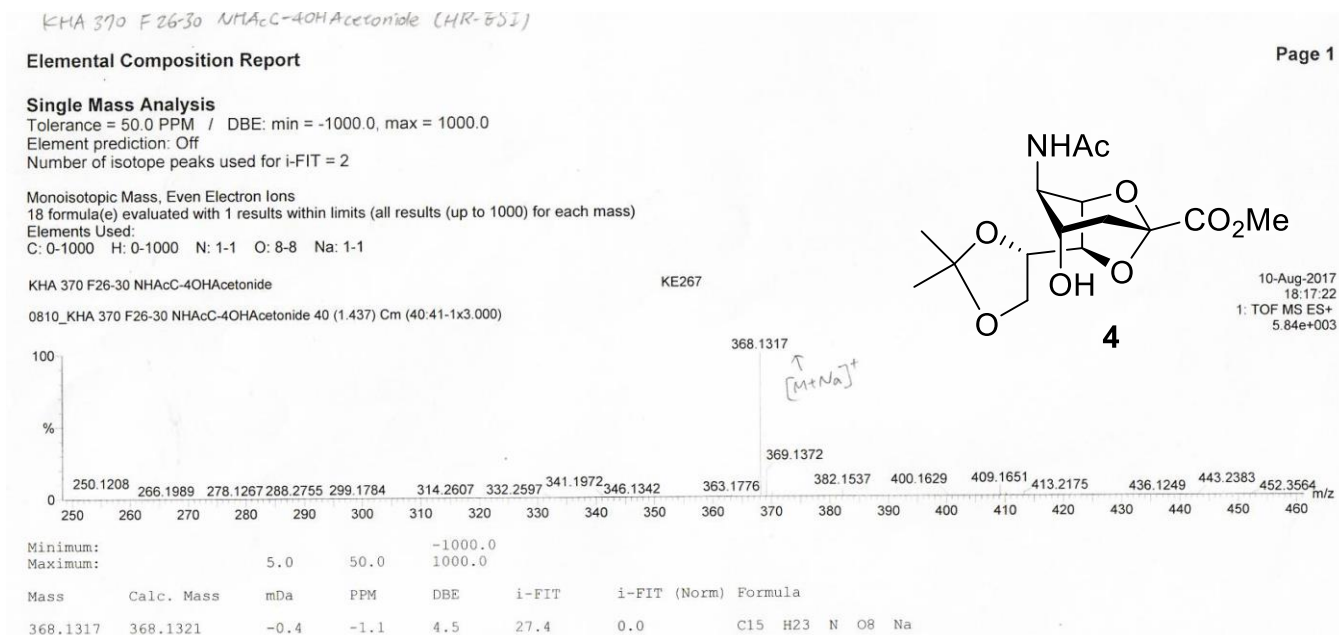

The HRMS spectrum of compound **4**.

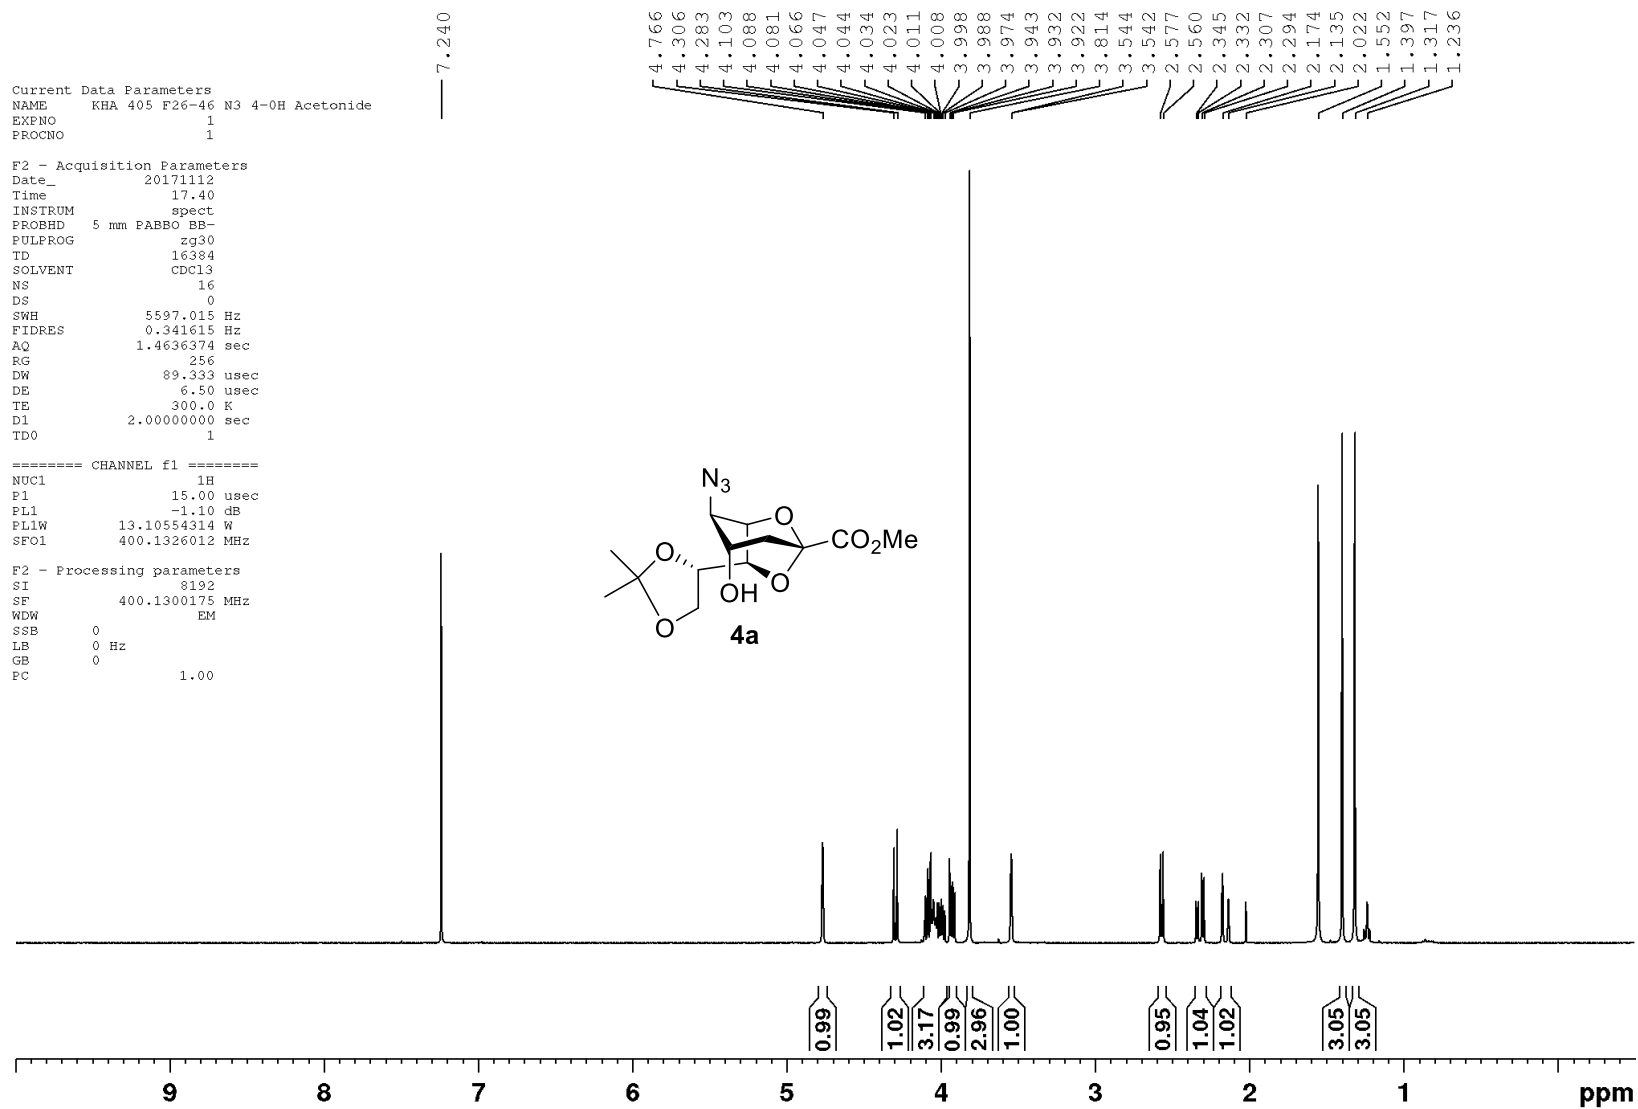

<sup>1</sup>H NMR spectrum of compound **4a** (500 MHz, CDCl<sub>3</sub>, 25 °C).

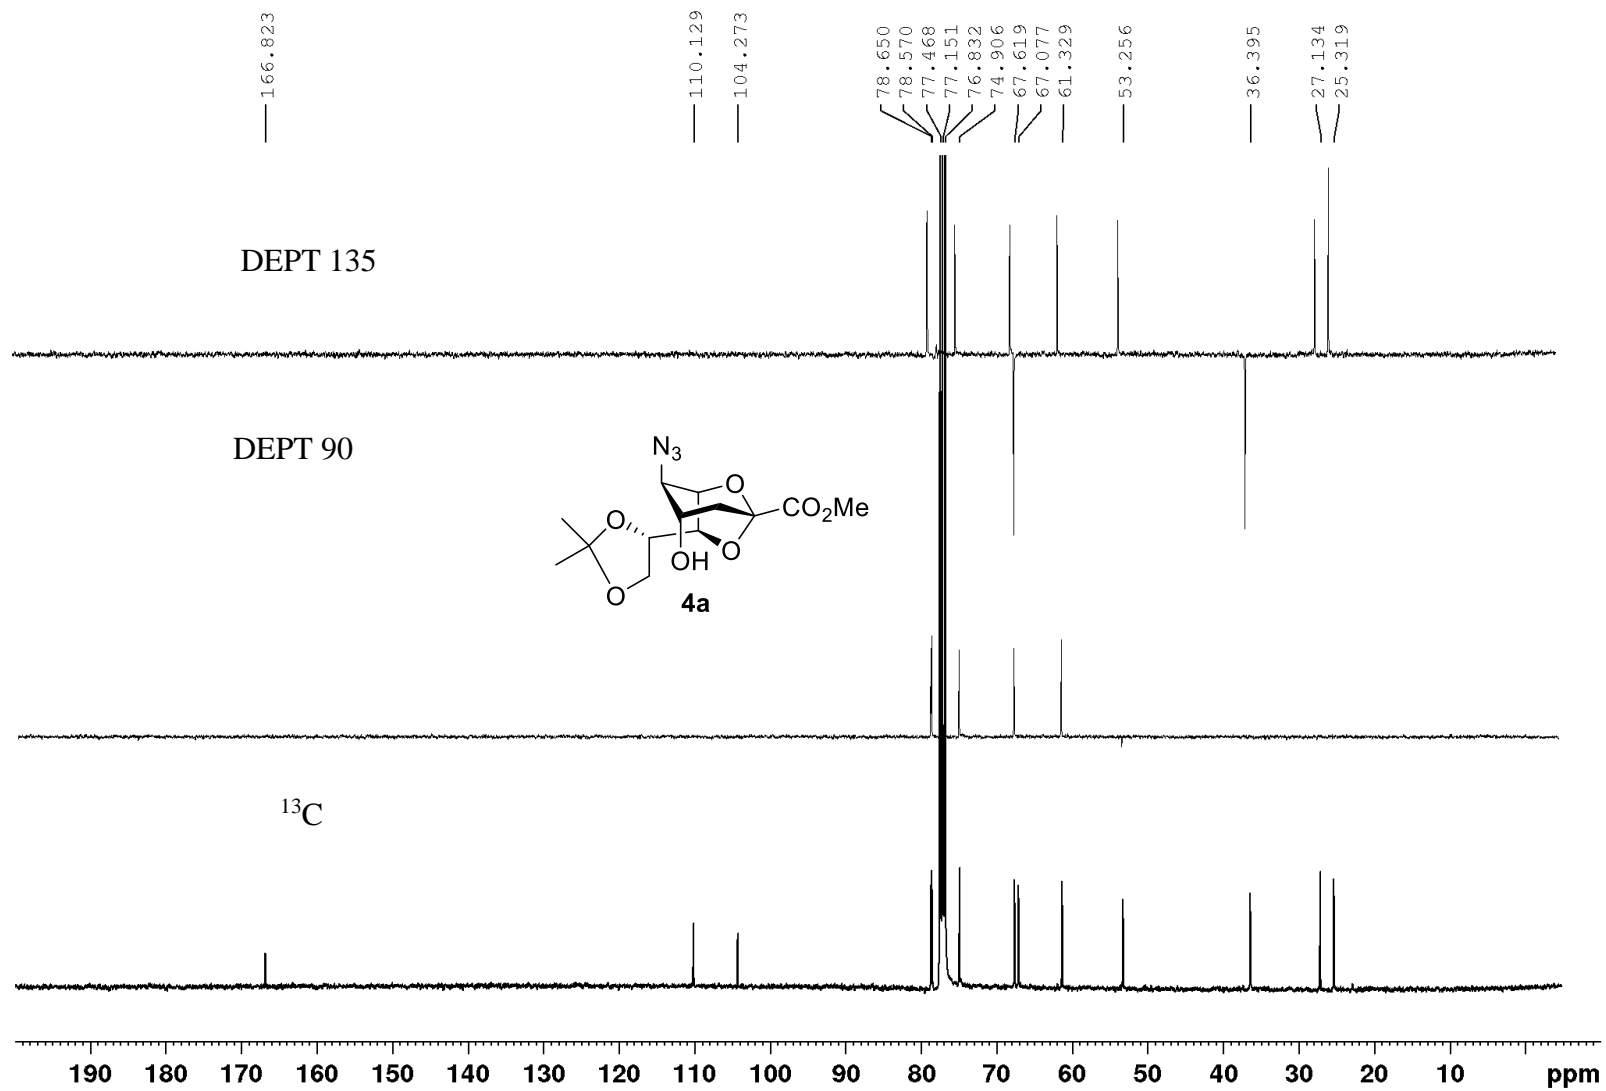

<sup>13</sup>C NMR spectrum of compound **4a** (125 MHz, CDCl<sub>3</sub>, 25 °C).

# Elemental Composition Report

Page 1

## Single Mass Analysis

Tolerance = 50.0 PPM / DBE: min = -1000.0, max = 1000.0

Element prediction: Off

Number of isotope peaks used for i-FIT = 2

Monoisotopic Mass, Even Electron Ions

15 formula(e) evaluated with 1 results within limits (all results (up to 1000) for each mass)

Elements Used:

C: 0-1000 H: 0-1000 N: 3-3 O: 7-7

KHA 371 F28-34 N3C-4OHAceonide

0810\_KHA 371 F28-34 N3C-4OHAceonide 26 (0.757) Cm (26-1)

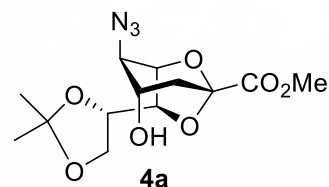

KE267

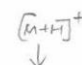

10-Aug-2017  
18:11:19  
2: TOF MS AP+  
2.72e+003

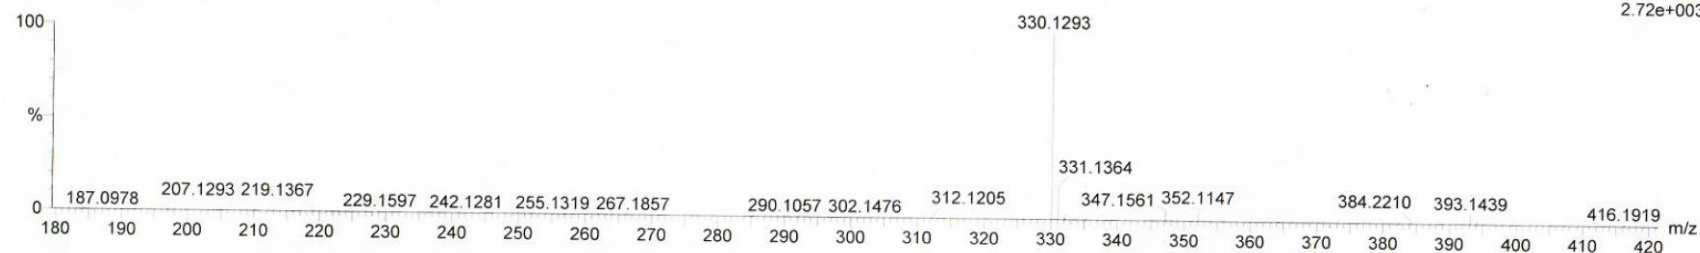

Minimum:  
Maximum:

| Mass     | Calc. Mass | mDa  | PPM  | DBE | i-FIT | i-FIT (Norm) | Formula       |
|----------|------------|------|------|-----|-------|--------------|---------------|
| 330.1293 | 330.1301   | -0.8 | -2.4 | 5.5 | 25.2  | 0.0          | C13 H20 N3 O7 |

The HRMS spectrum of compound **4a**.

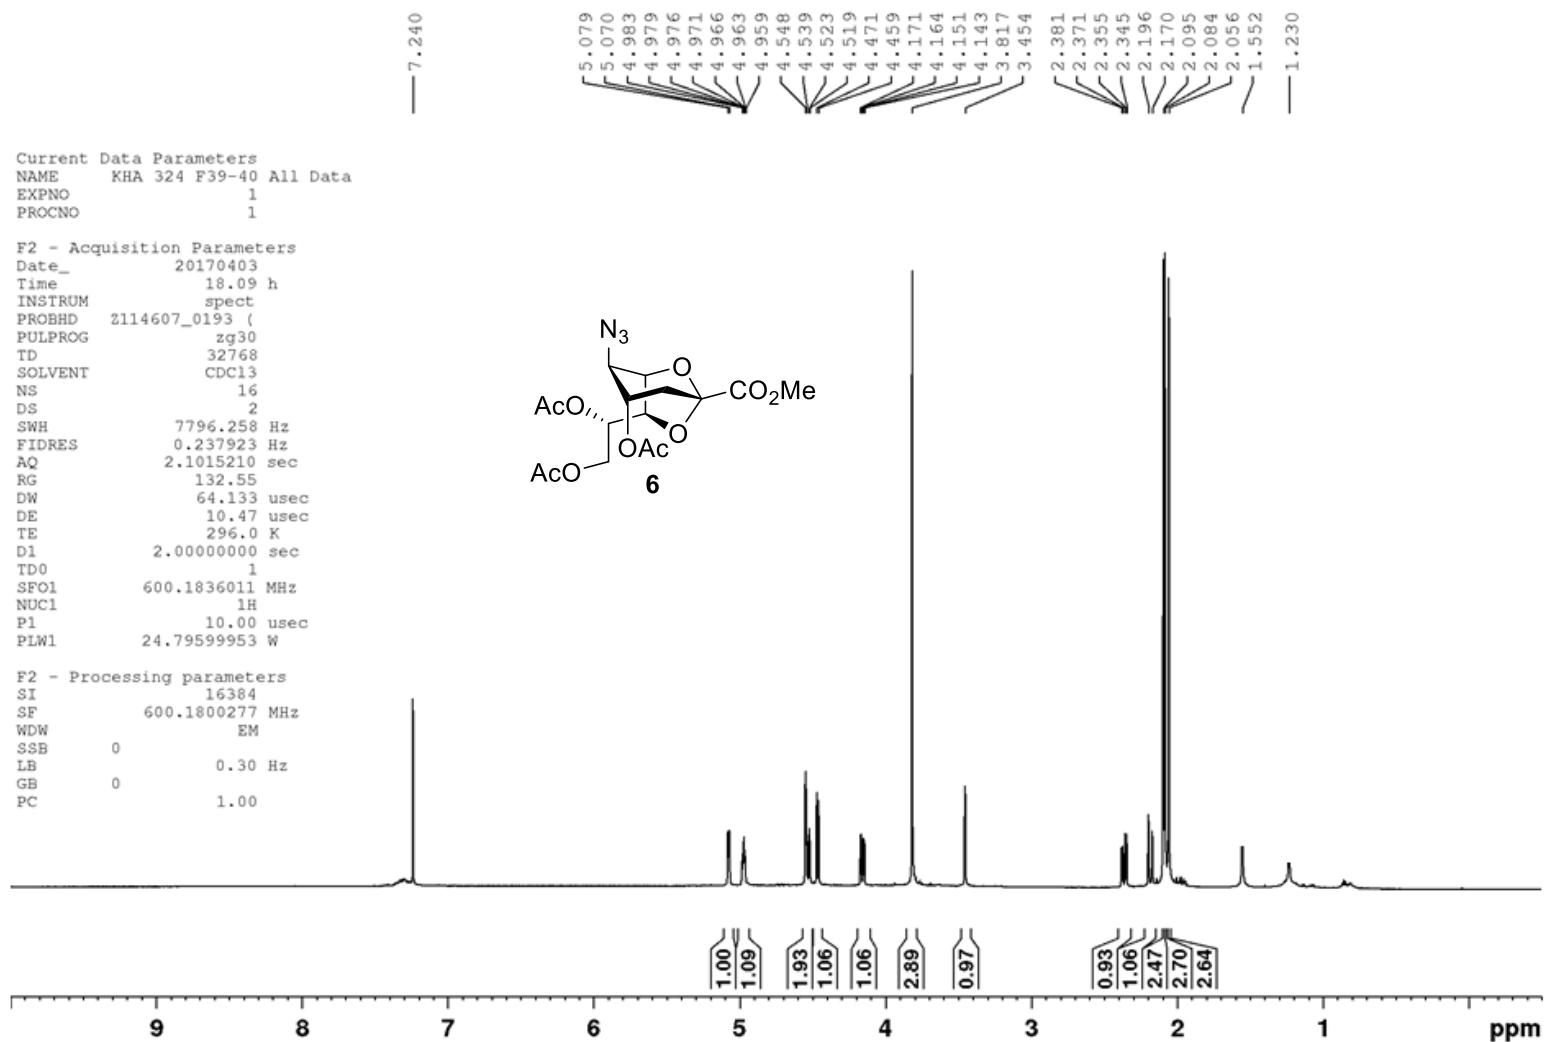

The <sup>1</sup>H NMR spectrum of compound **6**.

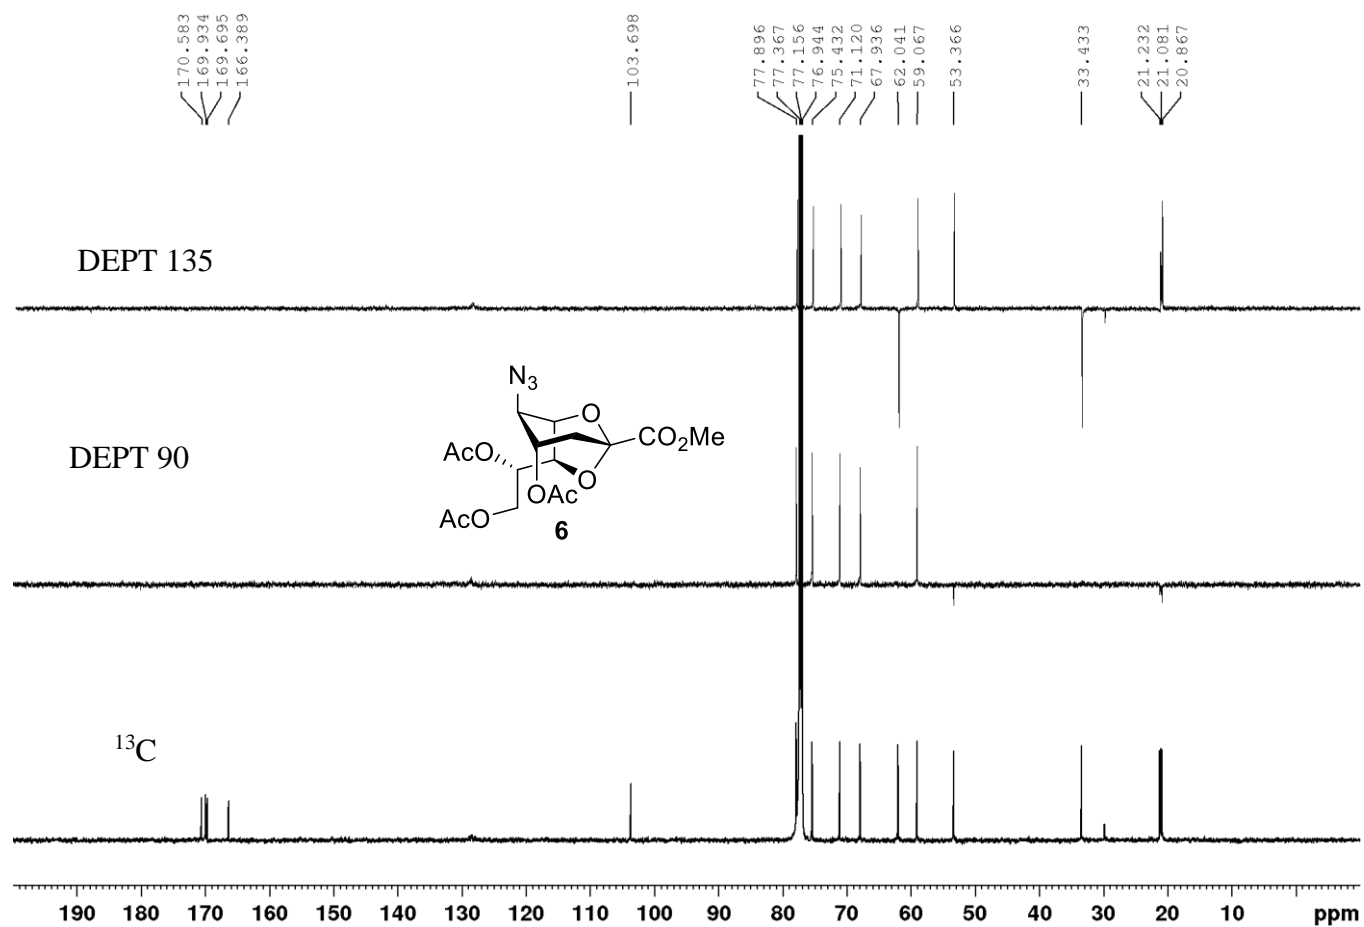

The  $^{13}\text{C}$  NMR spectrum of compound **6**.

# Elemental Composition Report

Page 1

## Single Mass Analysis

Tolerance = 30.0 PPM / DBE: min = -1000.0, max = 1000.0

Element prediction: Off

Number of isotope peaks used for i-FIT = 2

Monoisotopic Mass, Even Electron Ions

33 formula(e) evaluated with 1 results within limits (all results (up to 1000) for each mass)

Elements Used:

C: 1-2000 H: 0-2000 N: 3-3 O: 10-11 Na: 1-1

KHA 249B F15-16 3OAc N3

KE267

1005\_KHA 249B F15-16 3OAc N3 39 (3.134) Cm (39-1x10.000)

05-Oct-2016  
17:47:45  
1: TOF MS ES+  
2.47e+003

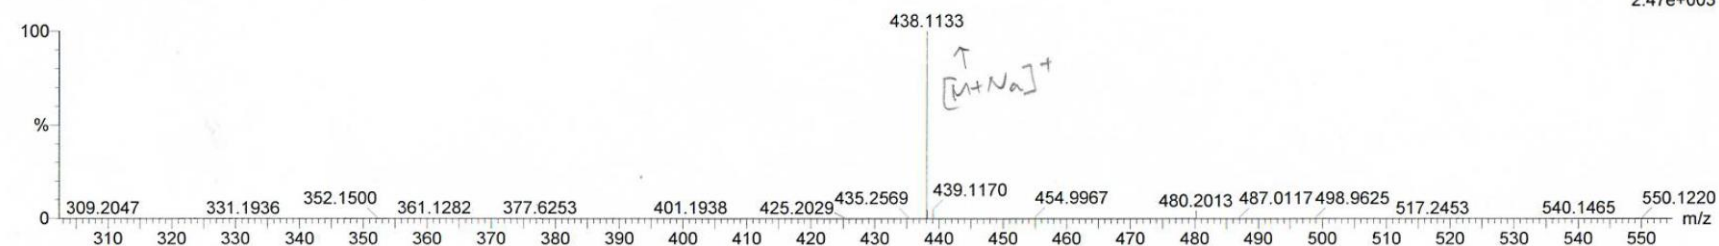

Minimum: -1000.0  
Maximum: 5.0 30.0 1000.0

| Mass     | Calc. Mass | mDa | PPM | DBE | i-FIT | i-FIT (Norm) | Formula           |
|----------|------------|-----|-----|-----|-------|--------------|-------------------|
| 438.1133 | 438.1125   | 0.8 | 1.8 | 7.5 | 27.5  | 0.0          | C16 H21 N3 O10 Na |

The HRMS spectrum of compound **6**.

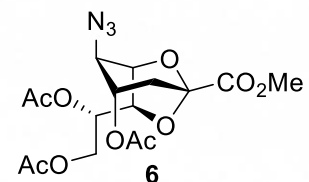

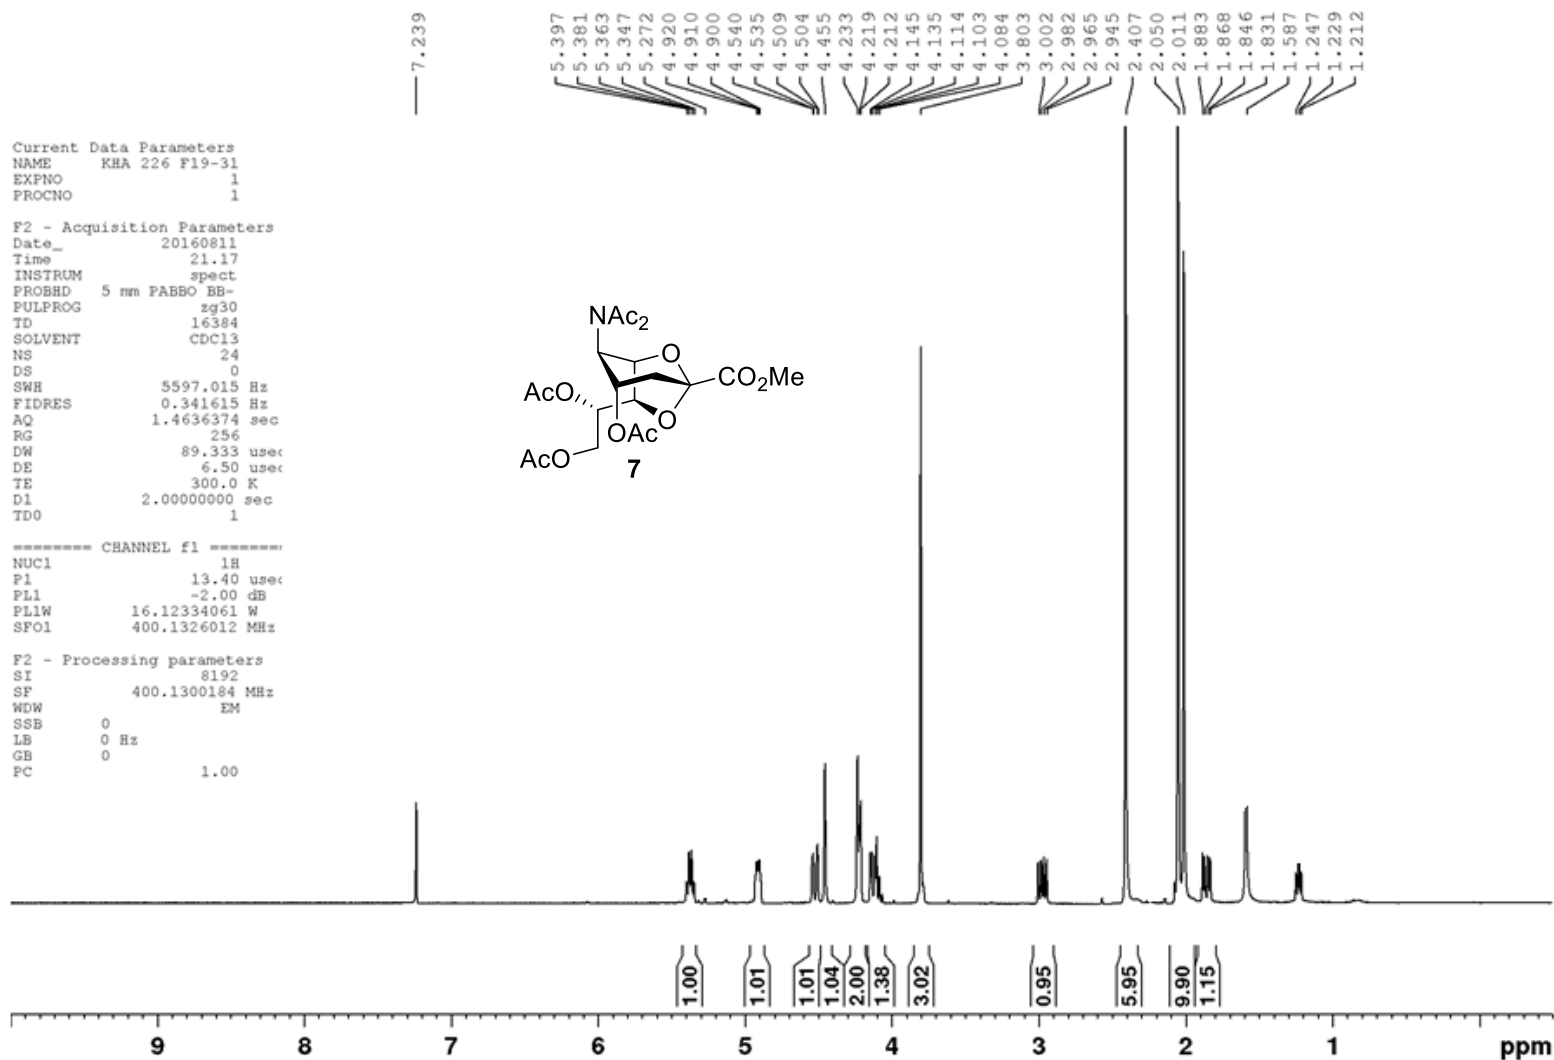

The <sup>1</sup>H NMR spectrum of compound 7.



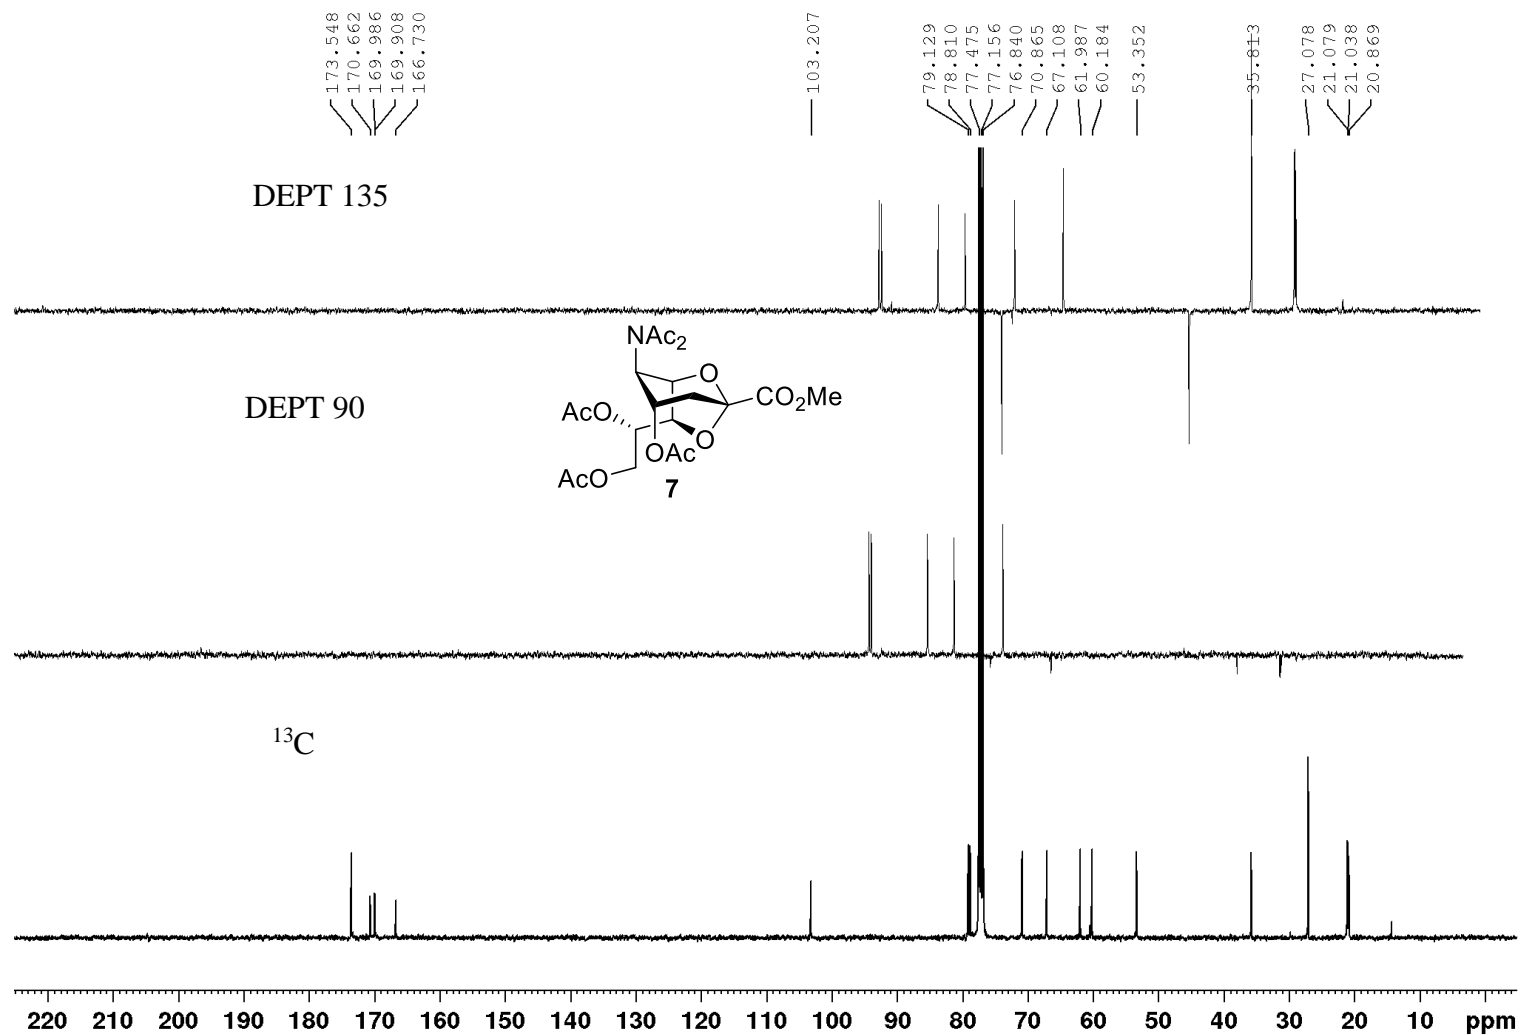

The <sup>13</sup>C NMR spectrum of compound 7.

# Elemental Composition Report

Page 1

## Single Mass Analysis

Tolerance = 50.0 PPM / DBE: min = -1000.0, max = 1000.0

Element prediction: Off

Number of isotope peaks used for i-FIT = 2

Monoisotopic Mass, Even Electron Ions

22 formula(e) evaluated with 1 results within limits (all results (up to 1000) for each mass)

Elements Used:

C: 1-1000 H: 0-4000 N: 1-1 O: 12-12 Na: 1-1

KHA 224 F13-16 NAc2

0909\_KHA 224 F13-16 NAc2 6 (0.479) Cm (6-7)

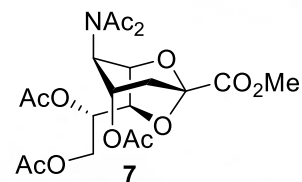

09-Sep-2016  
17:09:02  
1: TOF MS ES+  
5.74e+003

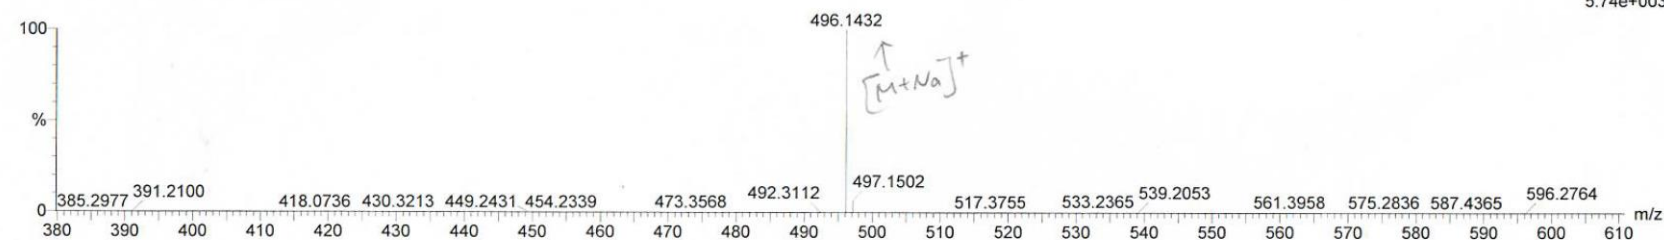

Minimum: -1000.0  
Maximum: 5.0 50.0 1000.0

| Mass     | Calc. Mass | mDa | PPM | DBE | i-FIT | i-FIT (Norm) | Formula                                              |
|----------|------------|-----|-----|-----|-------|--------------|------------------------------------------------------|
| 496.1432 | 496.1431   | 0.1 | 0.2 | 7.5 | 25.6  | 0.0          | C <sub>20</sub> H <sub>27</sub> N O <sub>12</sub> Na |

The HRMS spectrum of compound 7.

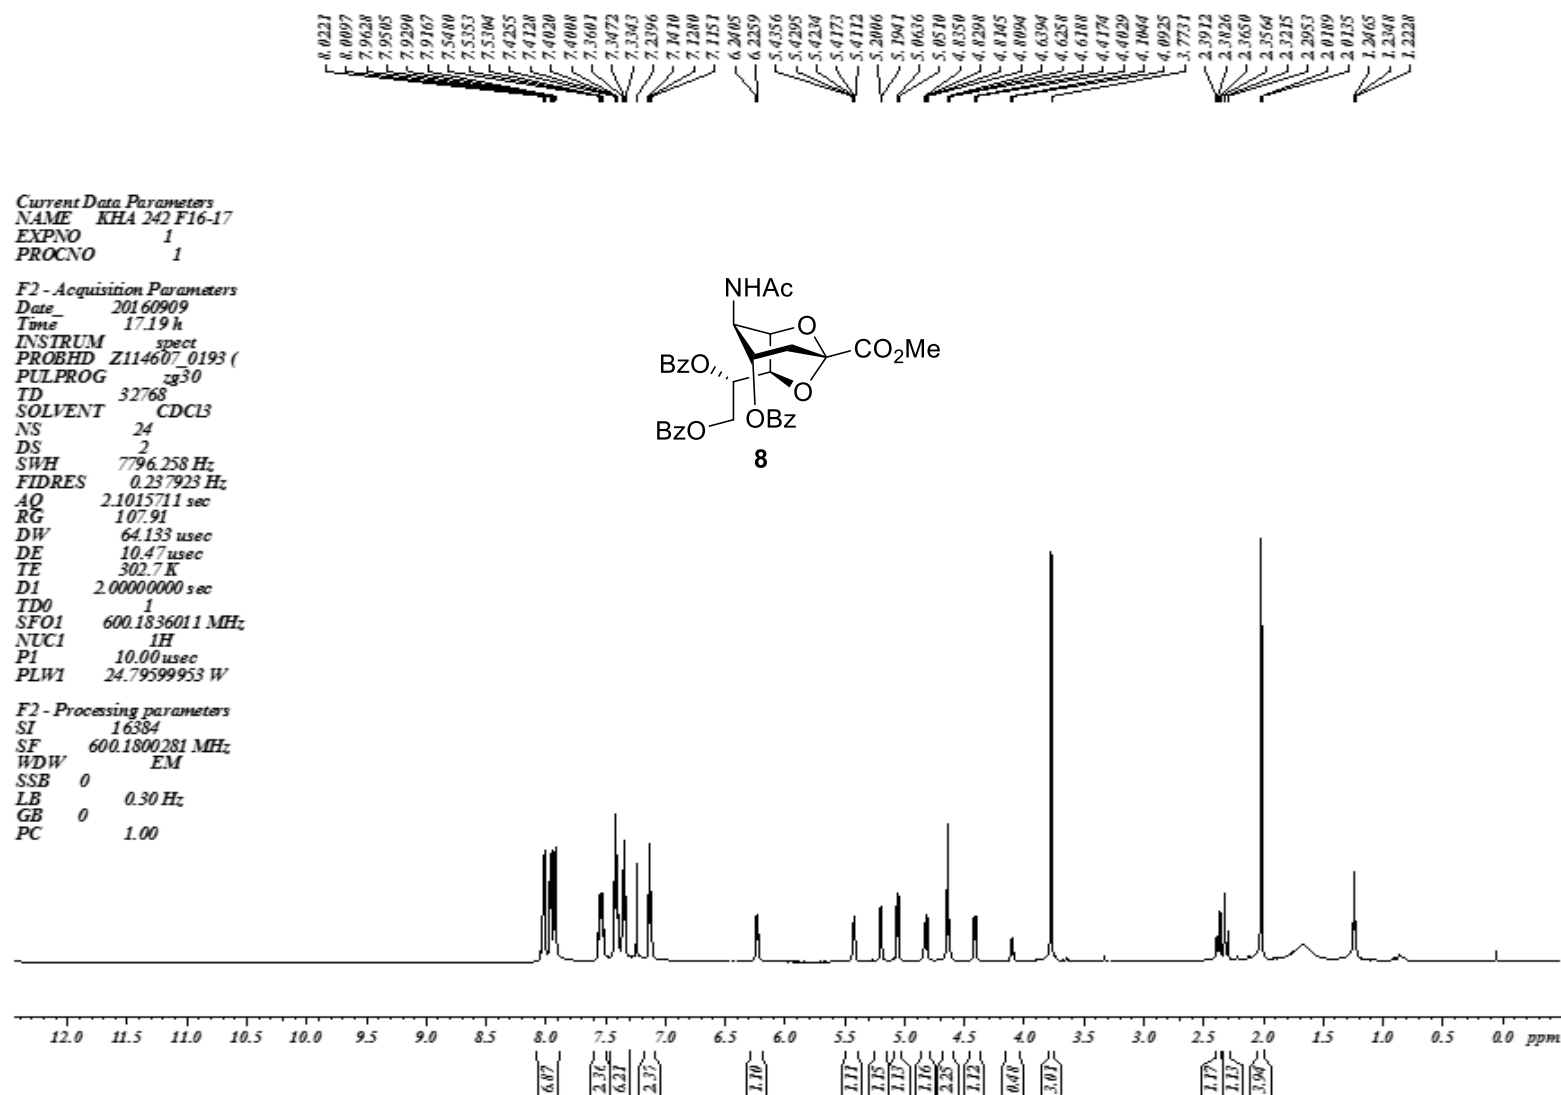

The  $^1\text{H}$  NMR spectrum of compound **8**.

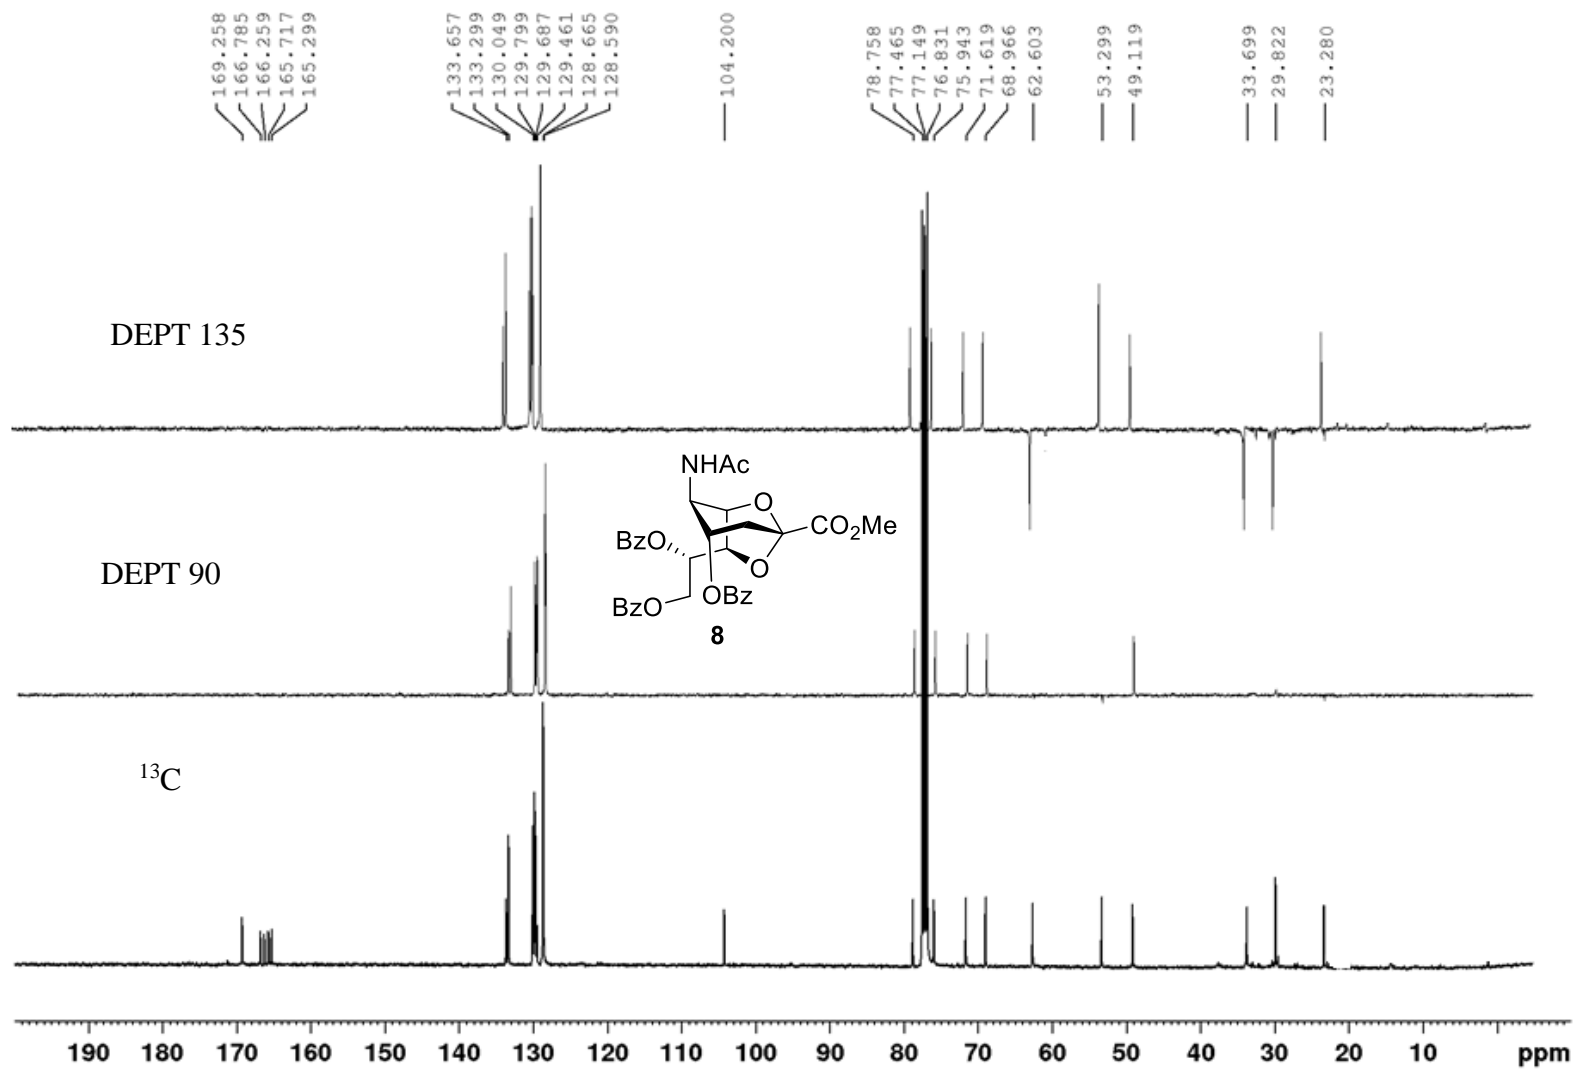

The  $^{13}\text{C}$  NMR spectrum of compound **8**.

# Elemental Composition Report

Page 1

## Single Mass Analysis

Tolerance = 50.0 PPM / DBE: min = -1000.0, max = 1000.0

Element prediction: Off

Number of isotope peaks used for i-FIT = 2

Monoisotopic Mass, Even Electron Ions

35 formula(e) evaluated with 1 results within limits (all results (up to 1000) for each mass)

Elements Used:

C: 1-1000 H: 0-4000 N: 1-1 O: 11-11 Na: 1-1

KHA 238 F14-16 3OBzNHAc

KE267

0909\_KHA 238 F14-16 3OBzNHAc 17 (1.387) Cm (17-26x2.000)

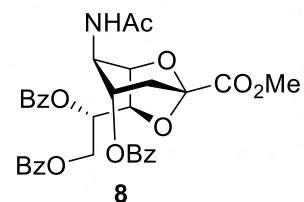

09-Sep-2016  
17:05:05  
1: TOF MS ES+  
2.11e+002

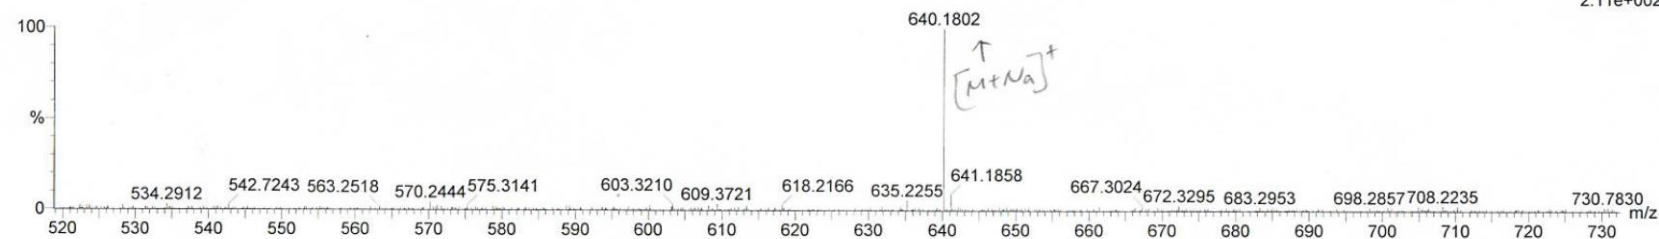

Minimum: -1000.0  
Maximum: 1000.0

| Mass     | Calc. Mass | mDa | PPM | DBE  | i-FIT | i-FIT (Norm) | Formula          |
|----------|------------|-----|-----|------|-------|--------------|------------------|
| 640.1802 | 640.1795   | 0.7 | 1.1 | 18.5 | 25.5  | 0.0          | C33 H31 N O11 Na |

The HRMS spectrum of compound **8**.

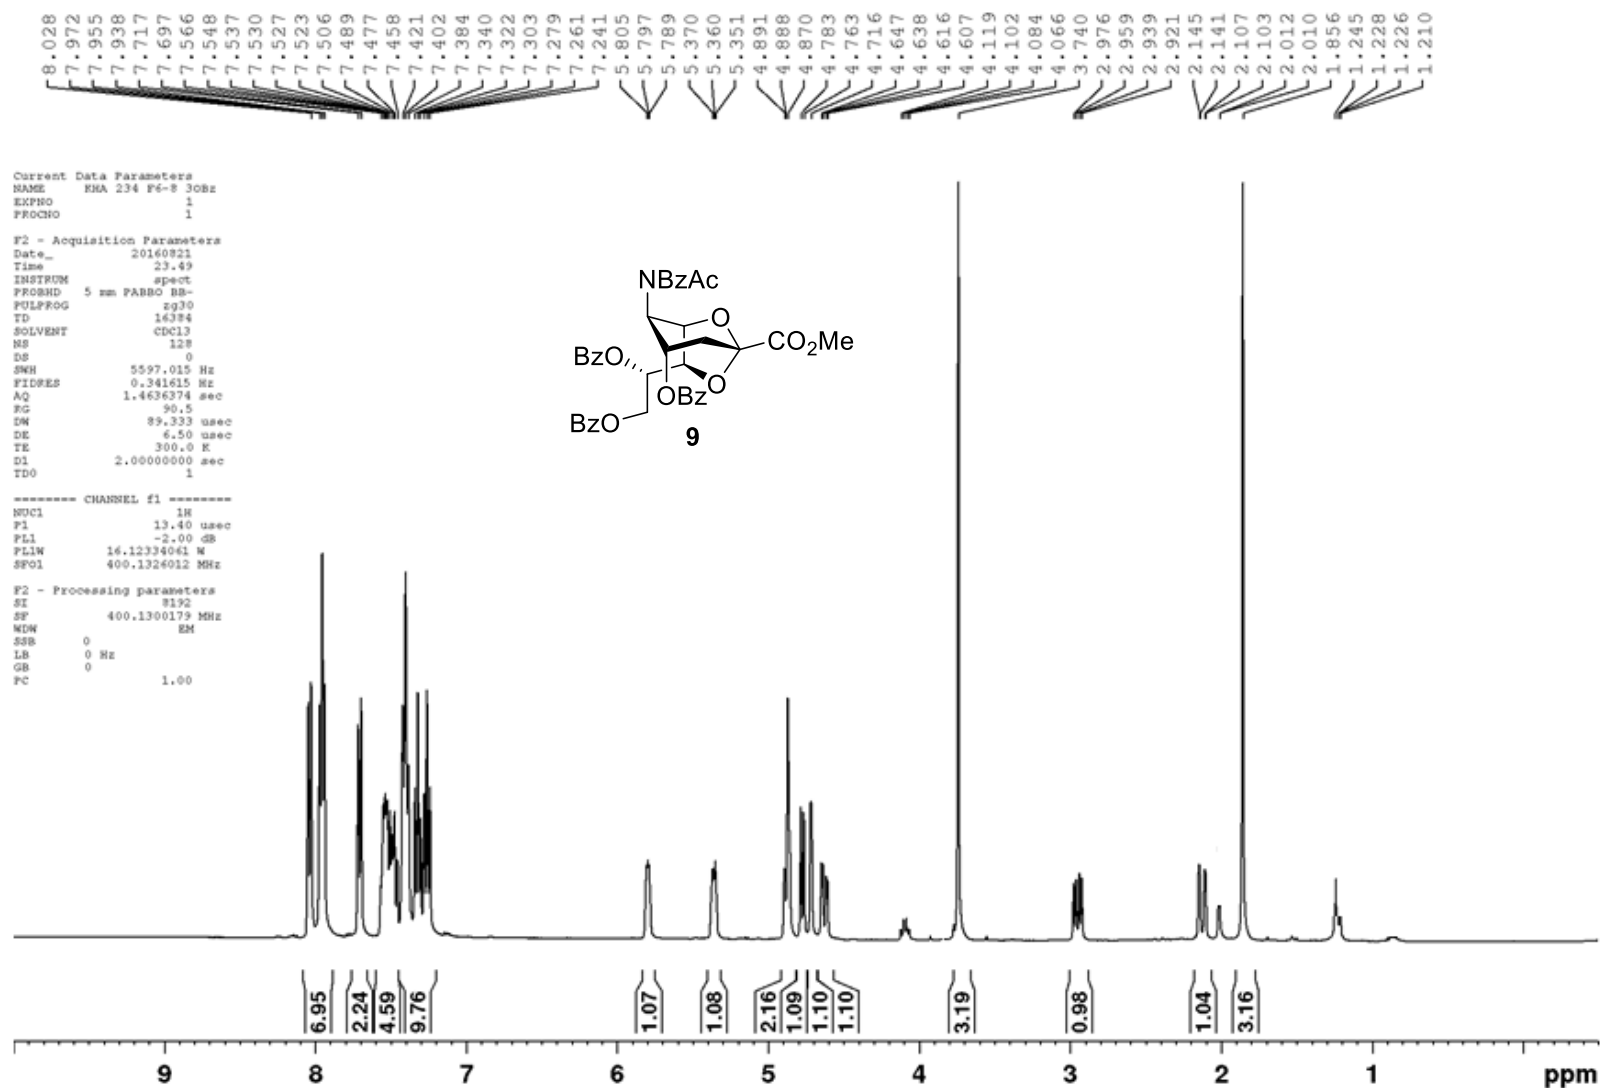

The  $^1\text{H}$  NMR spectrum of compound **9**.

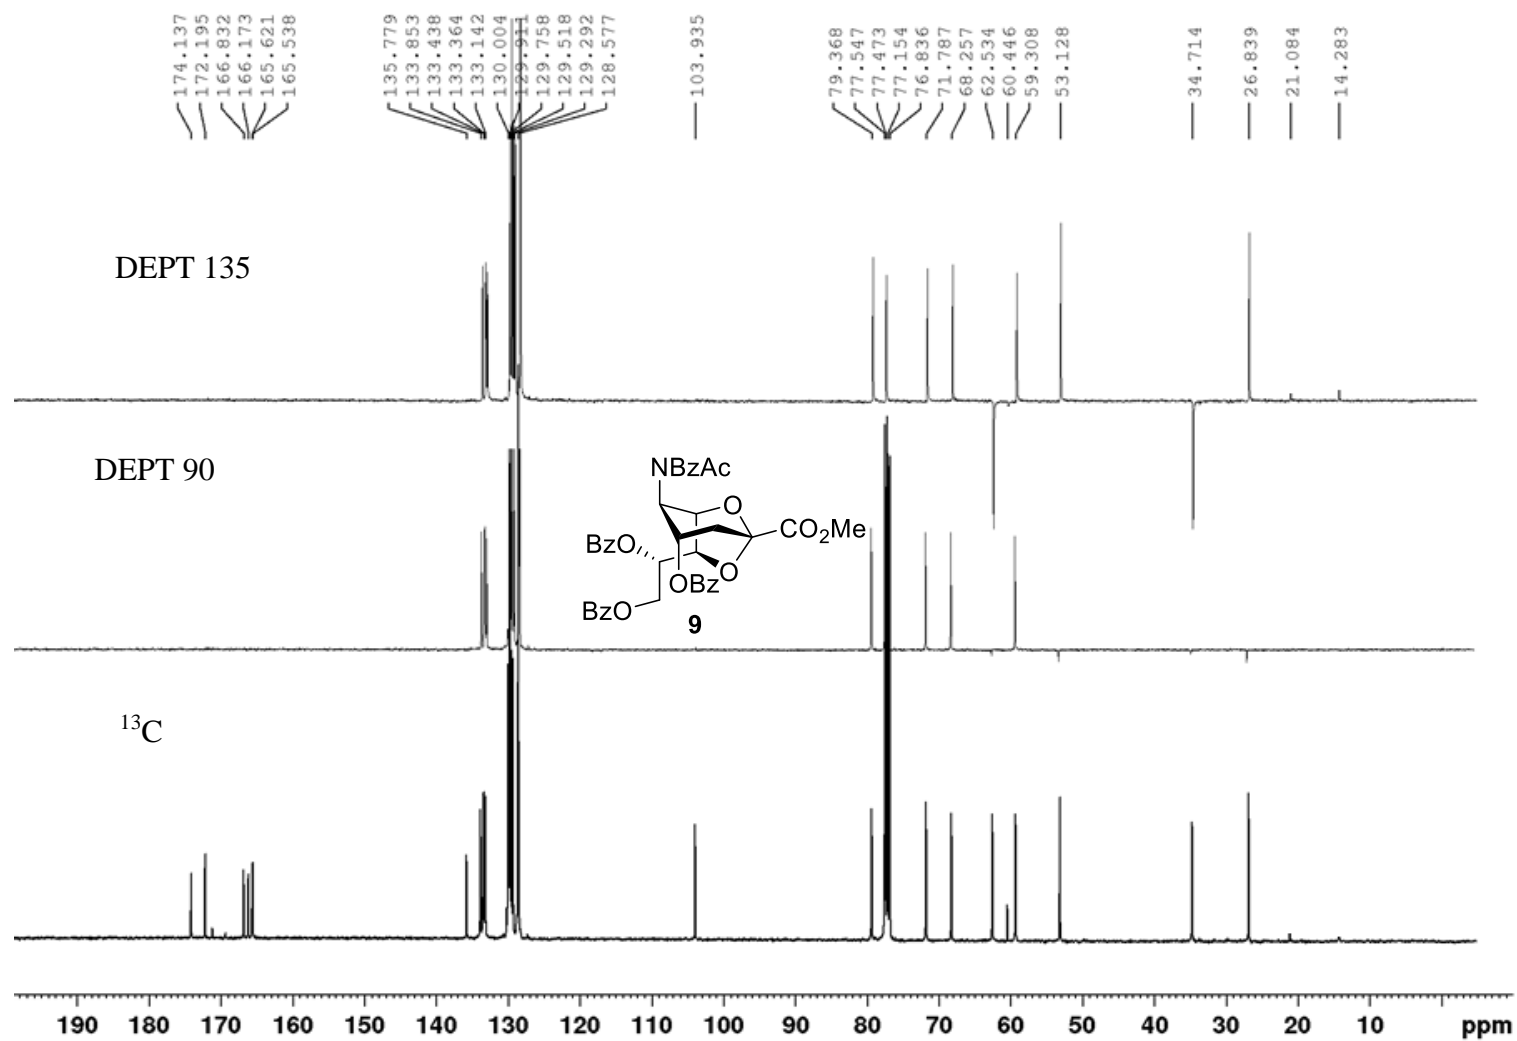

The  $^{13}\text{C}$  NMR spectrum of compound **9**.

KHA 234 F6-8 3OBzNBzAc (HR-ESI)

## Elemental Composition Report

### Single Mass Analysis

Tolerance = 4.0 PPM / DBE: min = -1000.0, max = 1000.0

Element prediction: Off

Number of isotope peaks used for i-FIT = 2

Monoisotopic Mass, Even Electron Ions

44 formula(e) evaluated with 1 results within limits (all results (up to 1000) for each mass)

Elements Used:

C: 0-10000 H: 0-10000 N: 1-1 O: 12-12 Na: 1-1

KHA 234 F6-8 3OBzNBzAc

KE267

Page 1

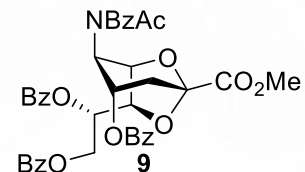

0511\_KHA 234 F6-8 3OBzNBzAc 28 (0.999) Cm (25:28)

11-May-2017  
14:22:53  
1: TOF MS ES+  
6.67e+002

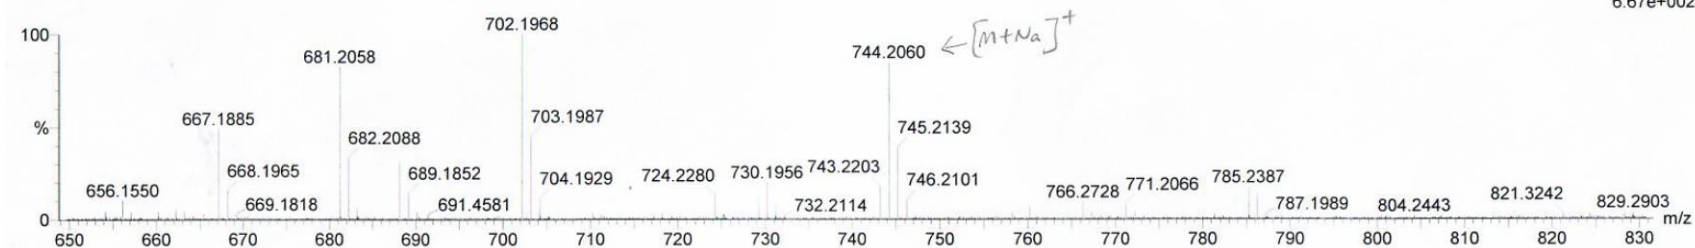

Minimum: -1000.0  
Maximum: 1000.0

| Mass     | Calc. Mass | mDa | PPM | DBE  | i-FIT | i-FIT (Norm) | Formula          |
|----------|------------|-----|-----|------|-------|--------------|------------------|
| 744.2060 | 744.2057   | 0.3 | 0.4 | 23.5 | 55.5  | 0.0          | C40 H35 N O12 Na |

The HRMS spectrum of compound 9.



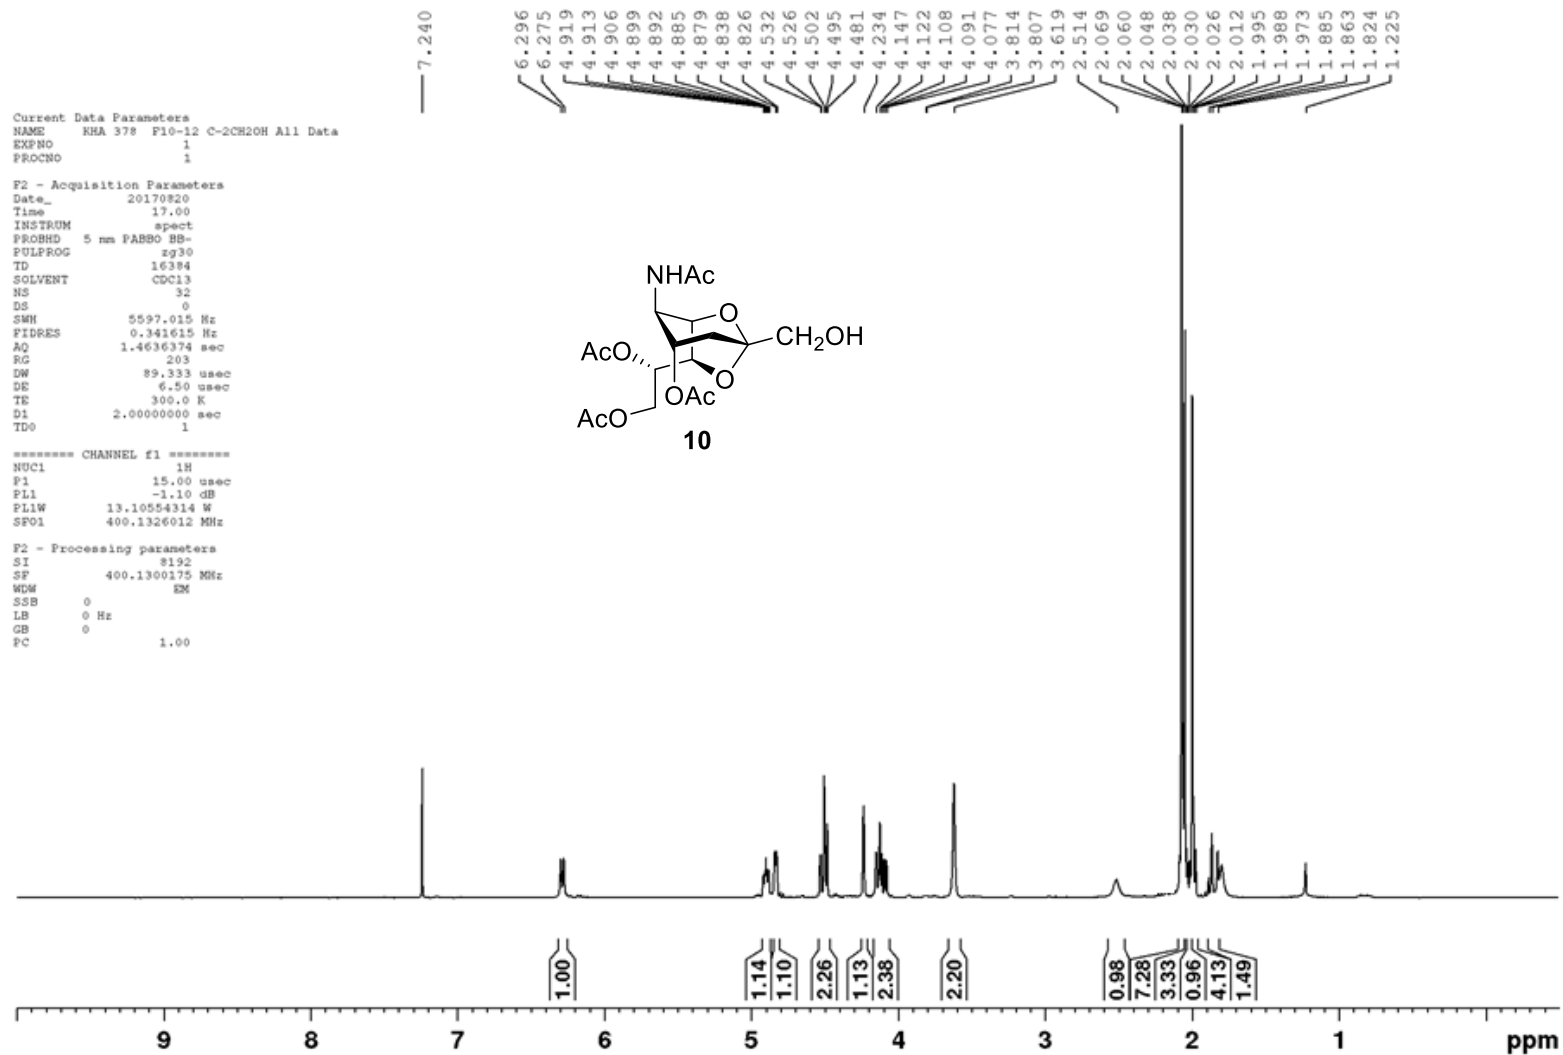

The <sup>1</sup>H NMR spectrum of compound 10.

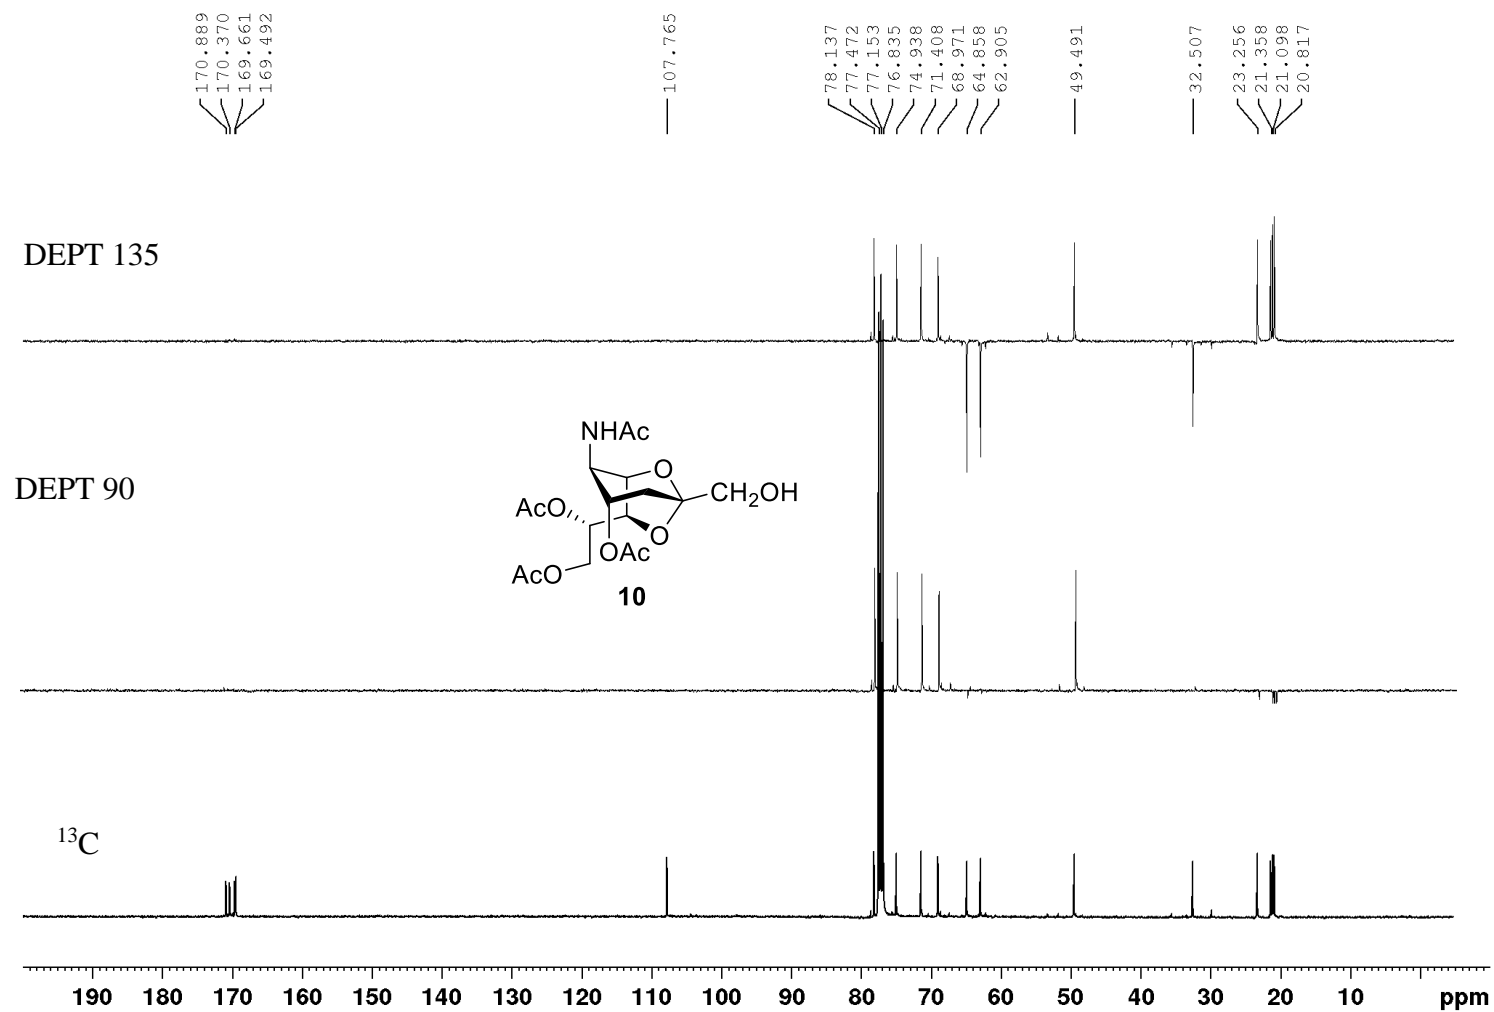

The <sup>13</sup>C NMR spectrum of compound **10**.

KHA 378 F10-12C-2CH<sub>2</sub>OH (HR-ESI)

## Elemental Composition Report

### Single Mass Analysis

Tolerance = 5.0 PPM / DBE: min = -1.5, max = 50.0

Element prediction: Off

Number of isotope peaks used for i-FIT = 3

Monoisotopic Mass, Even Electron Ions

8 formula(e) evaluated with 1 results within limits (up to 50 best isotopic matches for each mass)

Elements Used:

C: 0-500 H: 0-1000 N: 1-1 O: 10-10 Na: 0-1

KHA 378 F10-11 C-2CH<sub>2</sub>OH

0828\_KHA 378 F10-11 C-2CH<sub>2</sub>OH 49 (1.786)

Page 1

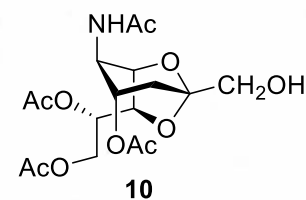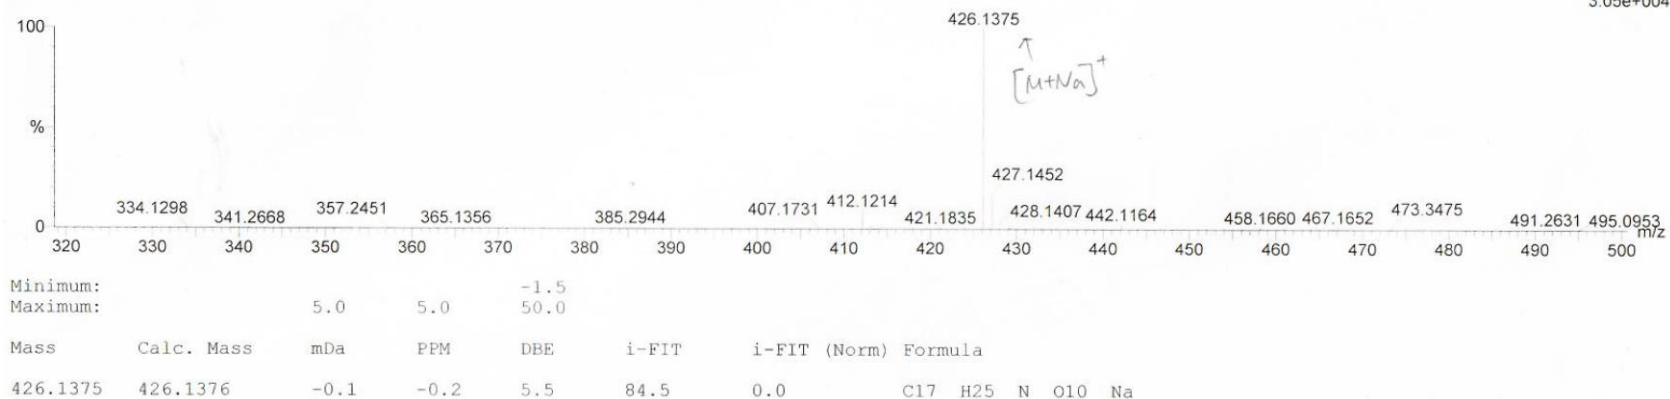

The HRMS spectrum of compound **10**.

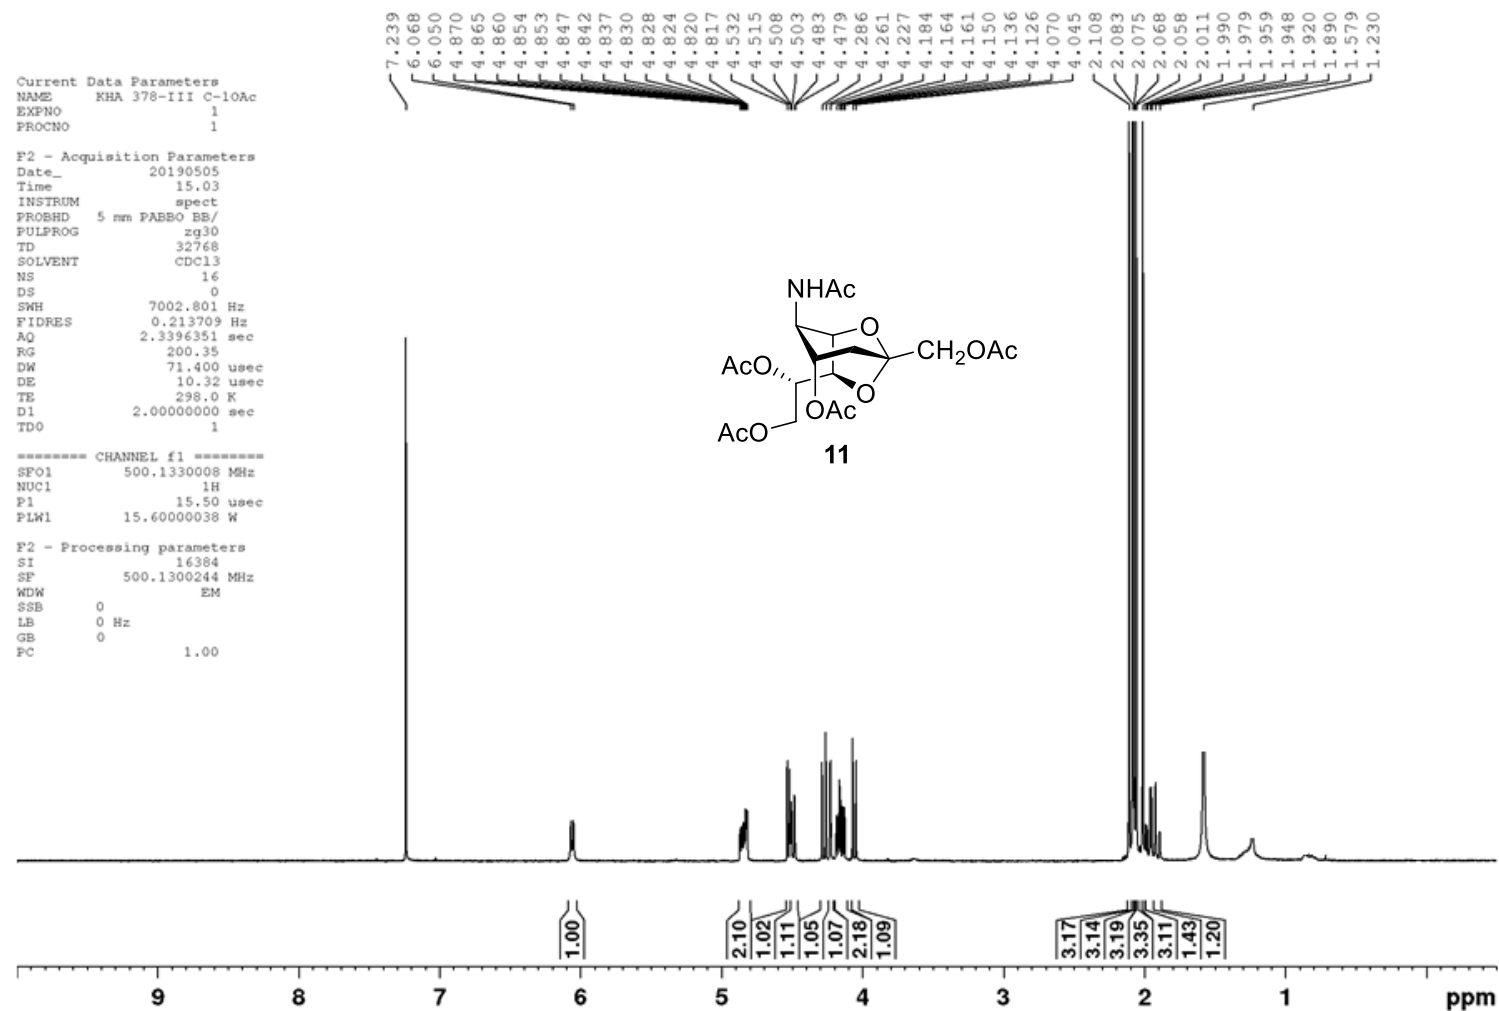

The  $^1\text{H}$  NMR spectrum of compound 11.

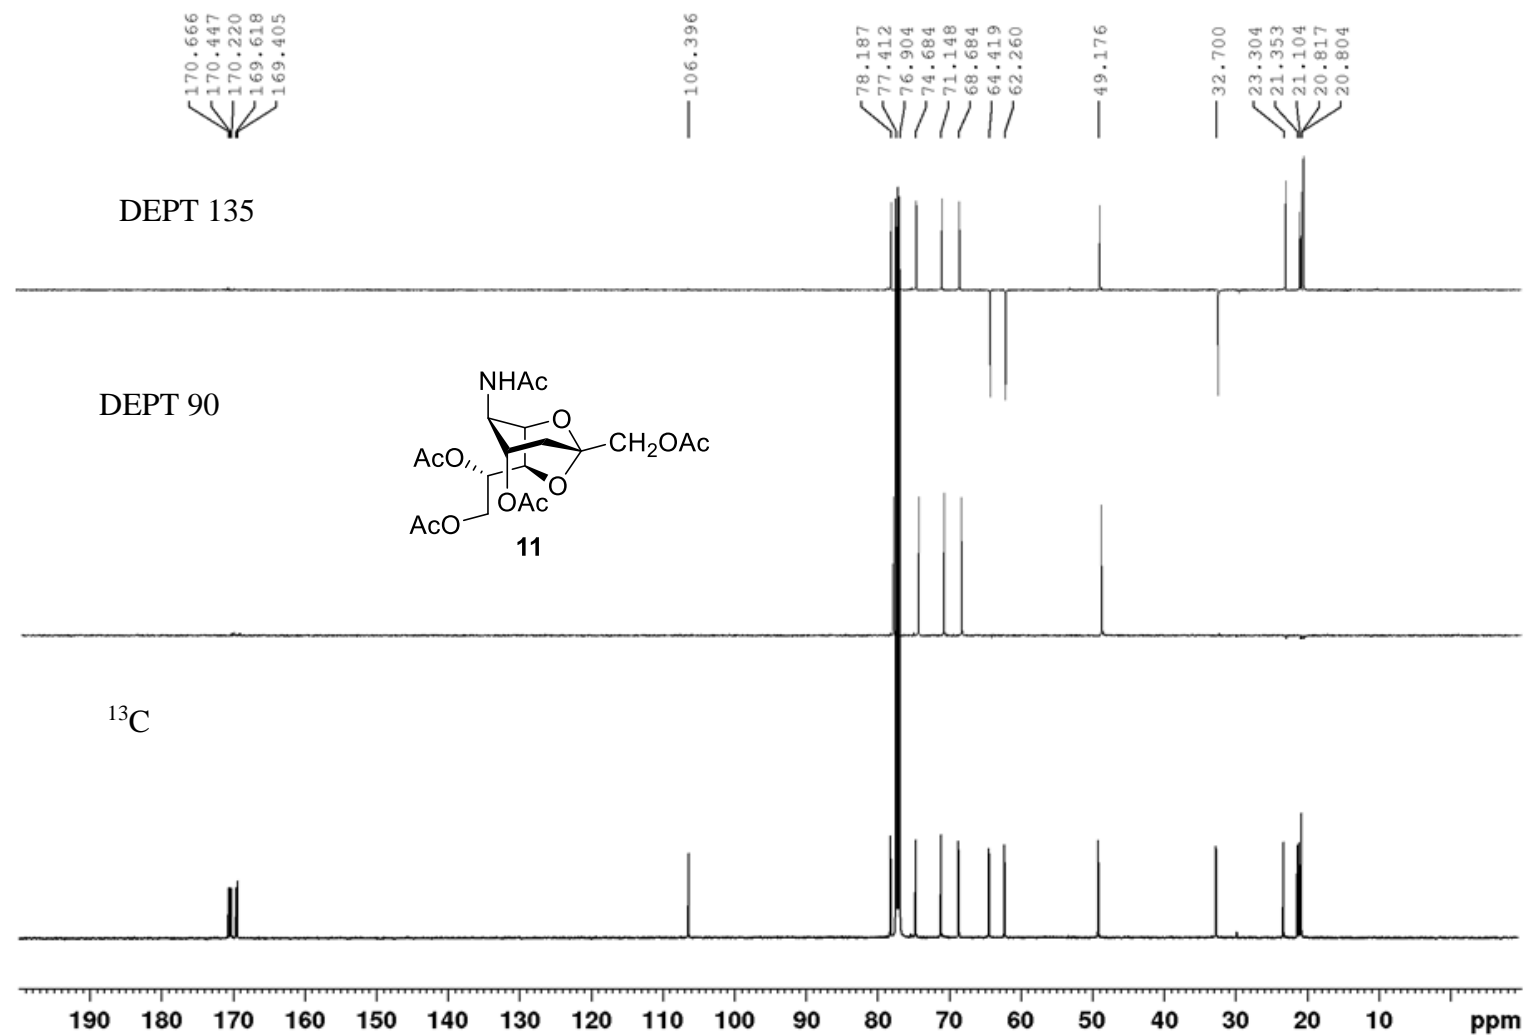

The <sup>13</sup>C NMR spectrum of compound **11**.

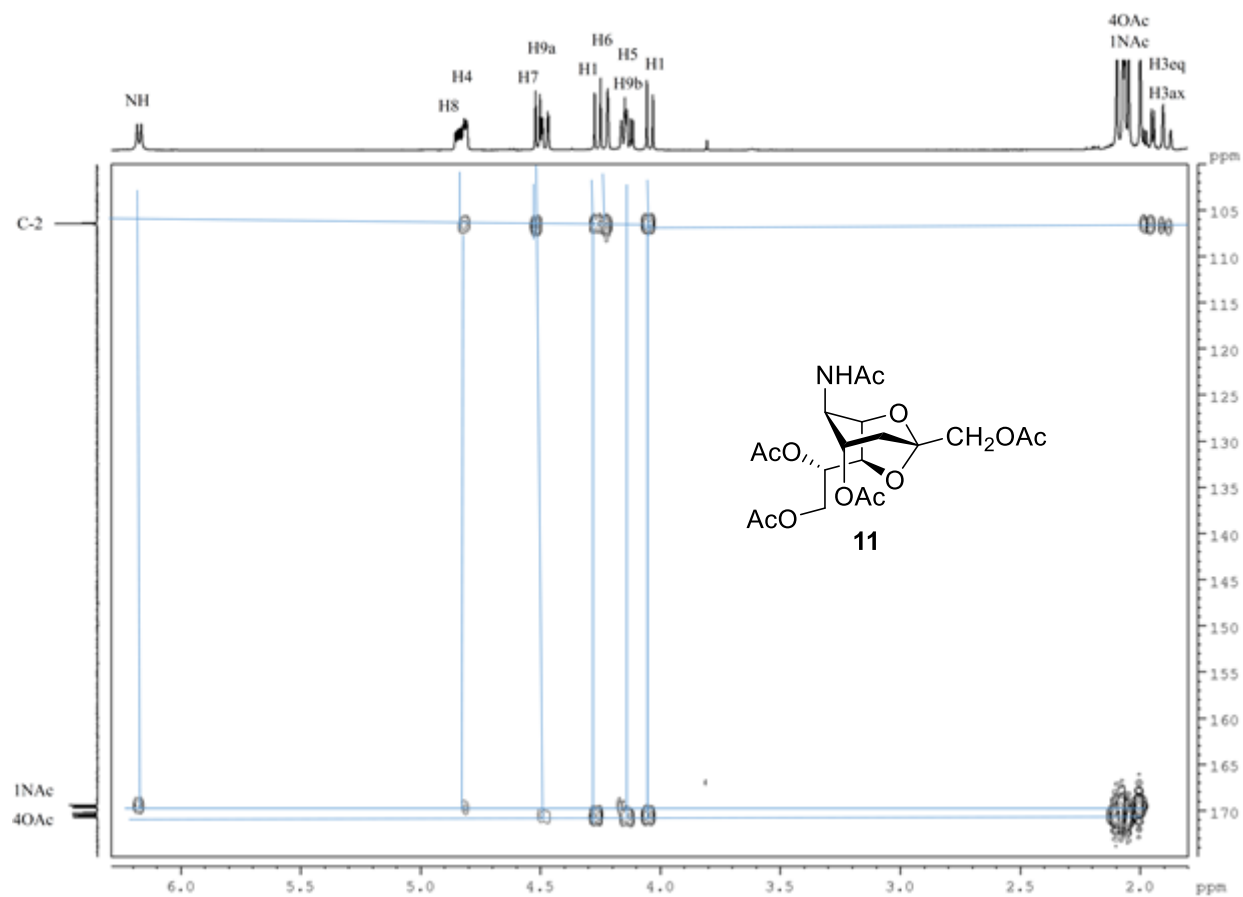

The HMBC NMR spectrum of compound **11**.

## Spectrum

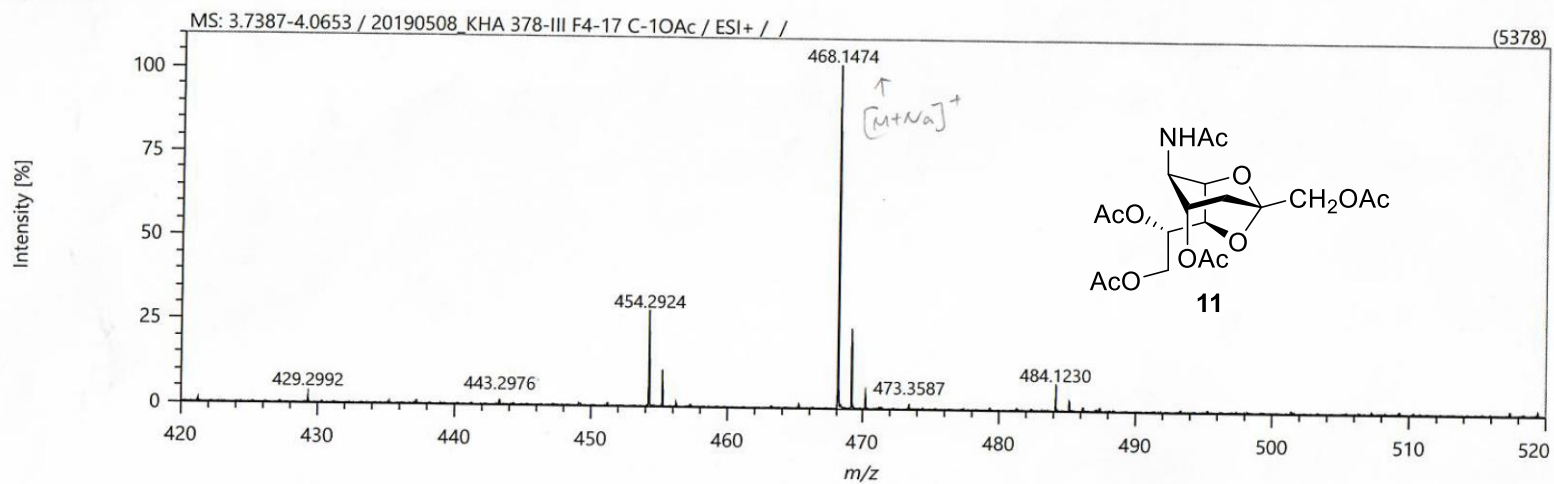

## Elemental Composition

## Parameters

Tolerance: ±20.00 ppm  
 Electron: Odd/Even  
 Charge: +1  
 DBE: -1.5 - 999.0

## Elements Set 1:

| Symbol | C   | H    | O  | Na | Cl | F | N | S |
|--------|-----|------|----|----|----|---|---|---|
| Min    | 0   | 0    | 11 | 1  | 0  | 0 | 1 | 0 |
| Max    | 400 | 1000 | 11 | 1  | 0  | 0 | 1 | 0 |

## Results

| Mass      | Formula                                              | Calculated Mass | Mass Difference [mDa] | Mass Difference [ppm] | DBE |
|-----------|------------------------------------------------------|-----------------|-----------------------|-----------------------|-----|
| 468.14741 | C <sub>19</sub> H <sub>27</sub> N O <sub>11</sub> Na | 468.14763       | -0.22                 | -0.47                 | 6.5 |

1NAc

4OAc

The HRMS spectrum of compound **11**.

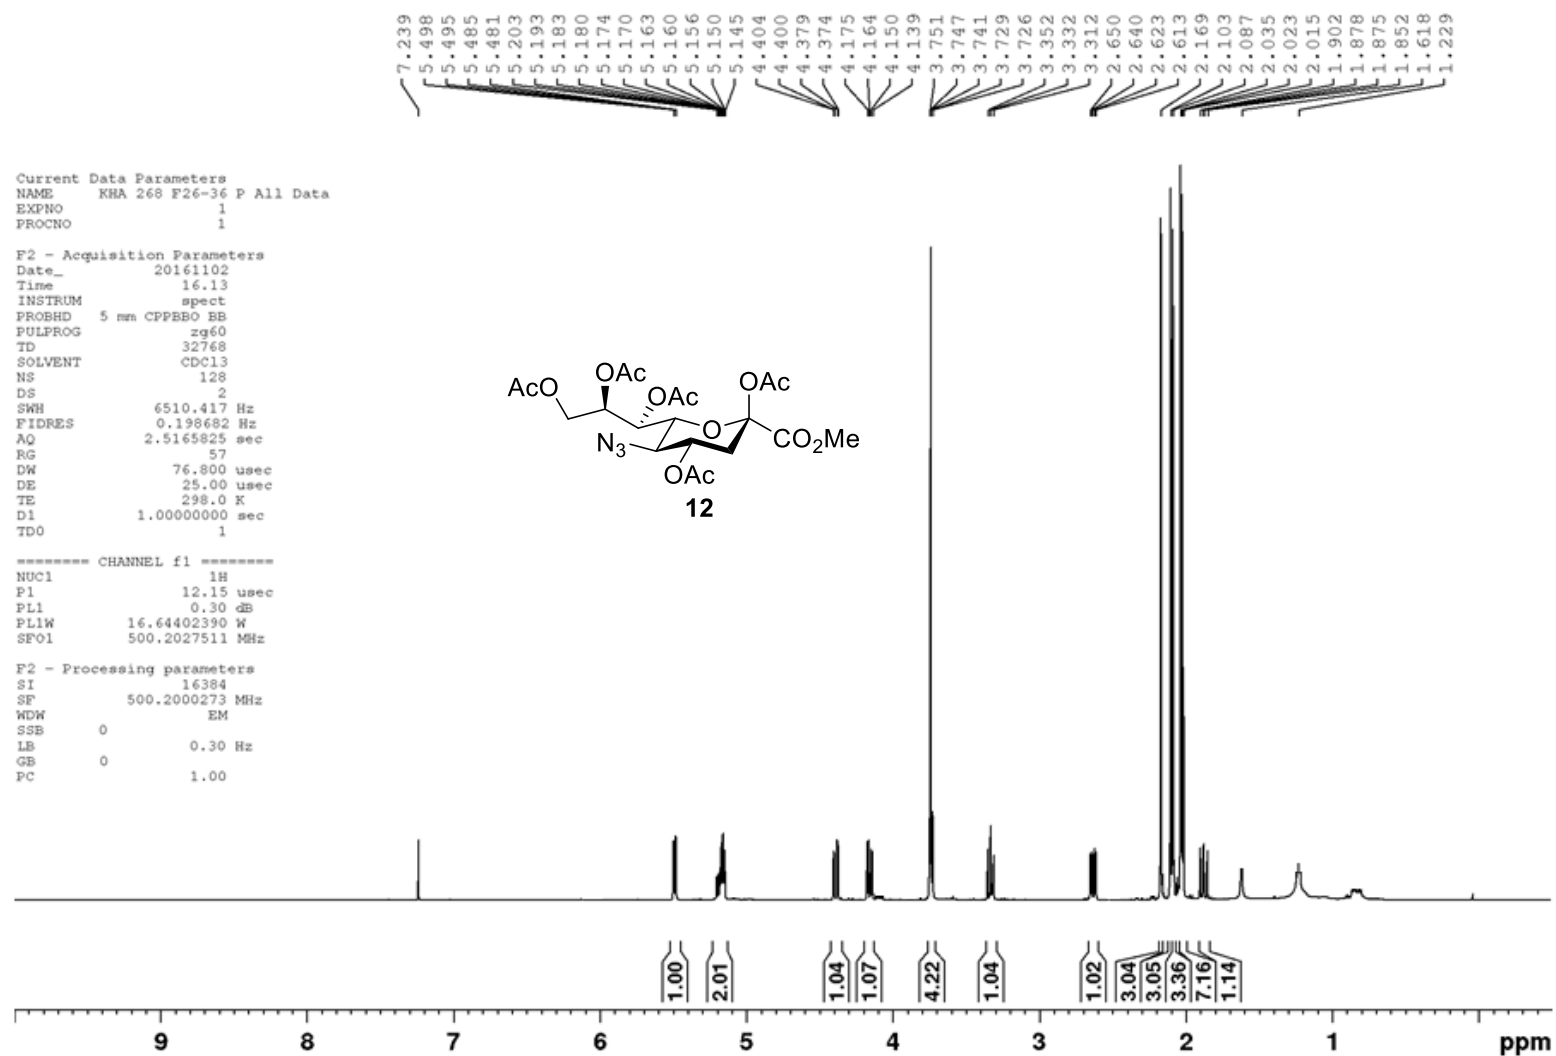

The <sup>1</sup>H NMR spectrum of compound 12.



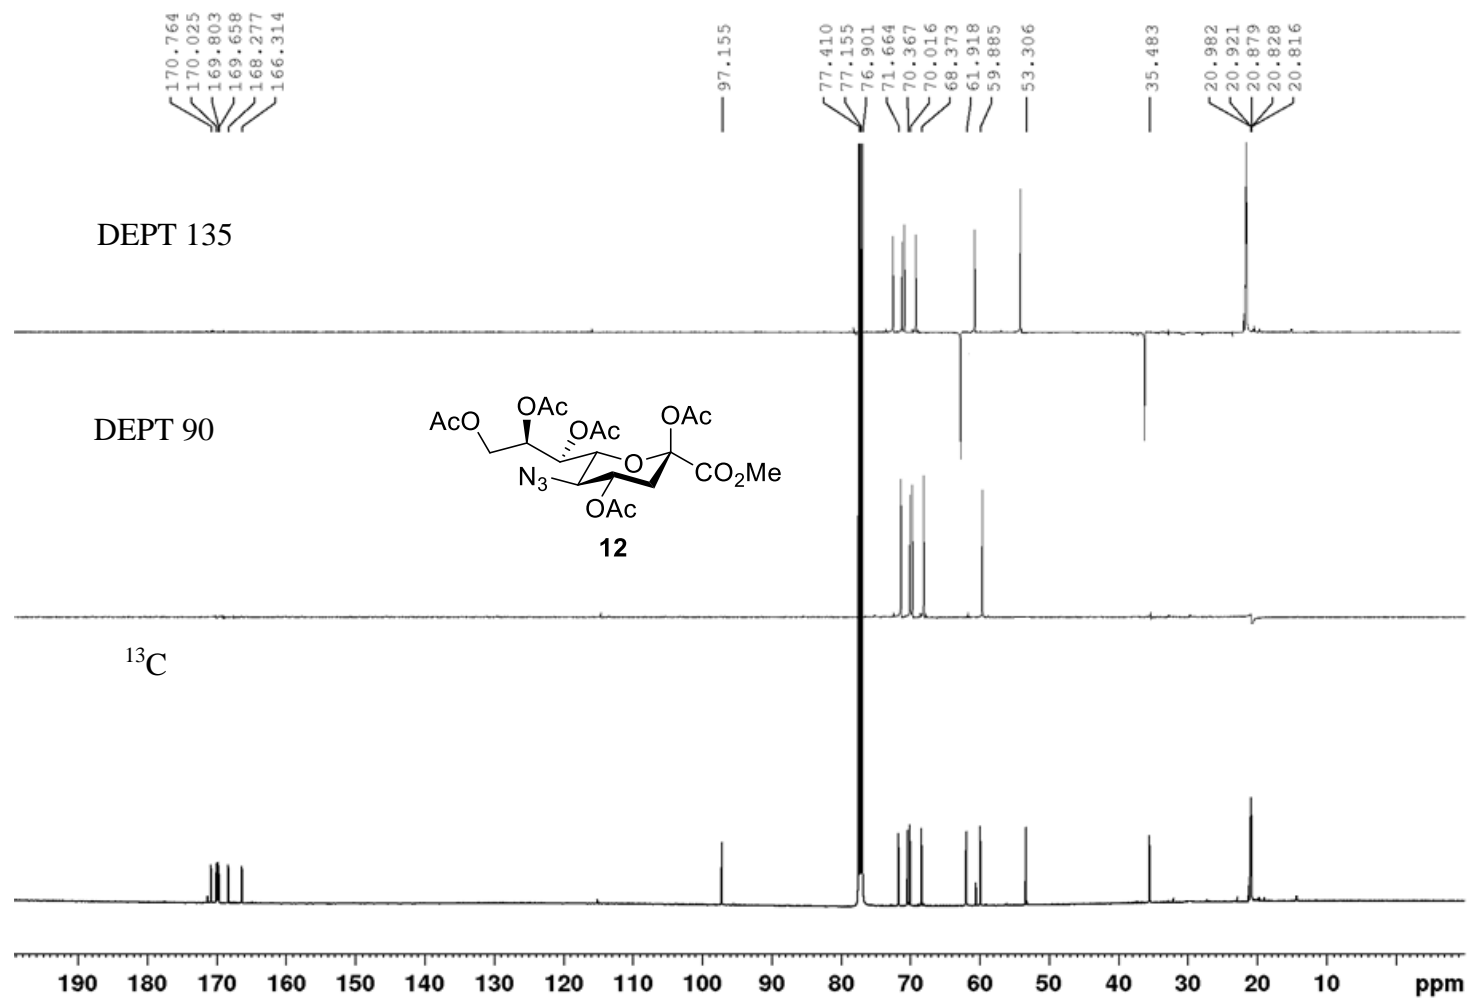

The  $^{13}\text{C}$  NMR spectrum of compound **12**.

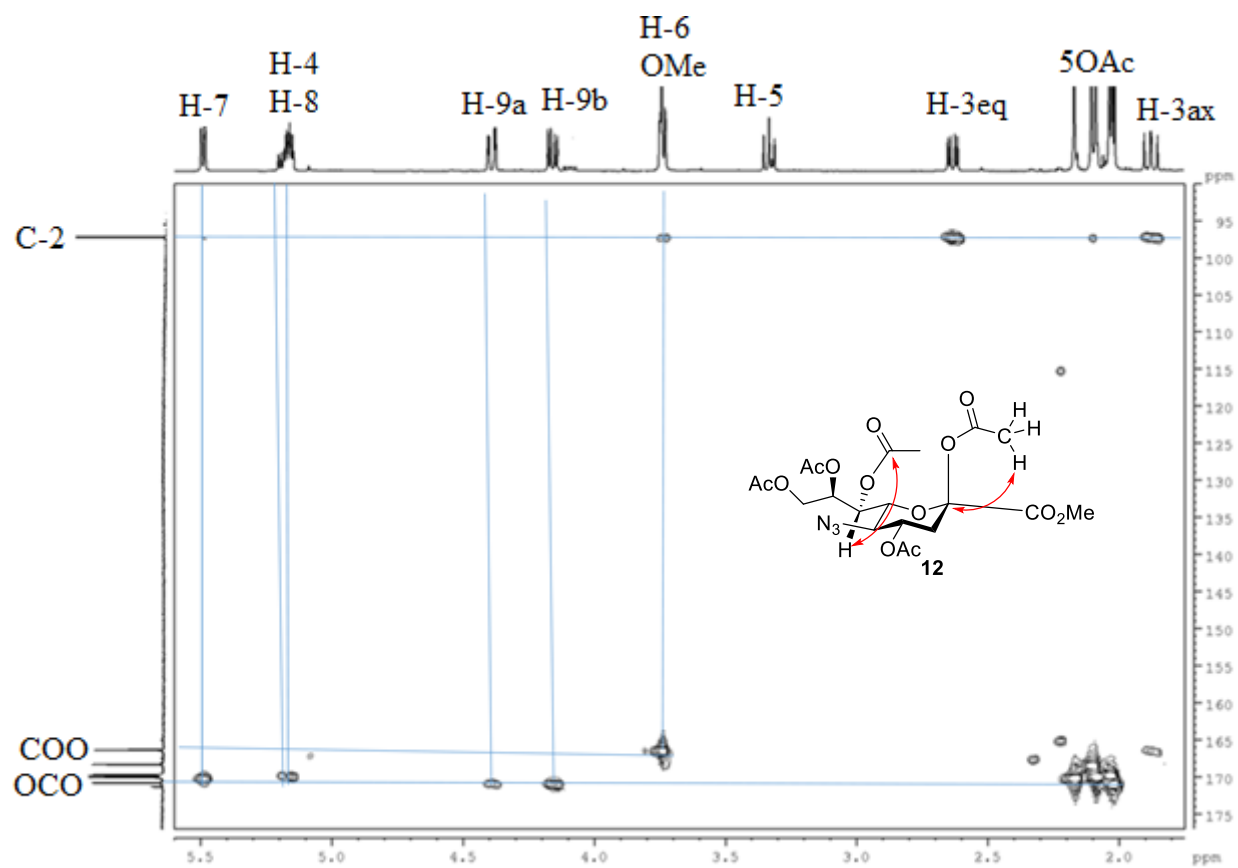

The HMBC NMR spectrum of compound 12.

# Elemental Composition Report

Page 1

## Single Mass Analysis

Tolerance = 100.0 PPM / DBE: min = -1000.0, max = 1000.0

Element prediction: Off

Number of isotope peaks used for i-FIT = 2

Monoisotopic Mass, Even Electron Ions

23 formula(e) evaluated with 1 results within limits (all results (up to 1000) for each mass)

Elements Used:

C: 0-1000 H: 0-1000 N: 3-3 O: 13-13 Na: 1-1

KHA 268 F26-36 5OAc N3

1108\_KHA 268 F26-36 5OAc N3 39 (3.135) Cm (39:41)

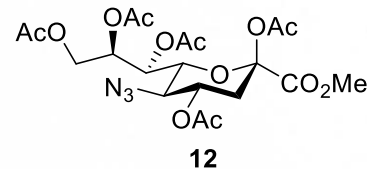

12

08-Nov-2016  
16:02:21  
1: TOF MS ES+  
7.07e+004

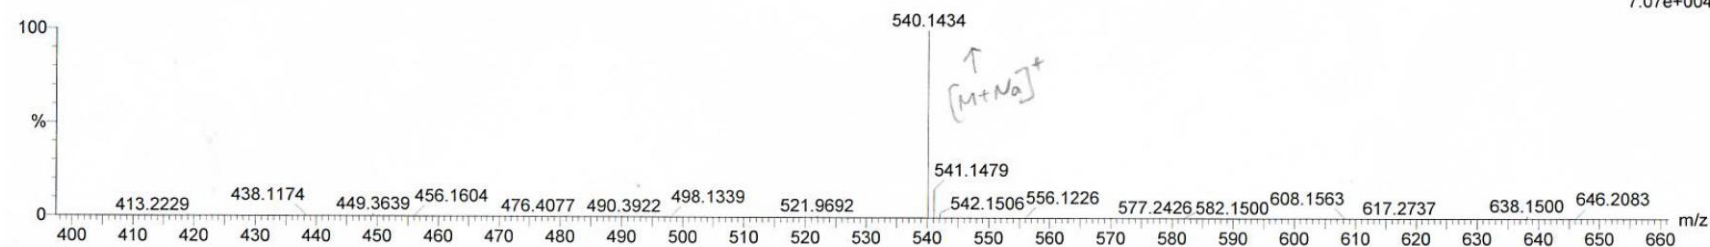

Minimum: -1000.0  
Maximum: 5.0 100.0 1000.0

| Mass     | Calc. Mass | mDa  | PPM  | DBE | i-FIT | i-FIT (Norm) | Formula                                                           |
|----------|------------|------|------|-----|-------|--------------|-------------------------------------------------------------------|
| 540.1434 | 540.1442   | -0.8 | -1.5 | 8.5 | 27.4  | 0.0          | C <sub>20</sub> H <sub>27</sub> N <sub>3</sub> O <sub>13</sub> Na |

The HRMS spectrum of compound 12.

Current Data Parameters  
 NAME KHA 269B F19-24 30Me N3 All Data  
 EXPNO 1  
 PROCNO 1

F2 - Acquisition Parameters  
 Date\_ 20161104  
 Time 18.27  
 INSTRUM spect  
 PROBHD 5 mm CFPBBO BB  
 PULPROG zg60  
 TD 32768  
 SOLVENT CDCl3  
 NS 128  
 DS 2  
 SWH 6510.417 Hz  
 FIDRES 0.198682 Hz  
 AQ 2.5165825 sec  
 RG 57  
 DM 76.800 usec  
 DE 25.00 usec  
 TE 298.0 K  
 D1 1.00000000 sec  
 TDO 1

\*\*\*\*\* CHANNEL f1 \*\*\*\*\*  
 NUC1 1H  
 P1 12.15 usec  
 PL1 0.30 dB  
 PL1W 16.64402390 W  
 SFO1 500.2027511 MHz

F2 - Processing parameters  
 SI 16384  
 SF 500.2000273 MHz  
 WDW EM  
 SSB 0  
 LB 0.30 Hz  
 GB 0  
 PC 1.00

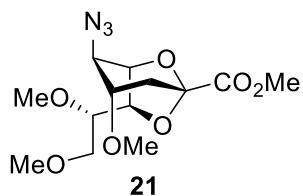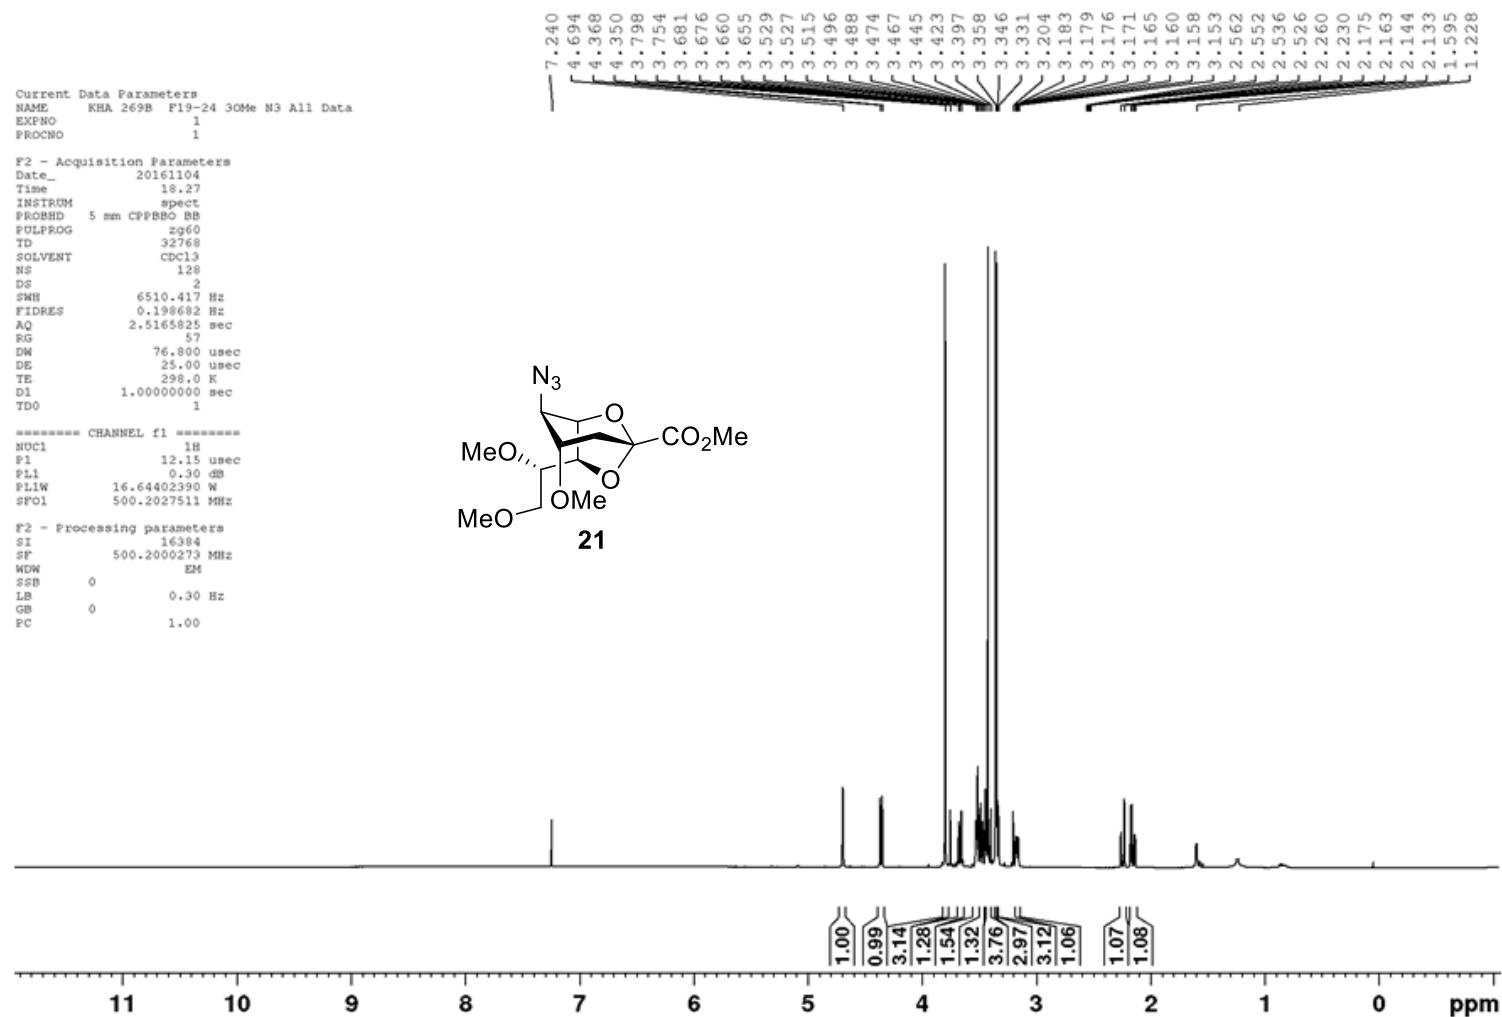

The <sup>1</sup>H NMR spectrum of compound **21**.

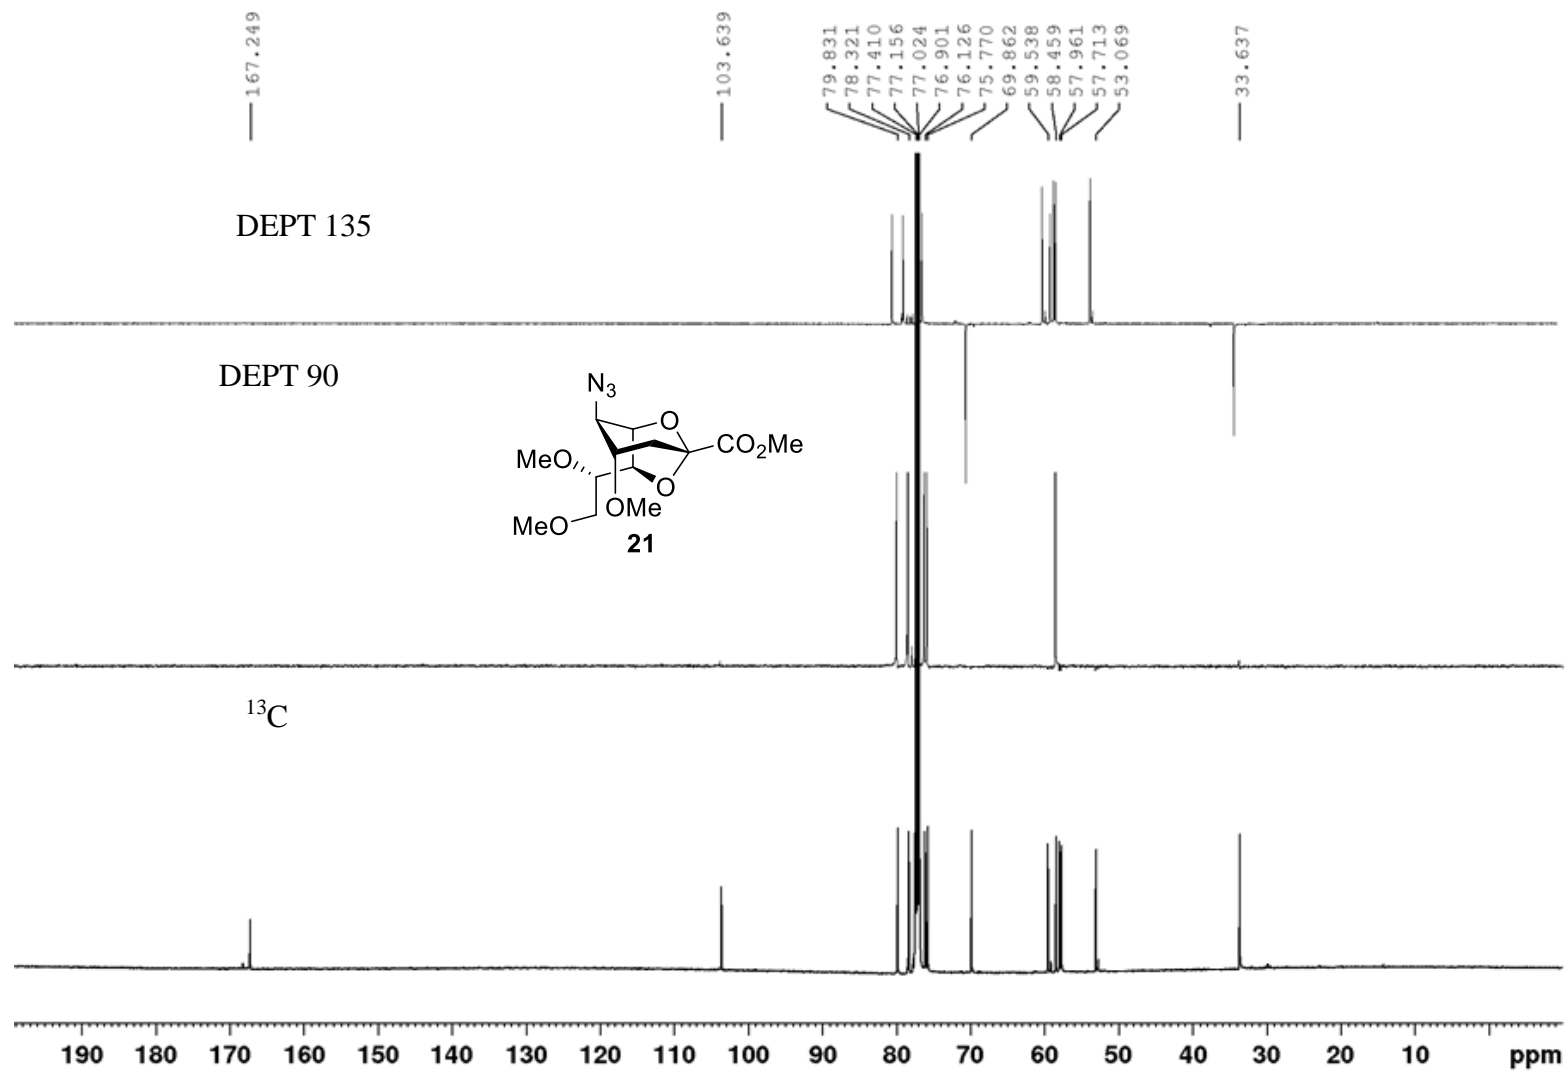

The <sup>13</sup>C NMR spectrum of compound **21**.

## Elemental Composition Report

Page 1

### Single Mass Analysis

Tolerance = 50.0 PPM / DBE: min = -1000.0, max = 1000.0

Element prediction: Off

Number of isotope peaks used for i-FIT = 2

Monoisotopic Mass, Even Electron Ions

15 formula(e) evaluated with 1 results within limits (all results (up to 1000) for each mass)

Elements Used:

C: 0-1000 H: 0-1000 N: 3-3 O: 7-7 Na: 1-1

KHA 269B F19-243OMe N3

1108\_KHA 269B F19-243OMe N3 42 (3.395) Cm (42-5)

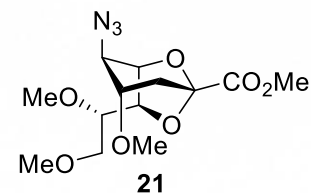

08-Nov-2016

16:57:10

1: TOF MS ES+

1.31e+004

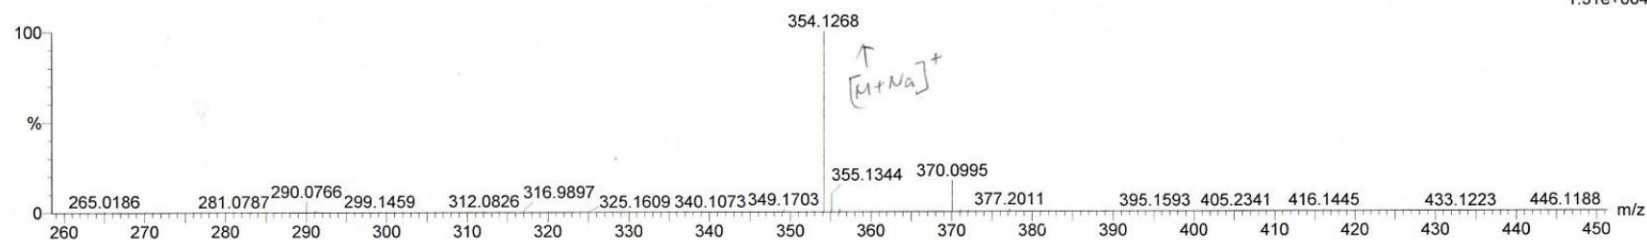

Minimum: -1000.0  
Maximum: 5.0 50.0 1000.0

| Mass     | Calc. Mass | mDa  | PPM  | DBE | i-FIT | i-FIT (Norm) | Formula                                                          |
|----------|------------|------|------|-----|-------|--------------|------------------------------------------------------------------|
| 354.1268 | 354.1277   | -0.9 | -2.5 | 4.5 | 19.2  | 0.0          | C <sub>13</sub> H <sub>21</sub> N <sub>3</sub> O <sub>7</sub> Na |

The HRMS spectrum of compound 21.

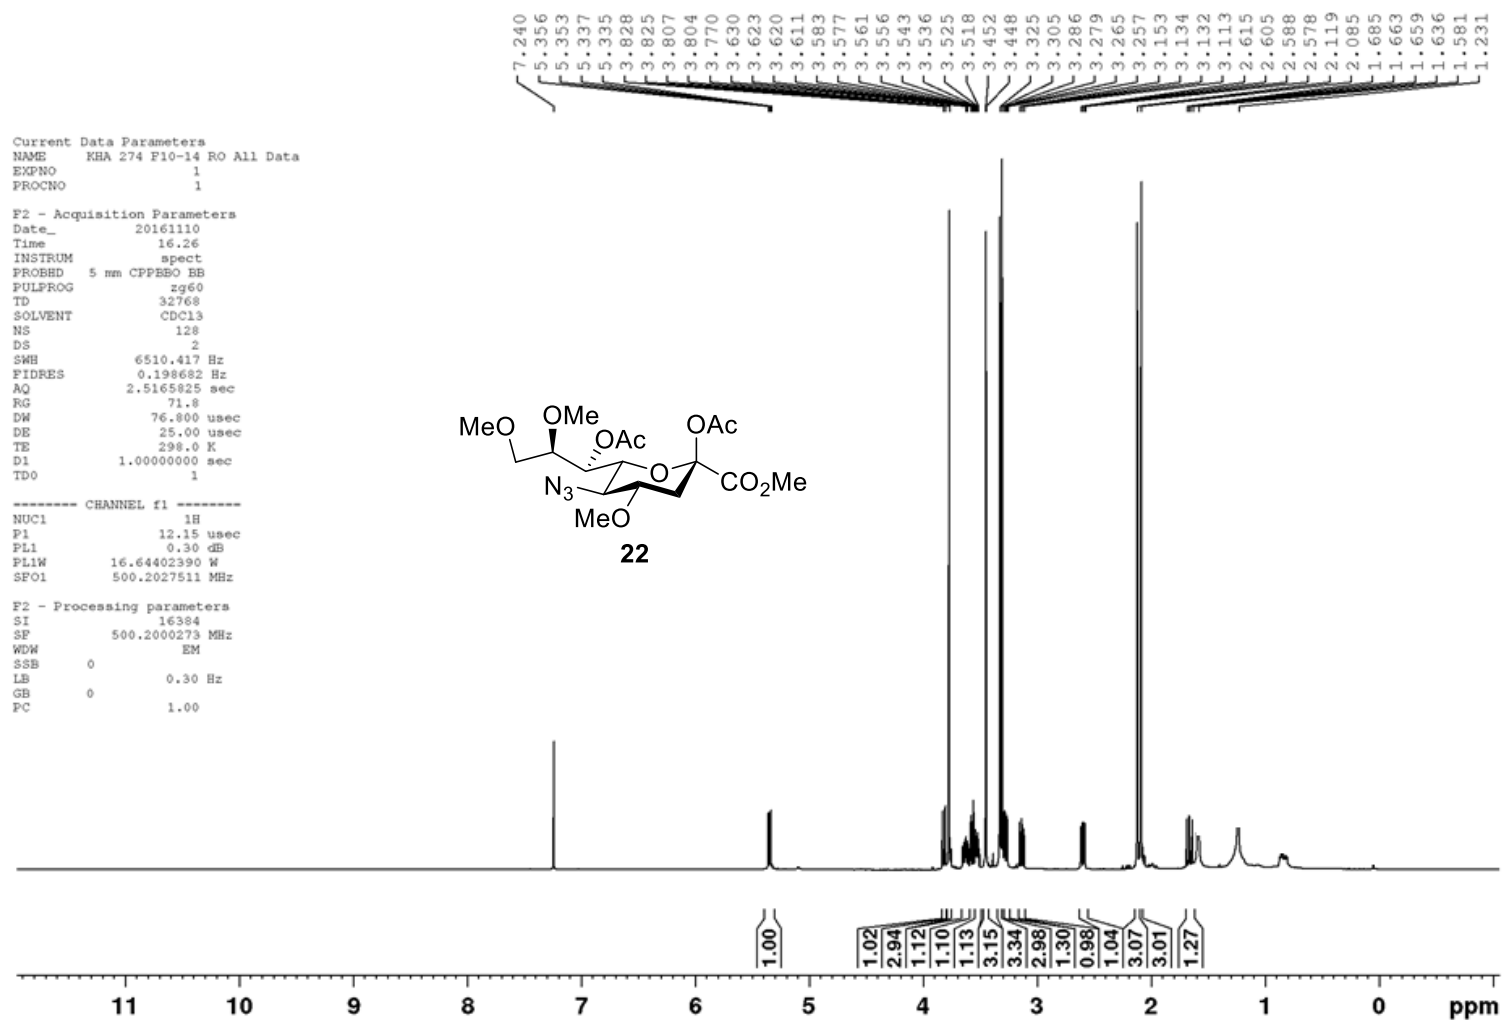

The <sup>1</sup>H NMR spectrum of compound **22**.

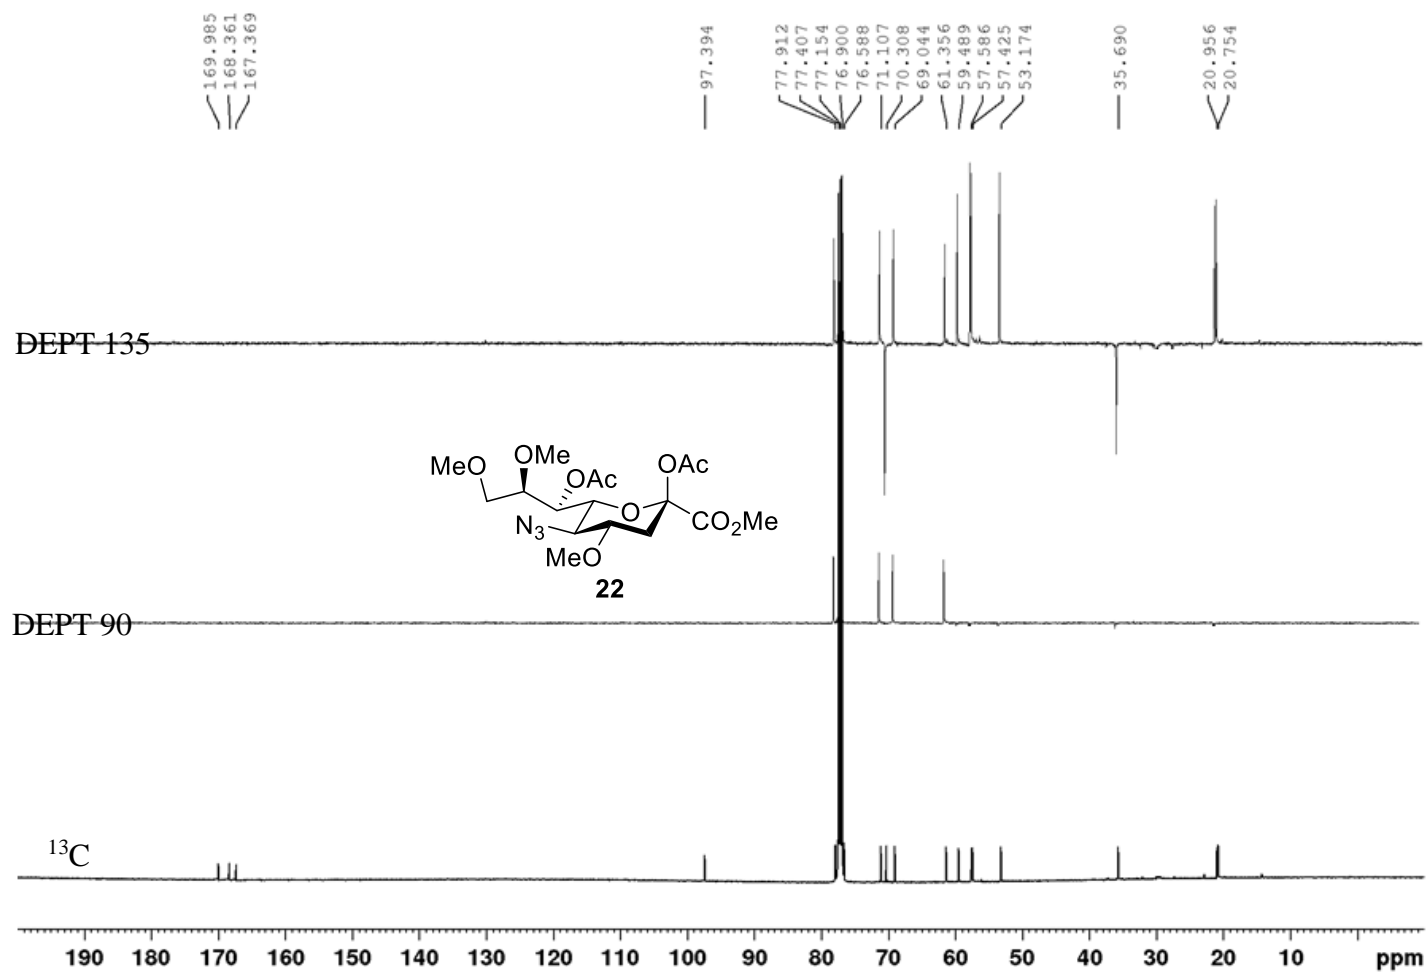

The <sup>13</sup>C NMR spectrum of compound **22**.



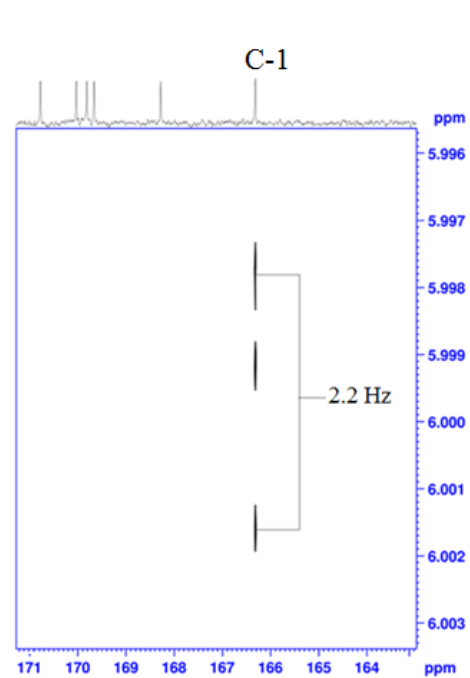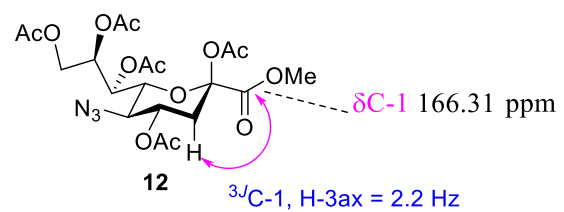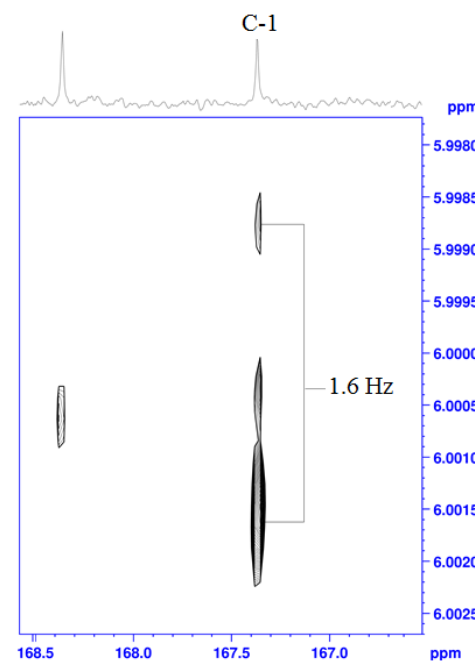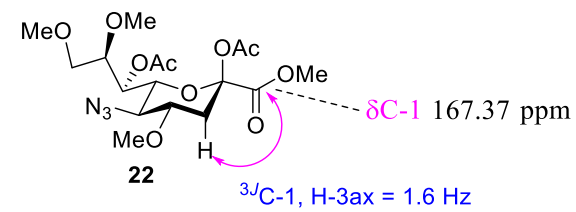

The 2D Selective Heteronuclear  $J$ -Resolved Spectrum of compounds **12** and **22**.

# Elemental Composition Report

Page 1

## Single Mass Analysis

Tolerance = 20.0 PPM / DBE: min = -1000.0, max = 1000.0

Element prediction: Off

Number of isotope peaks used for i-FIT = 2

Monoisotopic Mass, Even Electron Ions

20 formula(e) evaluated with 1 results within limits (all results (up to 1000) for each mass)

Elements Used:

C: 0-1000 H: 0-1000 N: 3-3 O: 10-10 Na: 1-1

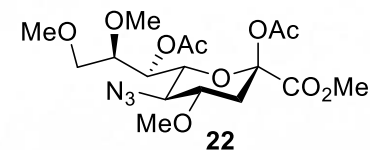

KHA 274 F10-14RO

KE267

17-Nov-2016

1117\_KHA 274 F10-14RO 56 (4.495) Cm (56-1x20.000)

17:33:59

1: TOF MS ES+

2.05e+004

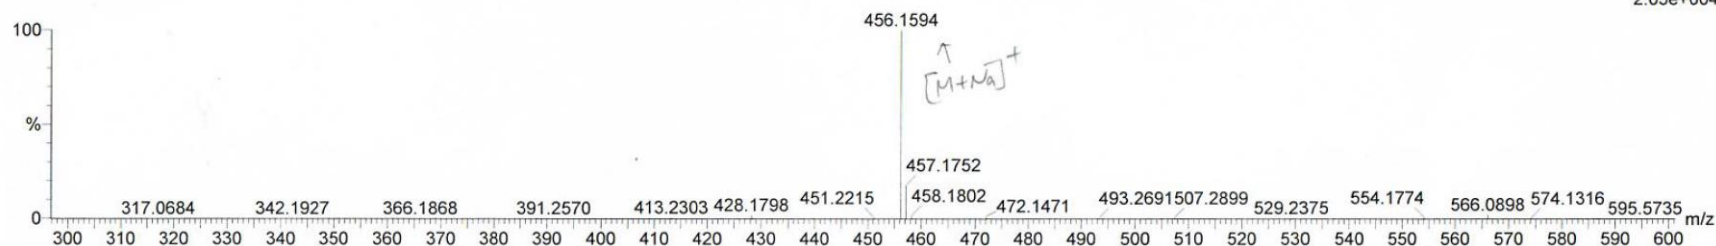

Minimum: -1000.0  
Maximum: 5.0 20.0 1000.0

| Mass     | Calc. Mass | mDa | PPM | DBE | i-FIT | i-FIT (Norm) | Formula           |
|----------|------------|-----|-----|-----|-------|--------------|-------------------|
| 456.1594 | 456.1594   | 0.0 | 0.0 | 5.5 | 24.5  | 0.0          | C17 H27 N3 O10 Na |

The HRMS spectrum of compound **22**.

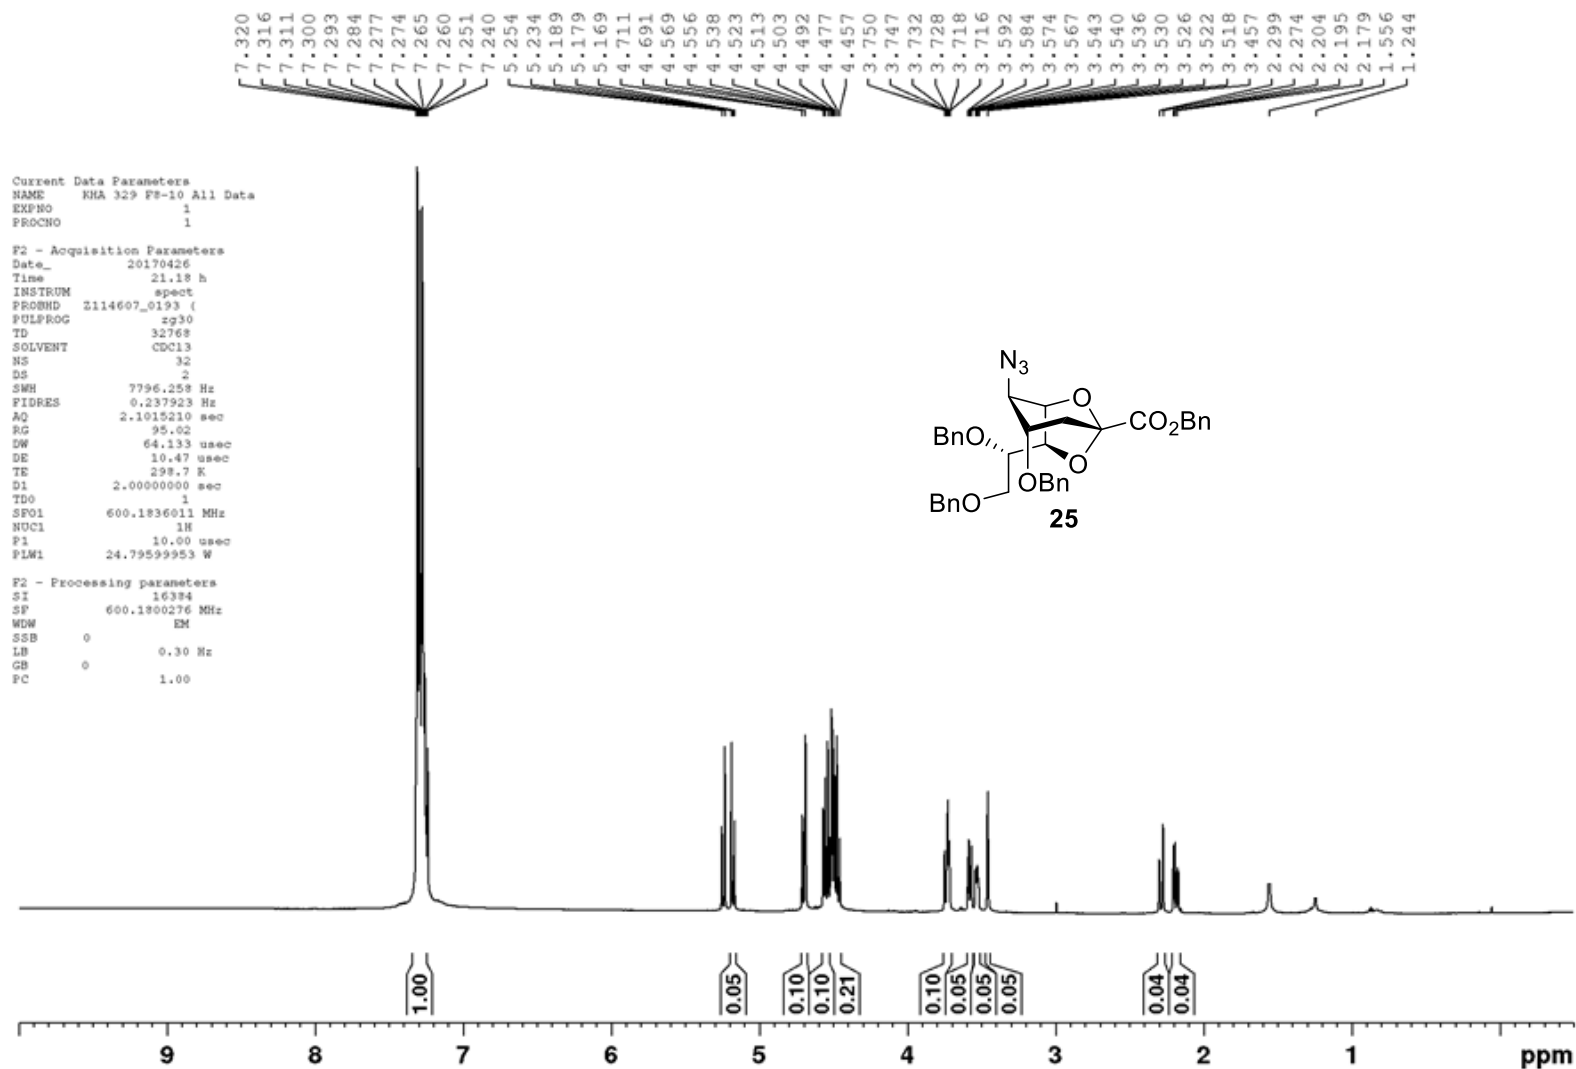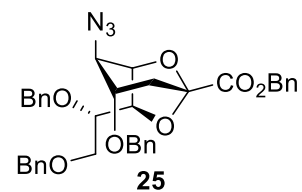

The  $^1\text{H}$  NMR of compound **25**.

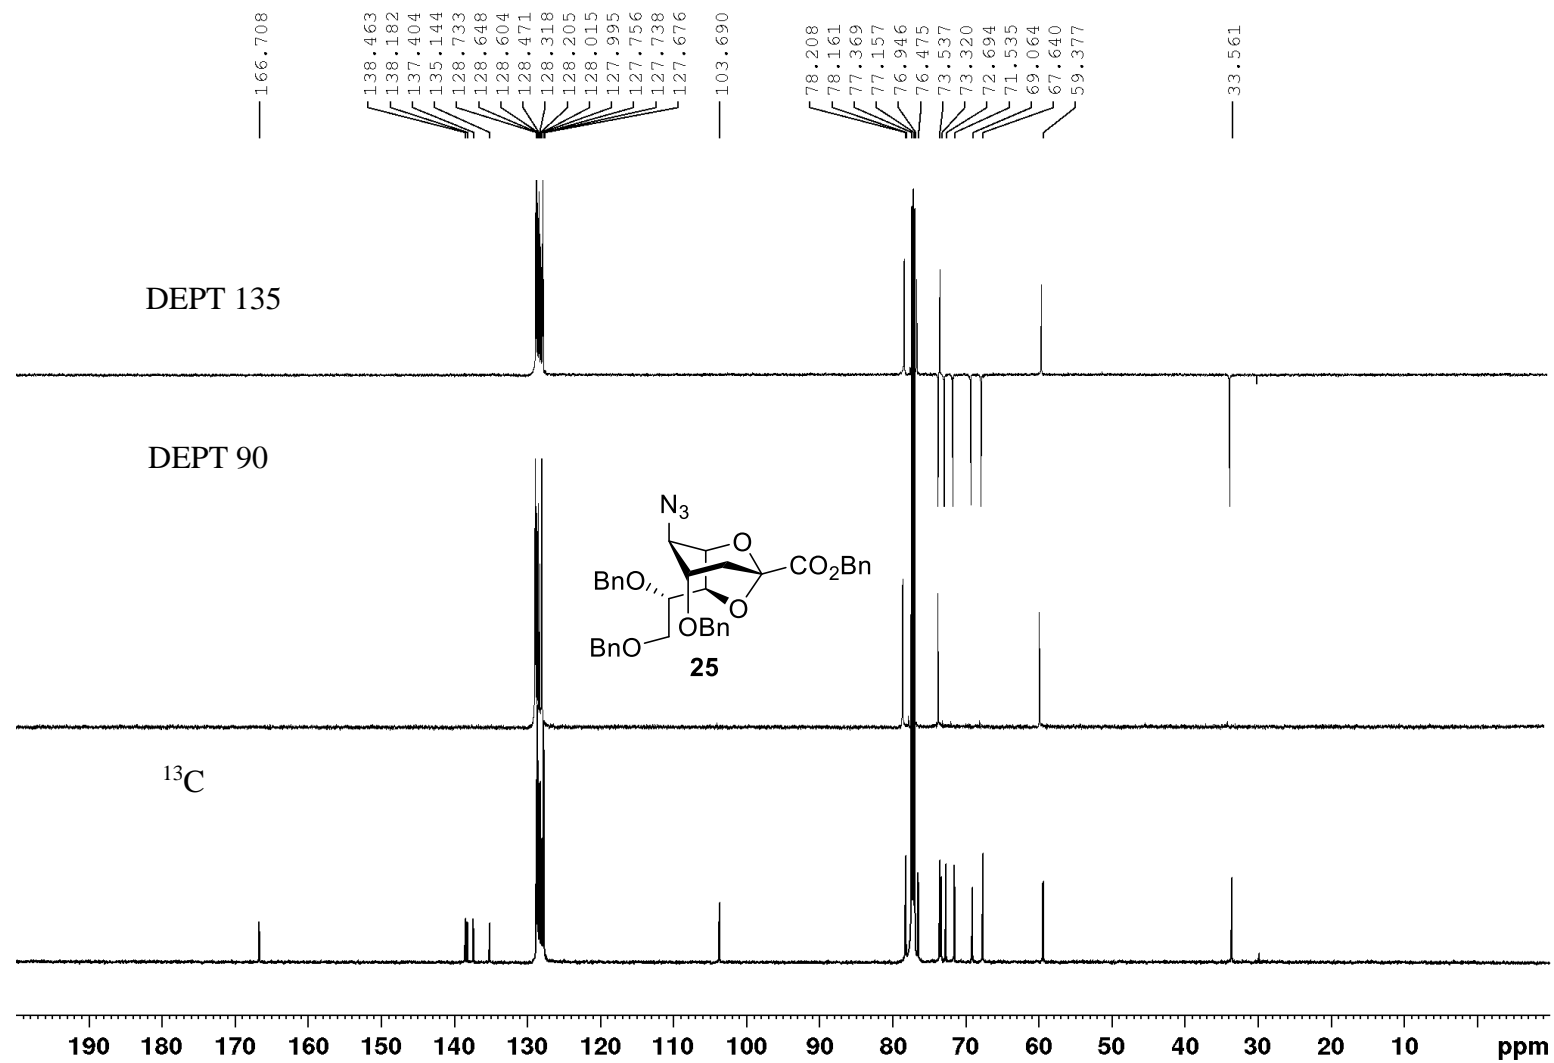

The <sup>13</sup>C NMR spectrum of compound **25**.

# Elemental Composition Report

Page 1

## Single Mass Analysis

Tolerance = 5.0 PPM / DBE: min = -1000.0, max = 1000.0

Element prediction: Off

Number of isotope peaks used for i-FIT = 2

Monoisotopic Mass, Even Electron Ions

41 formula(e) evaluated with 1 results within limits (all results (up to 1000) for each mass)

Elements Used:

C: 0-10000 H: 0-10000 N: 3-3 O: 7-7 Na: 1-1

KHA 329 F8-10 4OBnN3

0509\_KHA 329 F8-10 4OBnN3 147 (5.331) Cm (147-1x10.000)

KE267

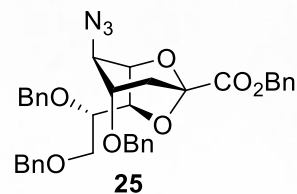

25

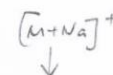

09-May-2017  
13:46:36  
1: TOF MS ES+  
1.10e+003

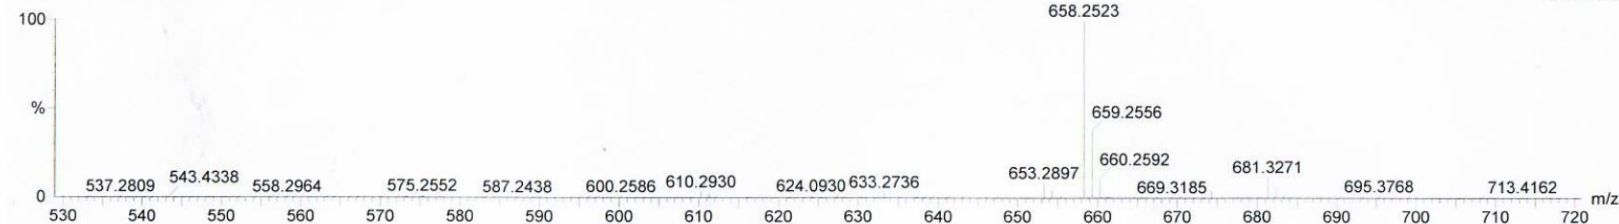

Minimum: -1000.0  
Maximum: 1000.0

| Mass     | Calc. Mass | mDa  | PPM  | DBE  | i-FIT | i-FIT (Norm) | Formula          |
|----------|------------|------|------|------|-------|--------------|------------------|
| 658.2523 | 658.2529   | -0.6 | -0.9 | 20.5 | 19.6  | 0.0          | C37 H37 N3 O7 Na |

The HRMS spectrum of compound 25.

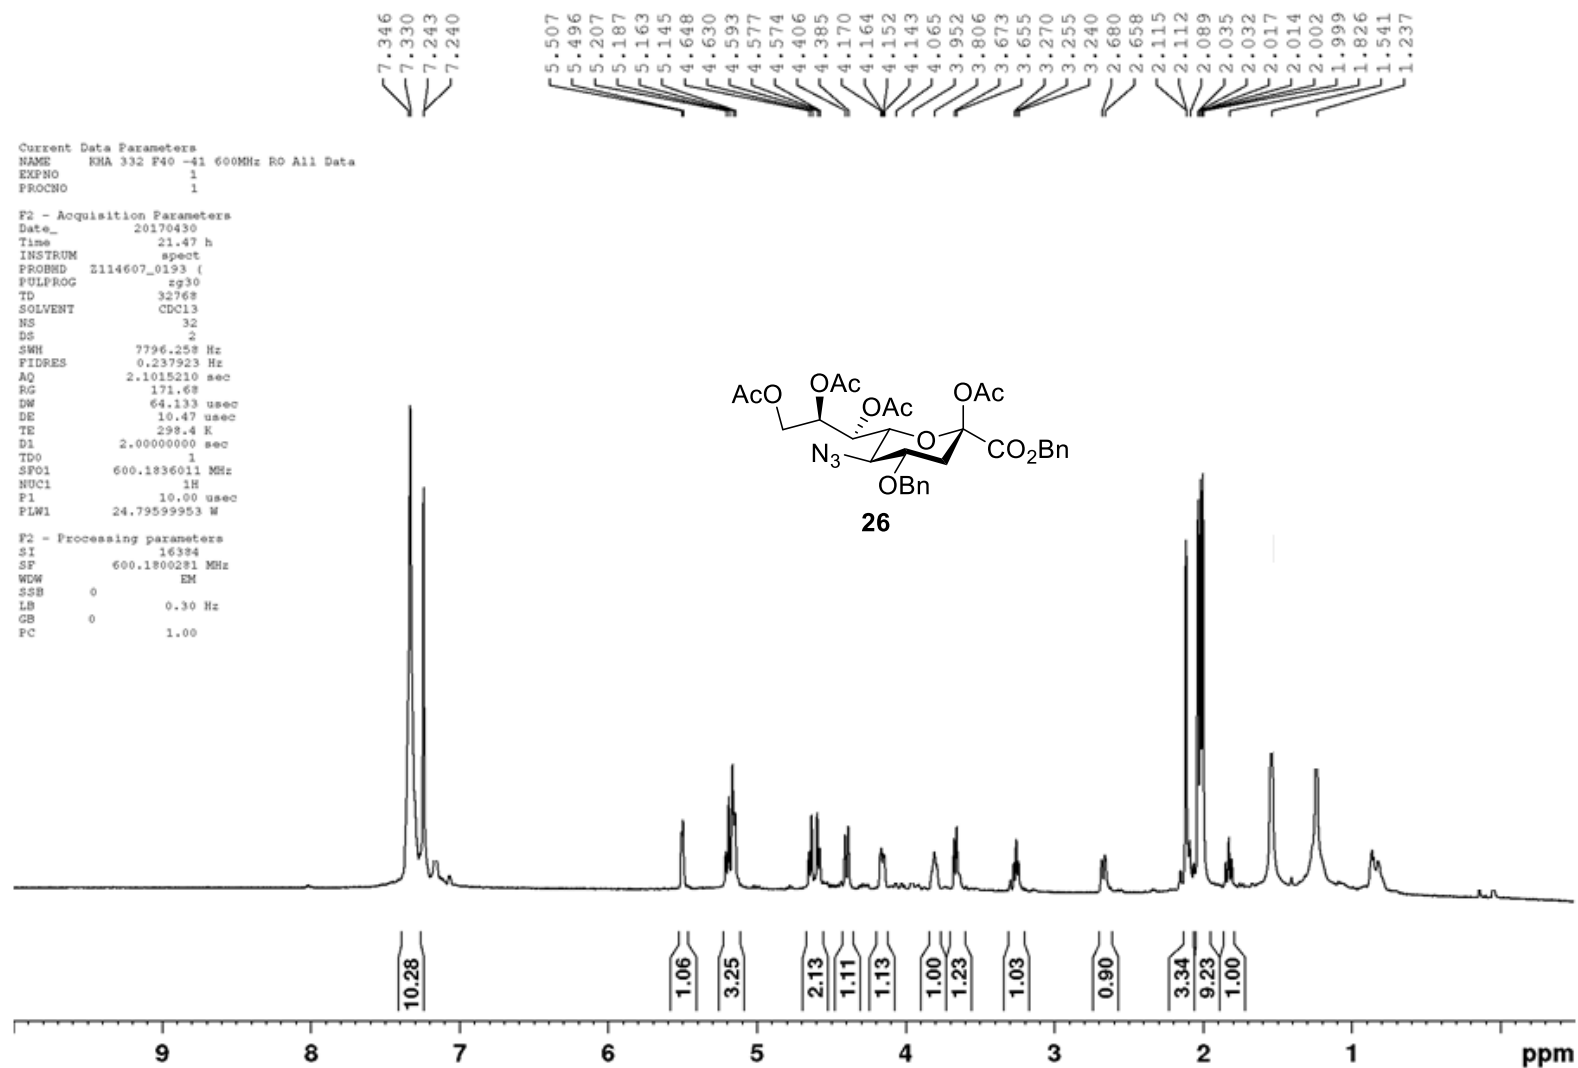

The <sup>1</sup>H NMR spectrum of compound **26**.

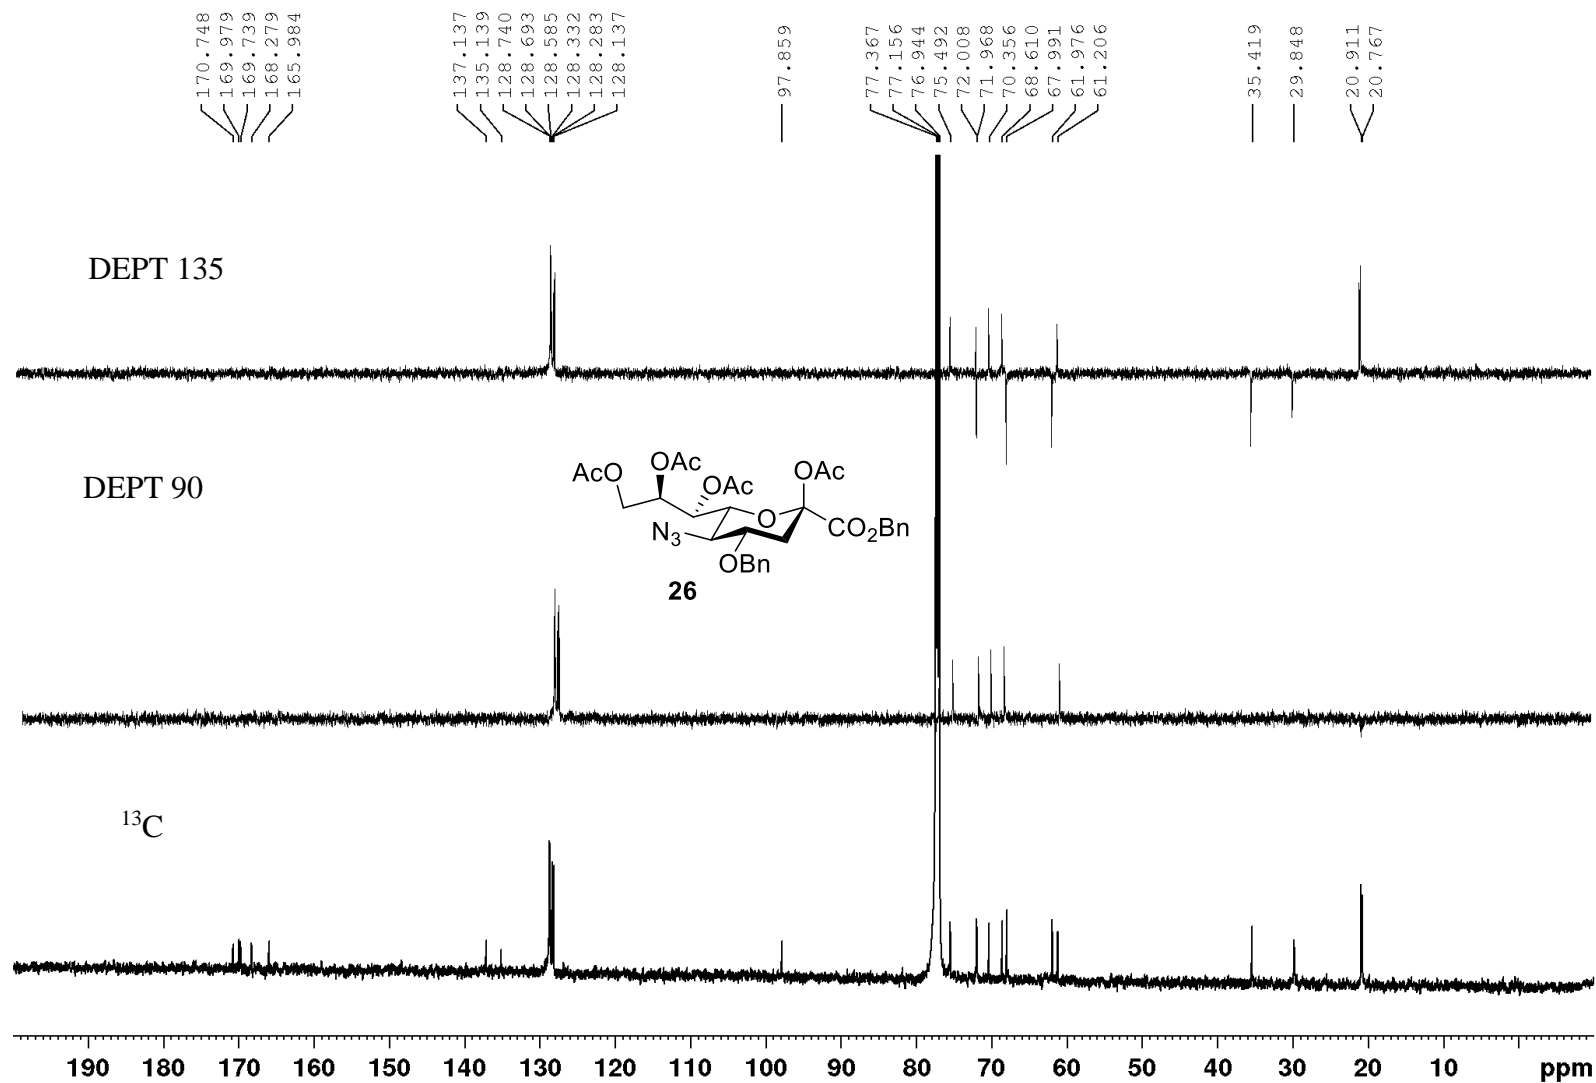

The  $^{13}\text{C}$  NMR spectrum of compound **26**.

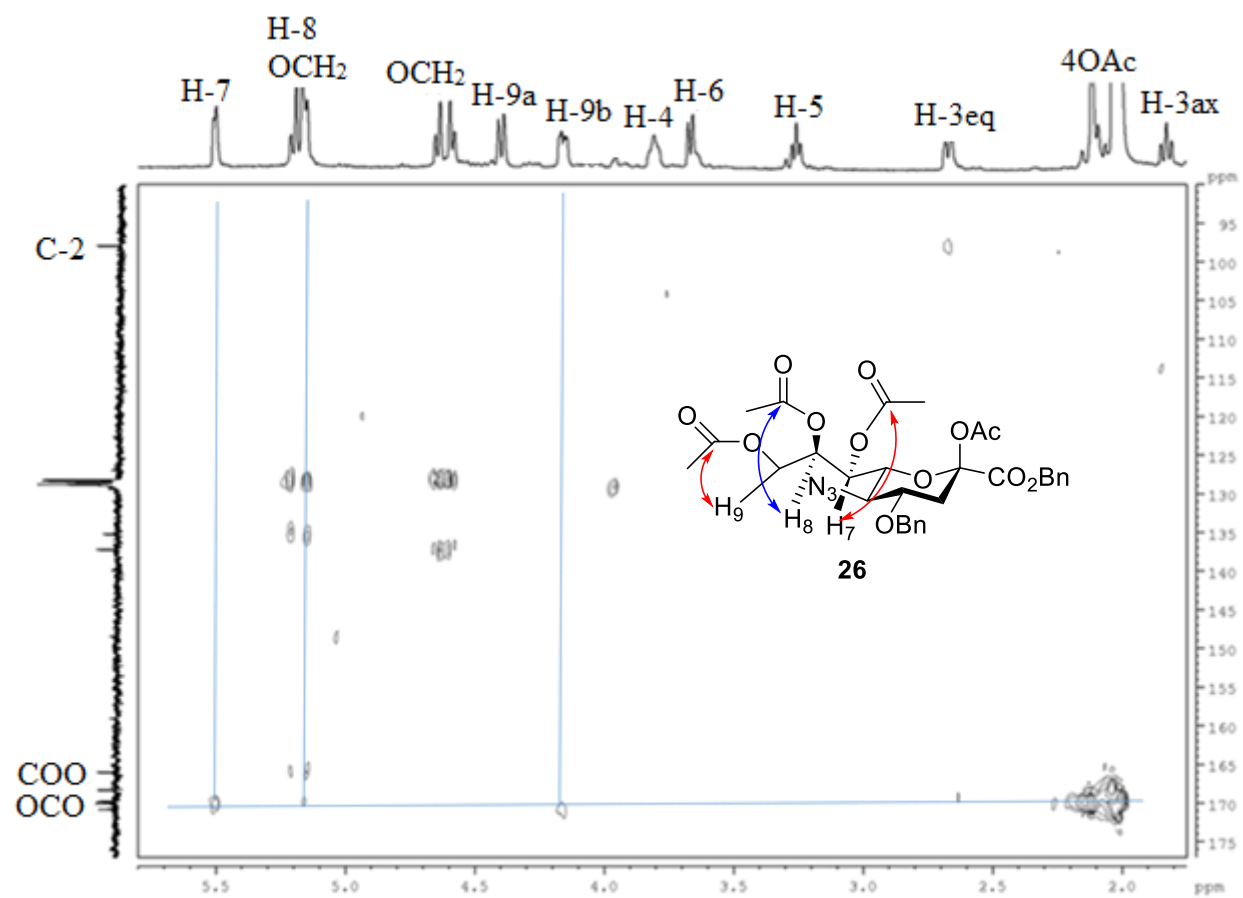

The HMBC NMR spectrum of compound **26**.



# Elemental Composition Report

Page 1

## Single Mass Analysis

Tolerance = 20.0 PPM / DBE: min = -1000.0, max = 1000.0

Element prediction: Off

Number of isotope peaks used for i-FIT = 2

Monoisotopic Mass, Even Electron Ions

35 formula(e) evaluated with 1 results within limits (all results (up to 1000) for each mass)

Elements Used:

C: 0-1000 H: 0-1000 N: 3-3 O: 12-12 Na: 1-1

KHA 332 F40-41 4OBn2OAcN3

0629\_KHA 332 F40-41 4OBn2OAcN3 46 (1.671) Cm (46-1x5.000)

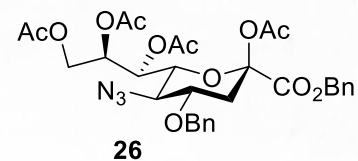

KE267

29-Jun-2017  
17:06:36  
1: TOF MS ES+  
6.95e+004

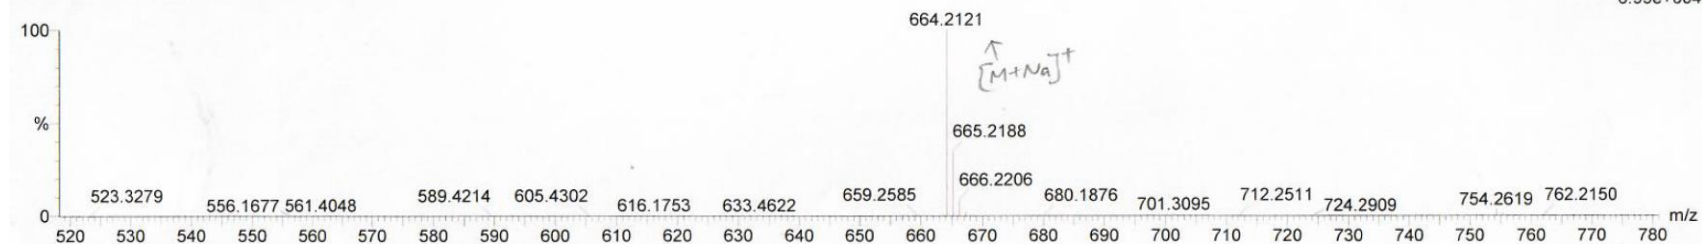

Minimum: -1000.0  
Maximum: 5.0 20.0 1000.0

| Mass     | Calc. Mass | mDa | PPM | DBE  | i-FIT | i-FIT (Norm) | Formula           |
|----------|------------|-----|-----|------|-------|--------------|-------------------|
| 664.2121 | 664.2118   | 0.3 | 0.5 | 15.5 | 34.3  | 0.0          | C31 H35 N3 O12 Na |

The HRMS spectrum of compound **26**.

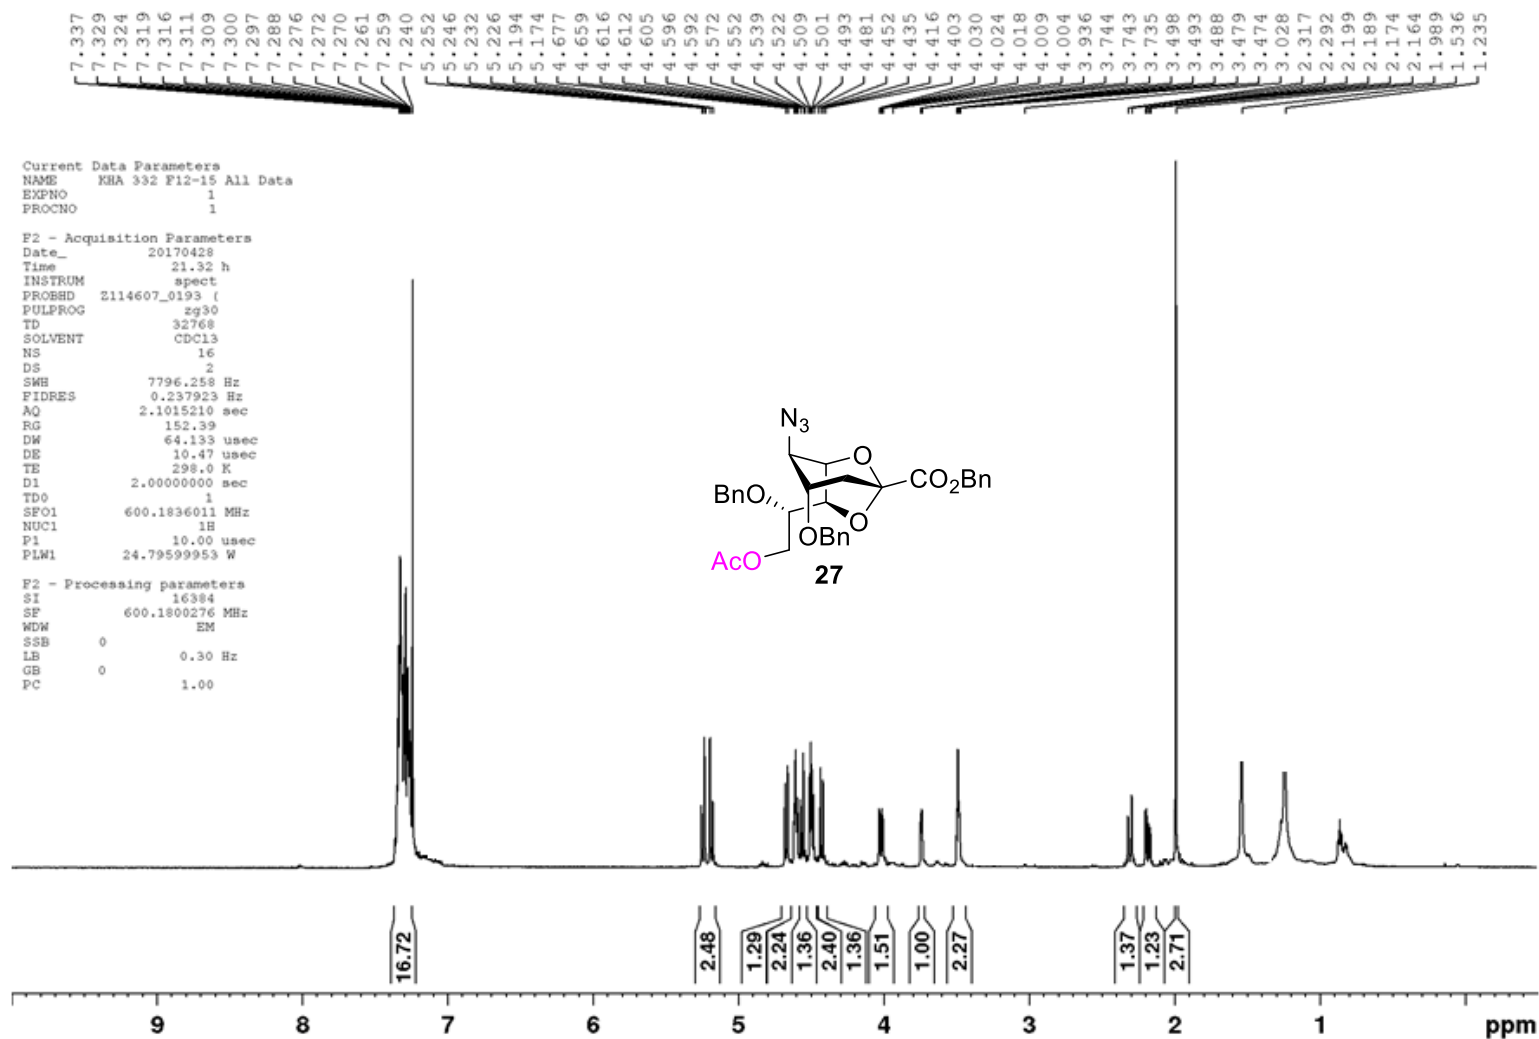

The <sup>1</sup>H NMR spectrum of compound 27.

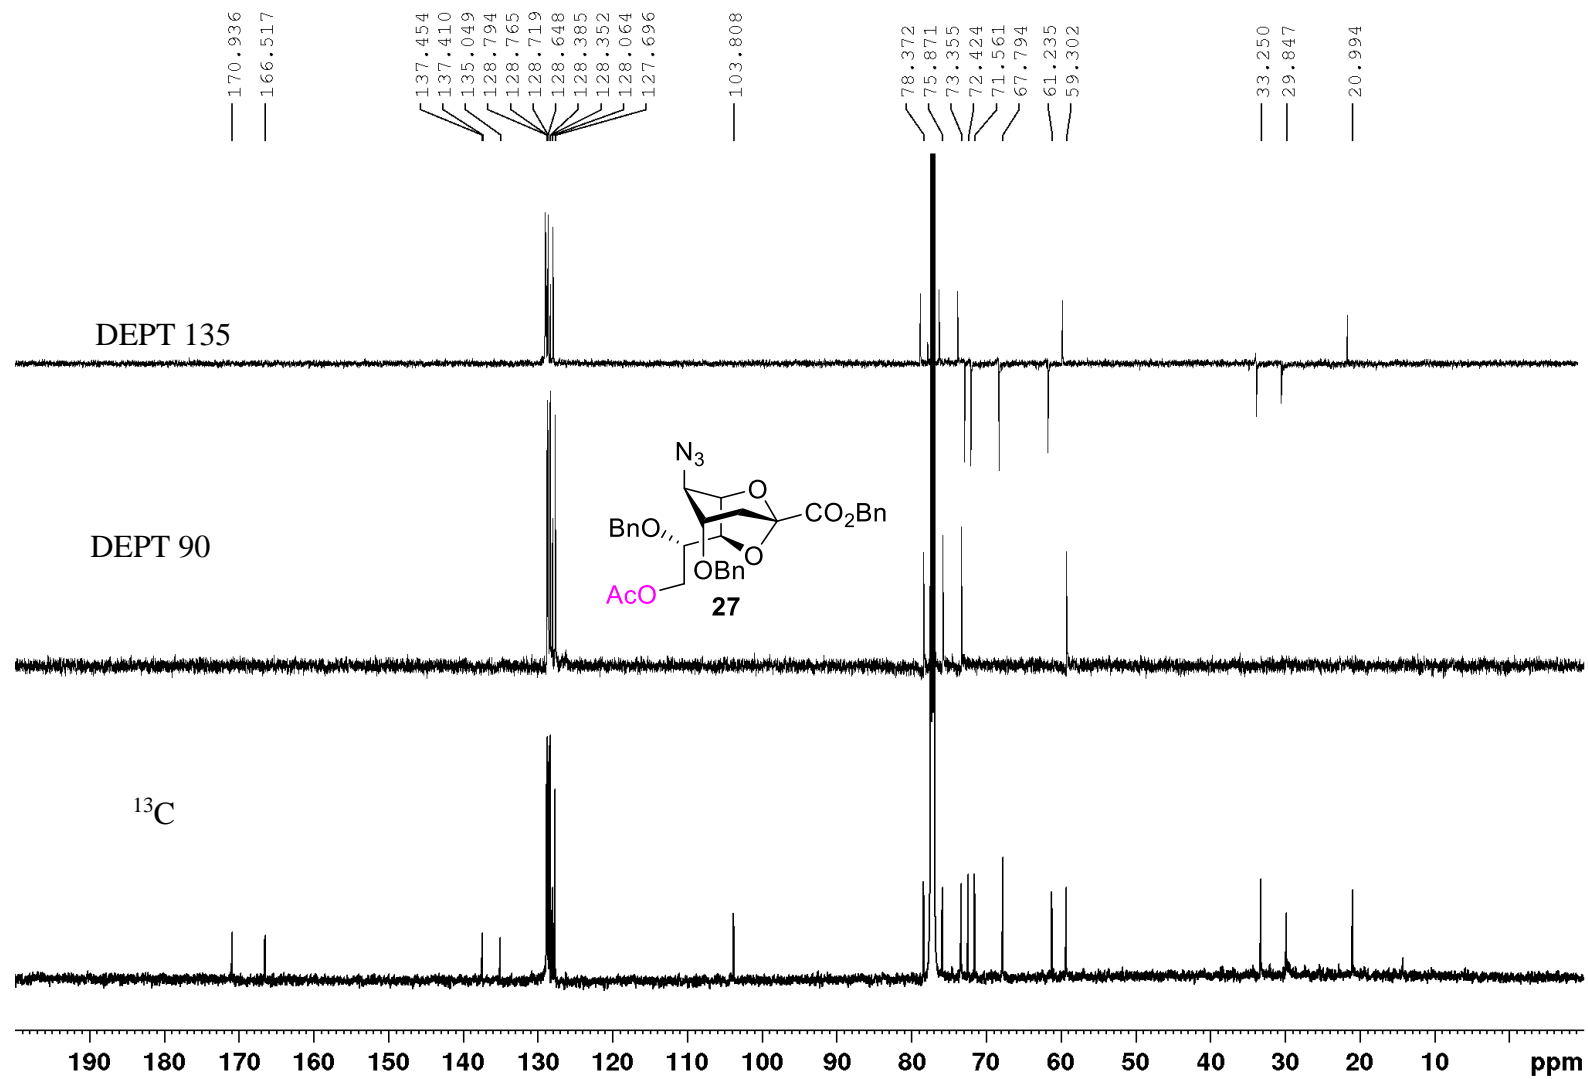

The  $^{13}\text{C}$  NMR spectrum of compound **27**.

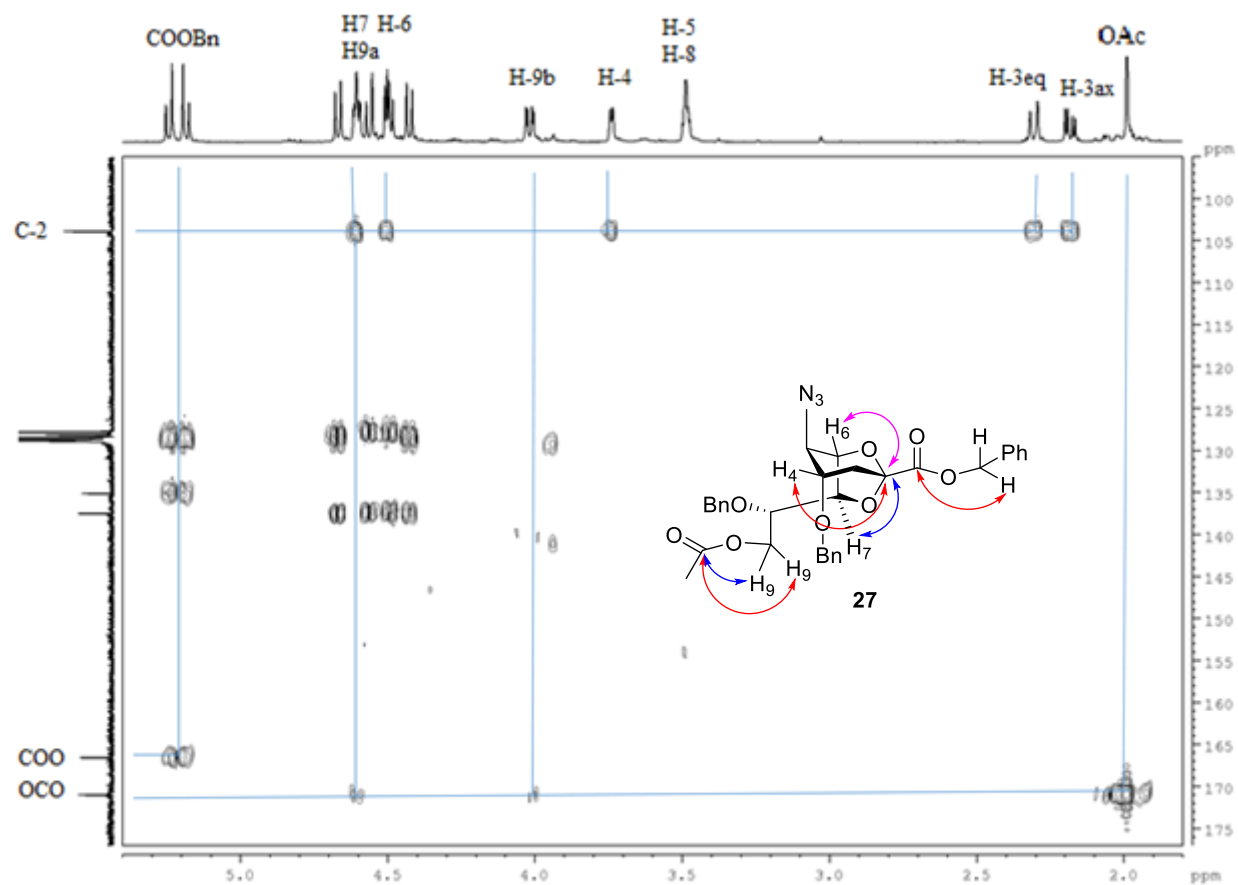

The HMBC NMR spectrum of compound **27**.

# Elemental Composition Report

Page 1

## Single Mass Analysis

Tolerance = 50.0 PPM / DBE: min = -1000.0, max = 1000.0

Element prediction: Off

Number of isotope peaks used for i-FIT = 2

Monoisotopic Mass, Even Electron Ions

35 formula(e) evaluated with 1 results within limits (all results (up to 1000) for each mass)

Elements Used:

C: 0-10000 H: 0-10000 N: 3-3 O: 8-8 Na: 1-1

KHA 332 F12-15 3OBn1OAcN3

0509\_KHA 332 F12-15 3OBn1OAcN3 44 (1.582) Cm (44-1x10.000)

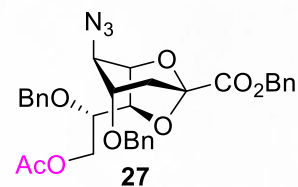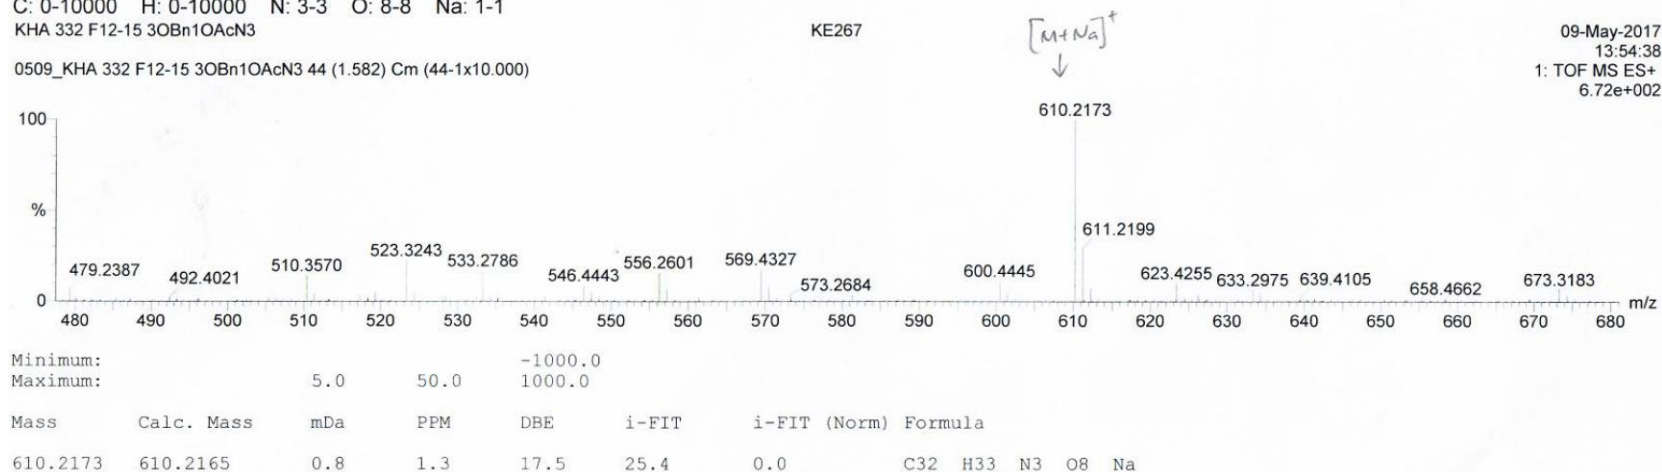

The HRMS spectrum of compound 27.

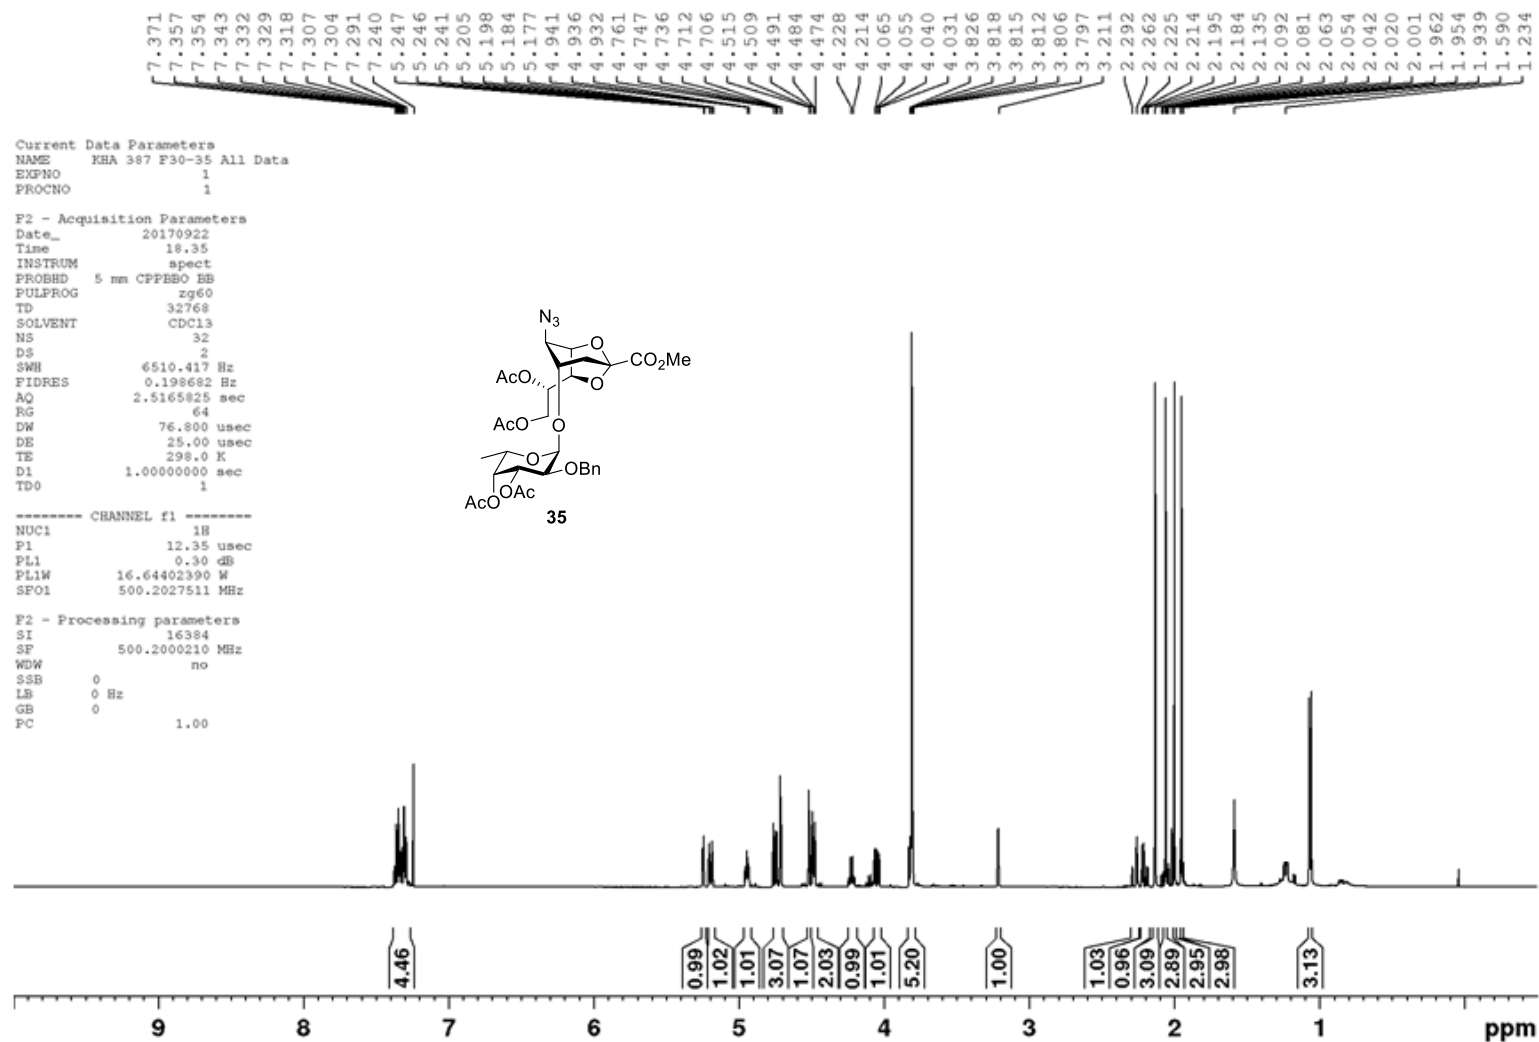

The  $^1\text{H}$  NMR spectrum of compound **35**.

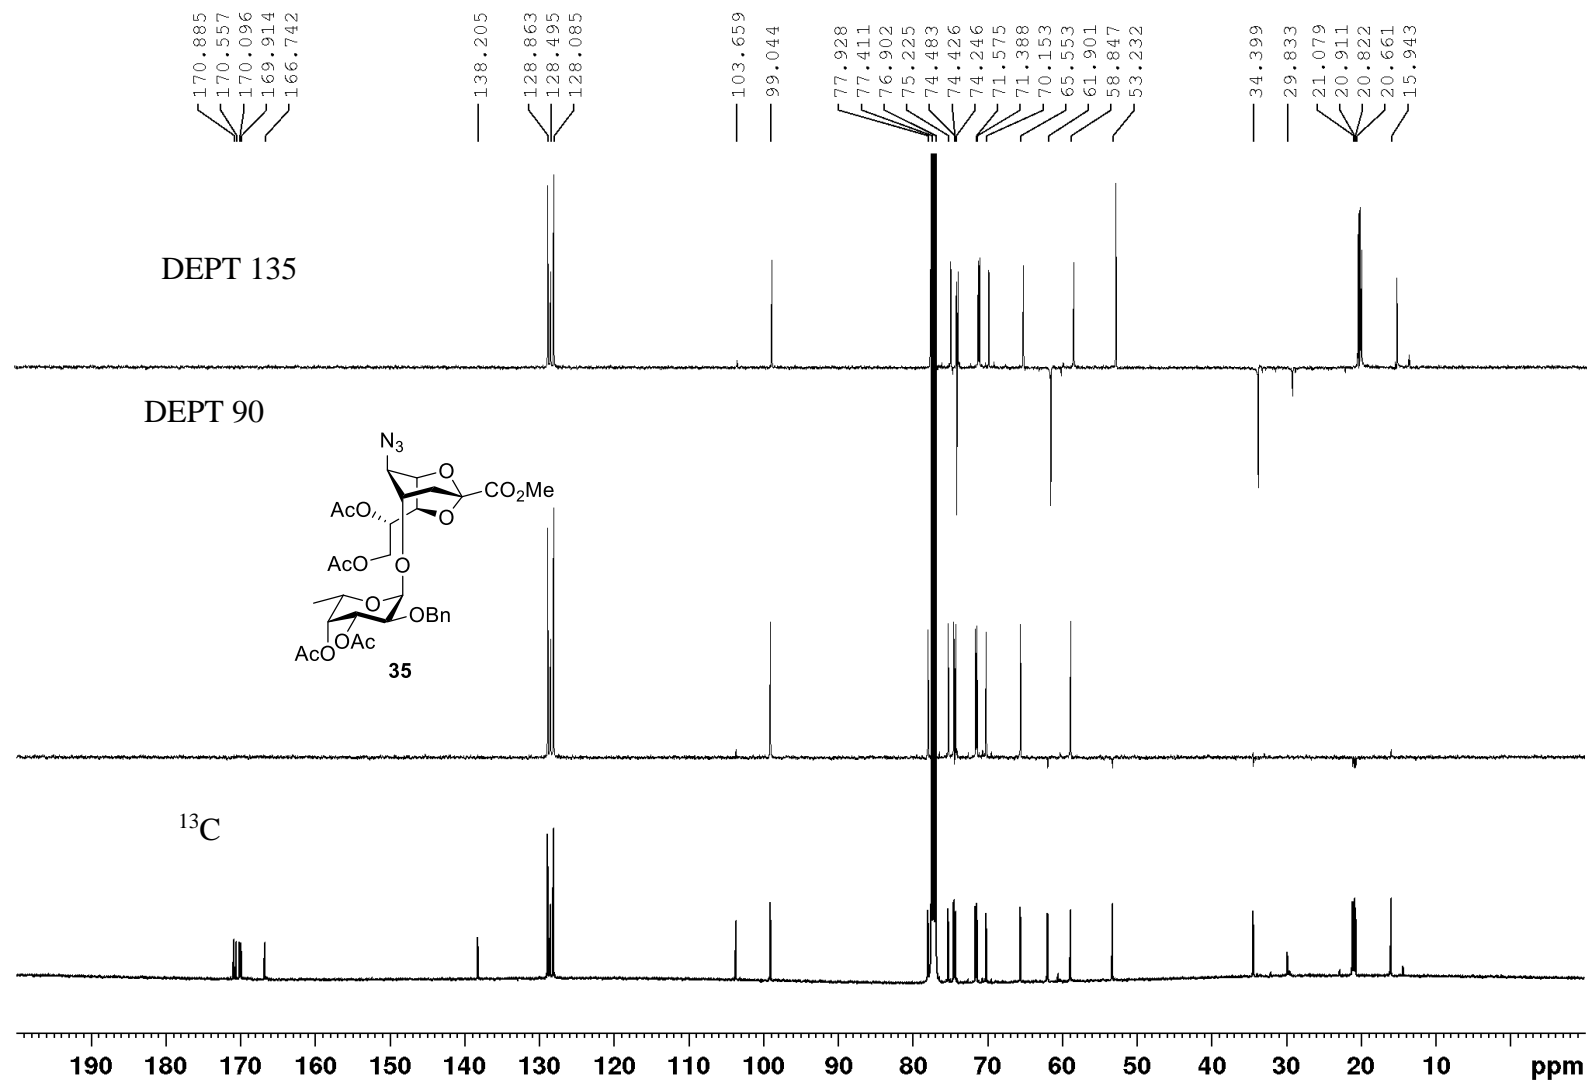

The <sup>13</sup>C NMR spectrum of compound **35**.

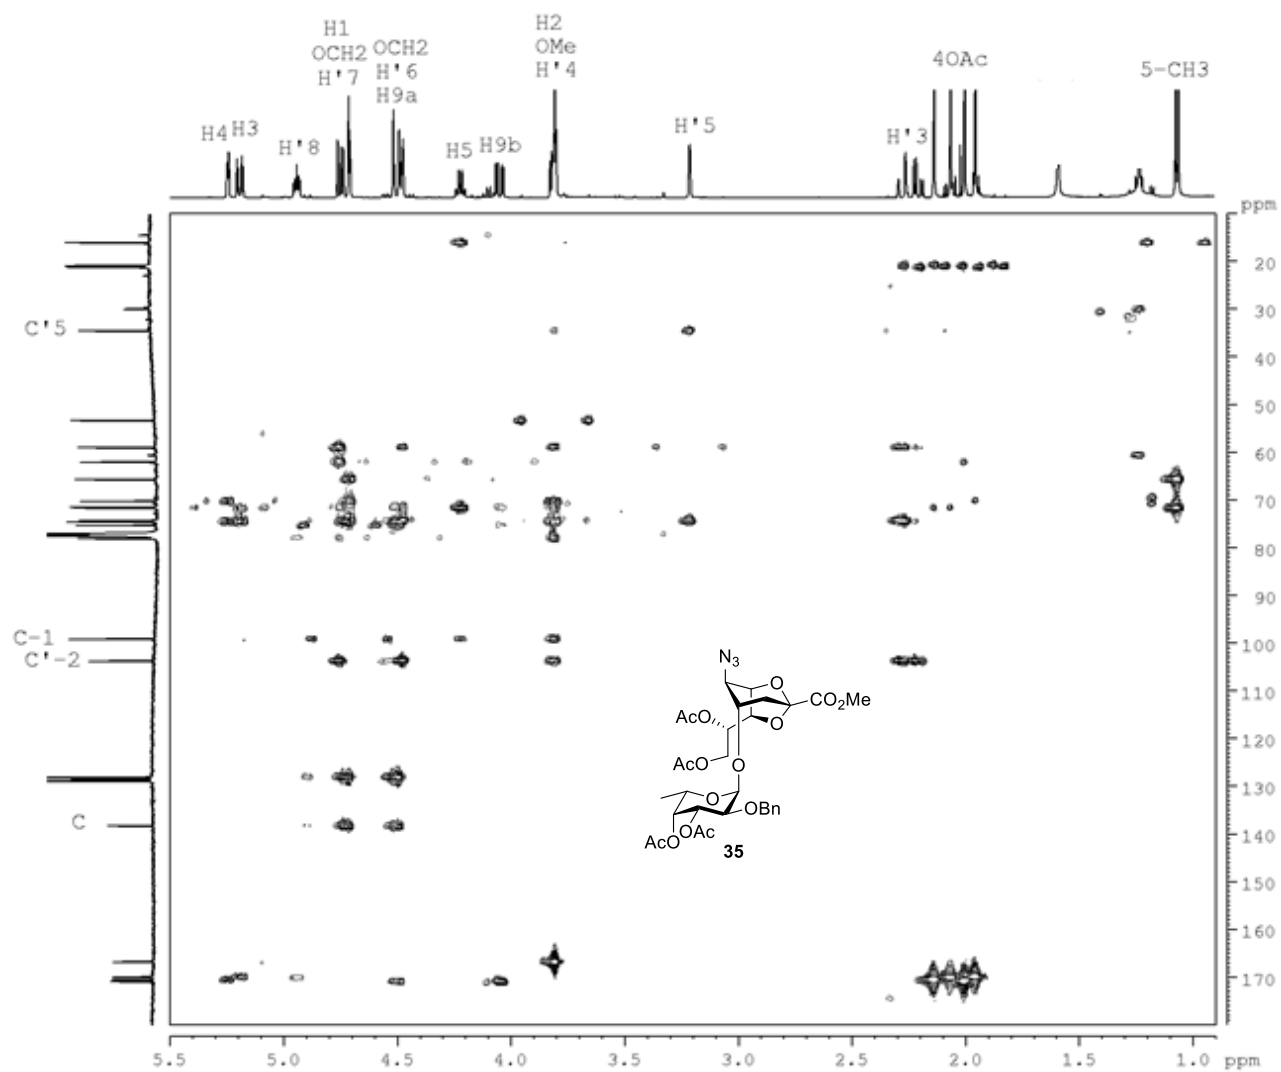

The HMBC NMR spectrum of compound **35**.



# Elemental Composition Report

Page 1

## Single Mass Analysis

Tolerance = 40.0 PPM / DBE: min = -1000.0, max = 1000.0

Element prediction: Off

Number of isotope peaks used for i-FIT = 2

Monoisotopic Mass, Even Electron Ions

35 formula(e) evaluated with 1 results within limits (all results (up to 1000) for each mass)

Elements Used:

C: 0-400 H: 0-1000 N: 3-3 O: 15-15 Na: 1-1

KHA 387 F30-35 N3 FucoDisac

KE267

0927\_KHA 387 F30-35 N3 FucoDisac 27 (0.970) Cm (27-1x10.000)

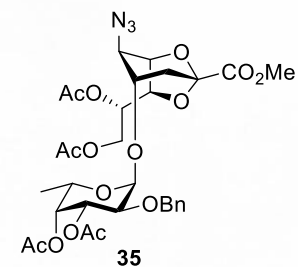

27-Sep-2017  
16:57:28  
1: TOF MS ES+  
5.46e+003

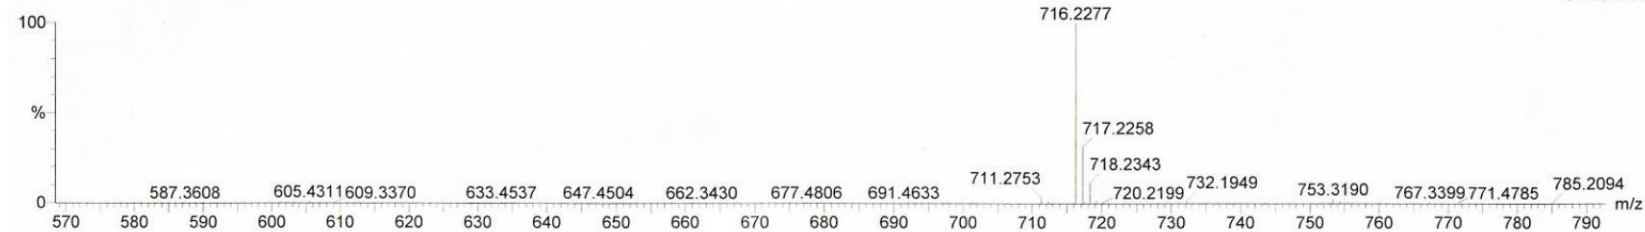

Minimum: -1000.0  
Maximum: 5.0 40.0 1000.0

| Mass     | Calc. Mass | mDa  | PPM  | DBE  | i-FIT | i-FIT (Norm) | Formula           |
|----------|------------|------|------|------|-------|--------------|-------------------|
| 716.2277 | 716.2279   | -0.2 | -0.3 | 13.5 | 22.7  | 0.0          | C31 H39 N3 O15 Na |

The HRMS spectrum of compound **35**.

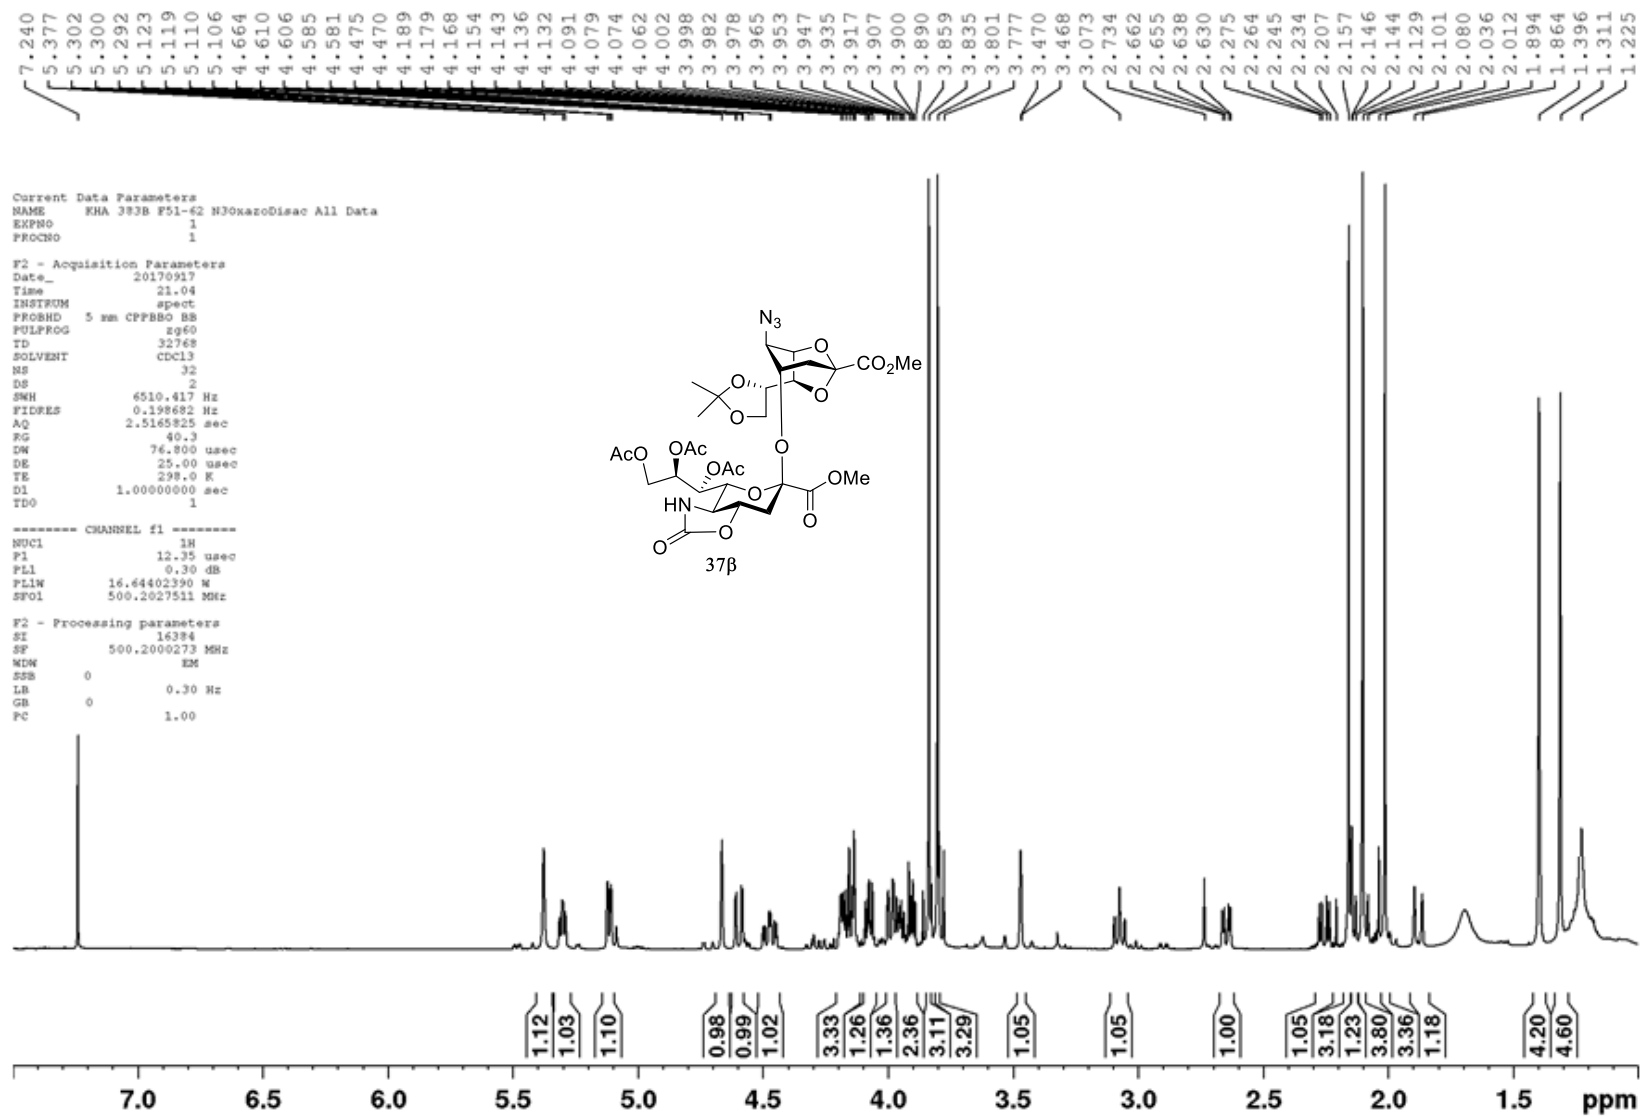

The <sup>1</sup>H NMR spectrum of compound **37β**.

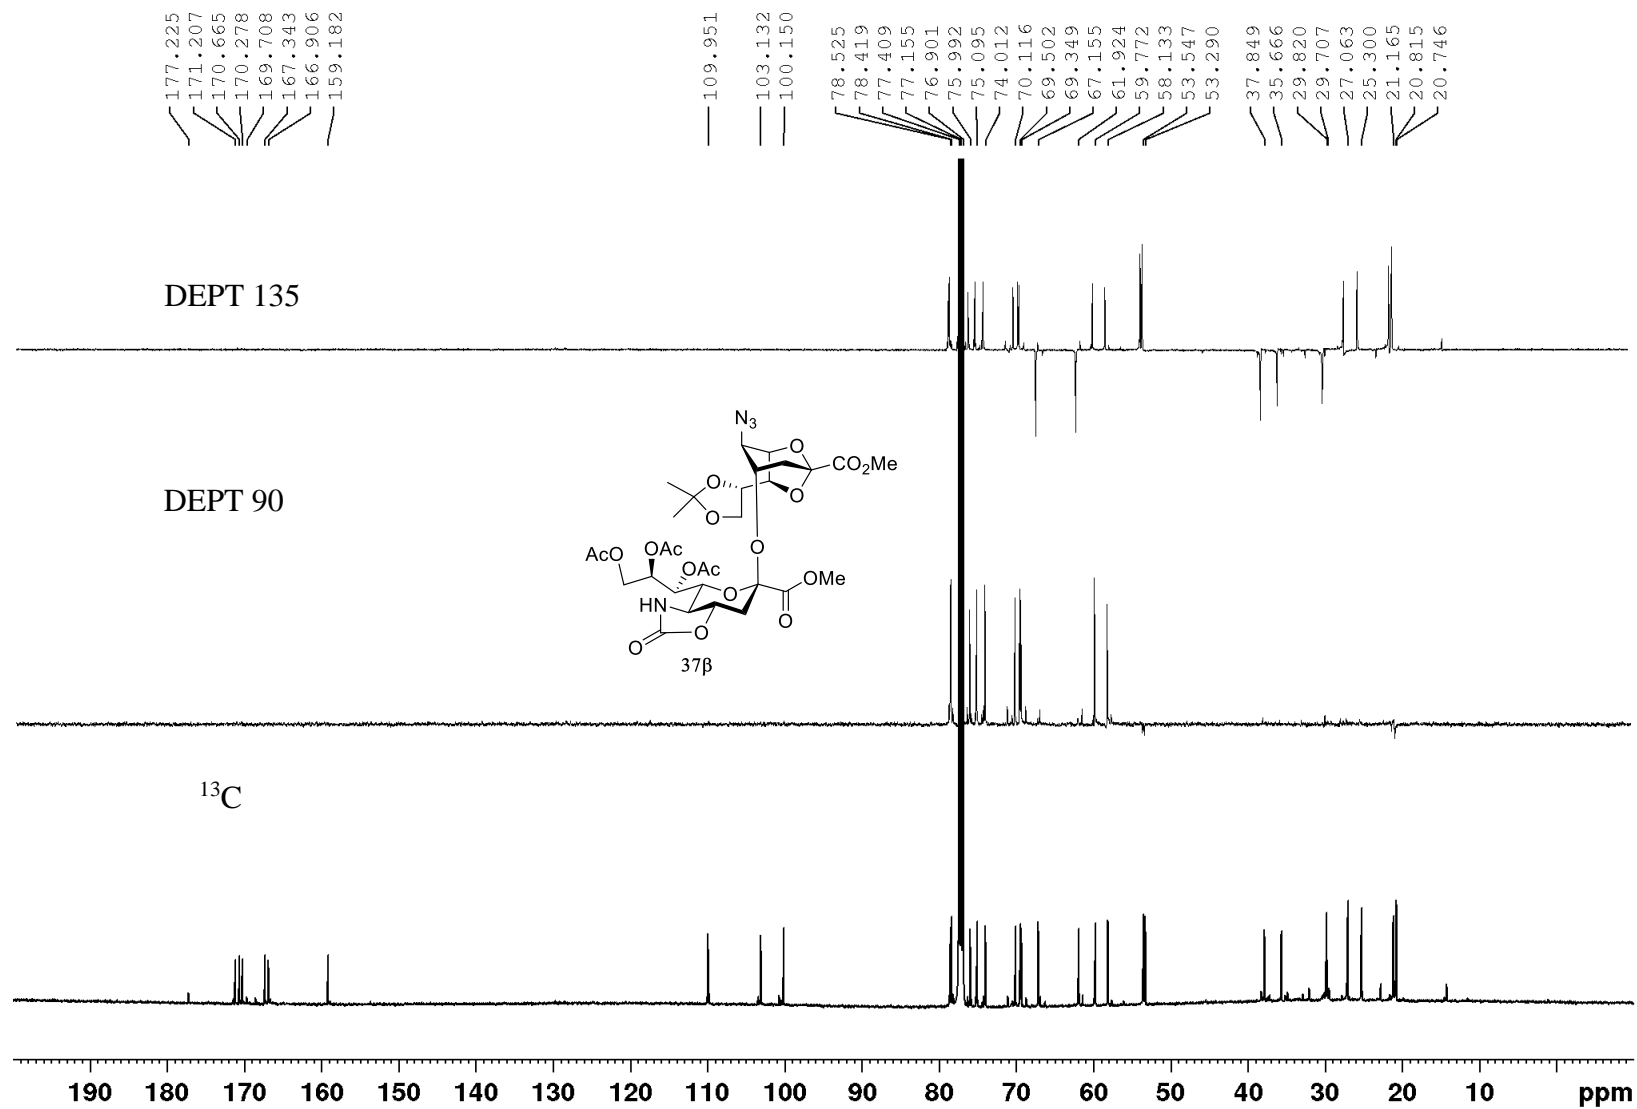

The  $^{13}\text{C}$  NMR spectrum of compound **37 $\beta$** .

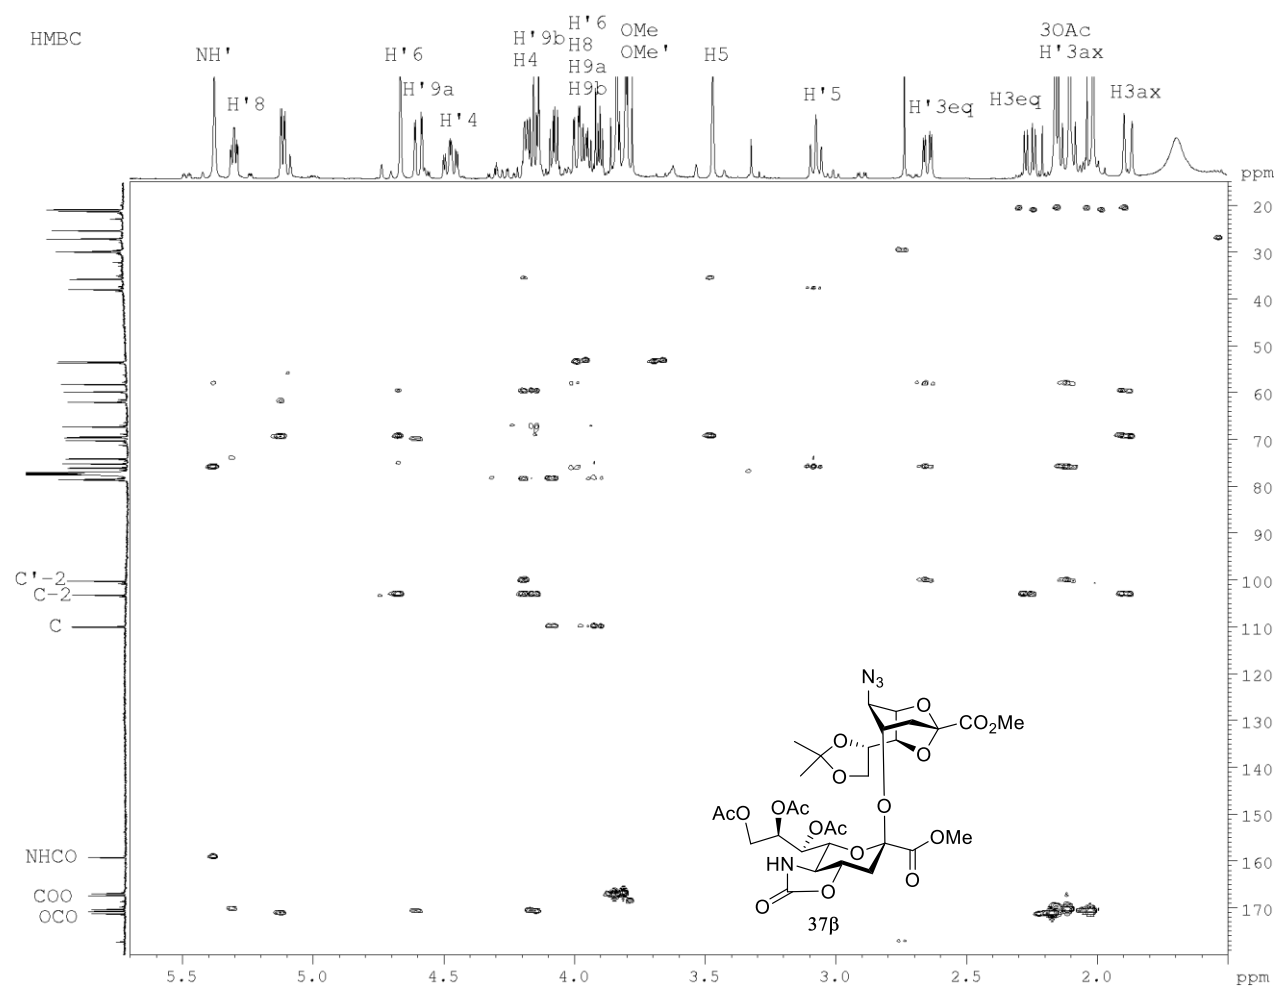

The HMBC NMR spectrum of compound **37β**.

## Elemental Composition Report

### Single Mass Analysis

Tolerance = 20.0 PPM / DBE: min = -1000.0, max = 1000.0

Element prediction: Off

Number of isotope peaks used for i-FIT = 2

Monoisotopic Mass, Even Electron Ions

34 formula(e) evaluated with 1 results within limits (all results (up to 1000) for each mass)

Elements Used:

C: 0-400 H: 0-1000 N: 4-4 O: 18-18 Na: 1-1

KHA 383 F44-52 N3NHDisac

0905\_KHA 383 F44-52 N3NHDisac 17 (0.629) Cm (17-6x10.000)

KE267

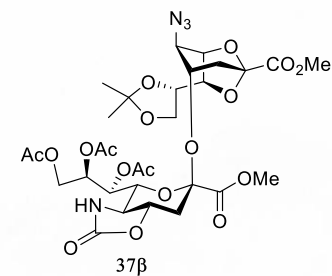

05-Sep-2017  
16:44:40  
1: TOF MS ES+  
4.15e+003

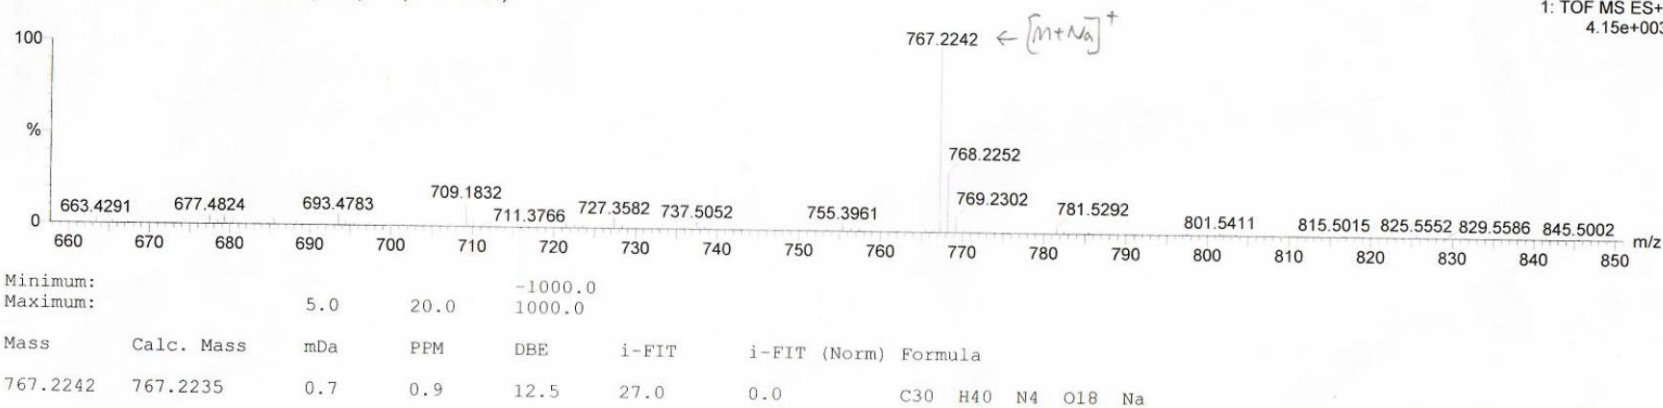

The HRMS spectrum of compound **37β**.

Current Data Parameters  
NAME KHA 383B F44-47  
EXPNO 1  
PROCNO 1

F2 - Acquisition Parameters  
Date\_ 20170913  
Time 14.04  
INSTRUM spect  
PROBHD 5 mm CPPBBO BB  
PULPROG zg60  
TD 32768  
SOLVENT CDCl3  
NS 16  
DS 2  
SWH 6510.417 Hz  
FIDRES 0.198682 Hz  
AQ 2.5165825 sec  
RG 114  
DW 76.800 usec  
DE 25.00 usec  
TE 298.0 K  
D1 1.00000000 sec  
TD0 1

\*\*\*\*\* CHANNEL f1 \*\*\*\*\*  
NUC1 1H  
P1 12.35 usec  
PL1 0.30 dB  
PL1W 16.64402390 W  
SFO1 500.2027511 MHz

F2 - Processing parameters  
SI 16384  
SF 500.2000209 MHz  
WDW EM  
SSB 0  
LB 0.30 Hz  
GB 0  
PC 1.00

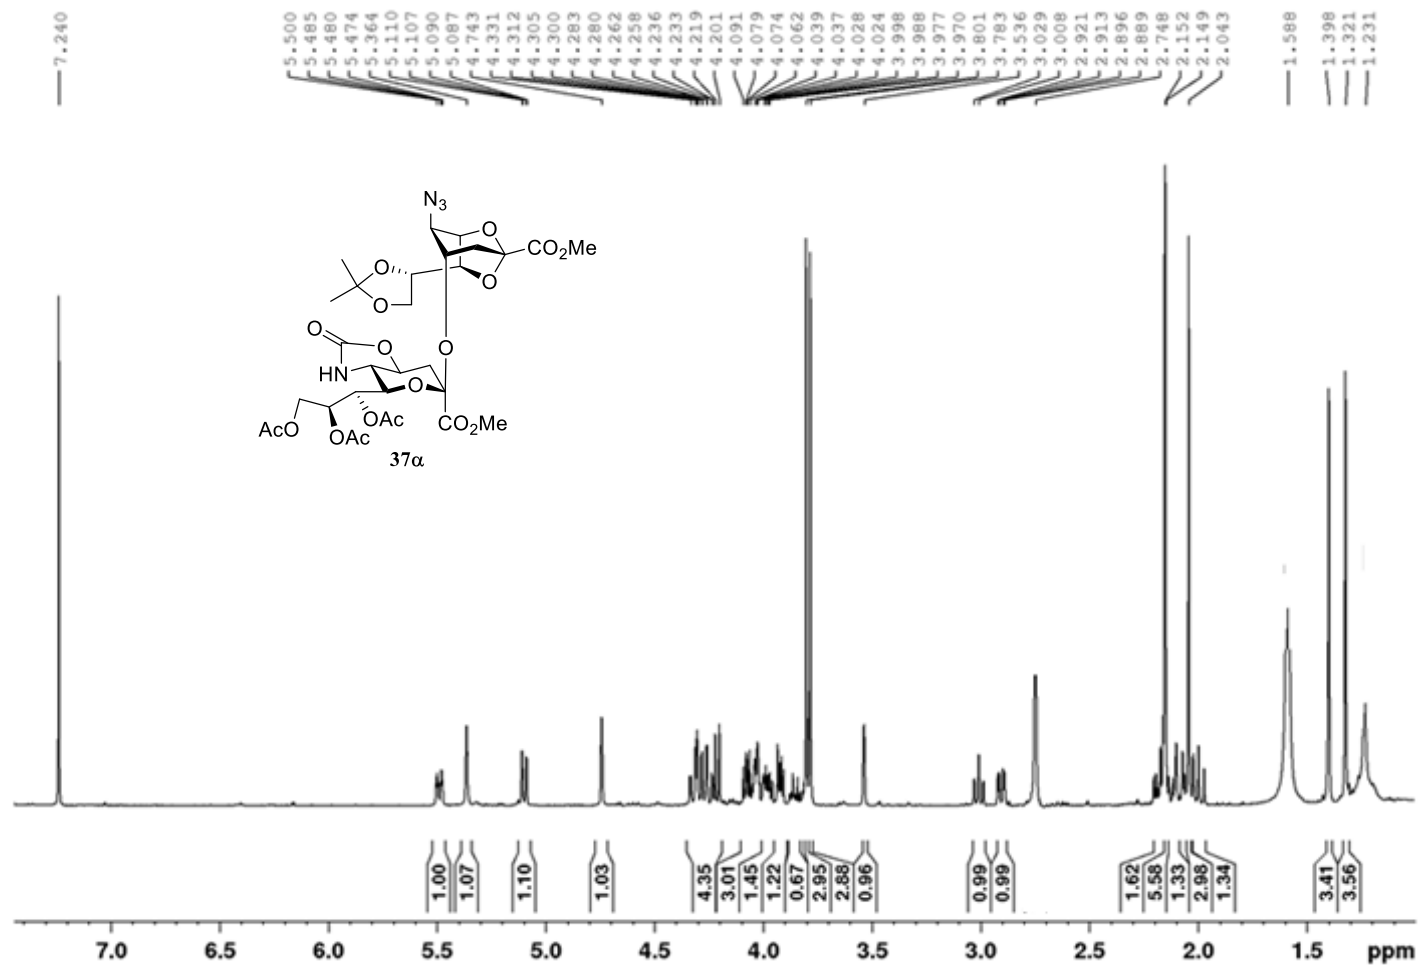

The <sup>1</sup>H NMR spectrum of compound **37a**.

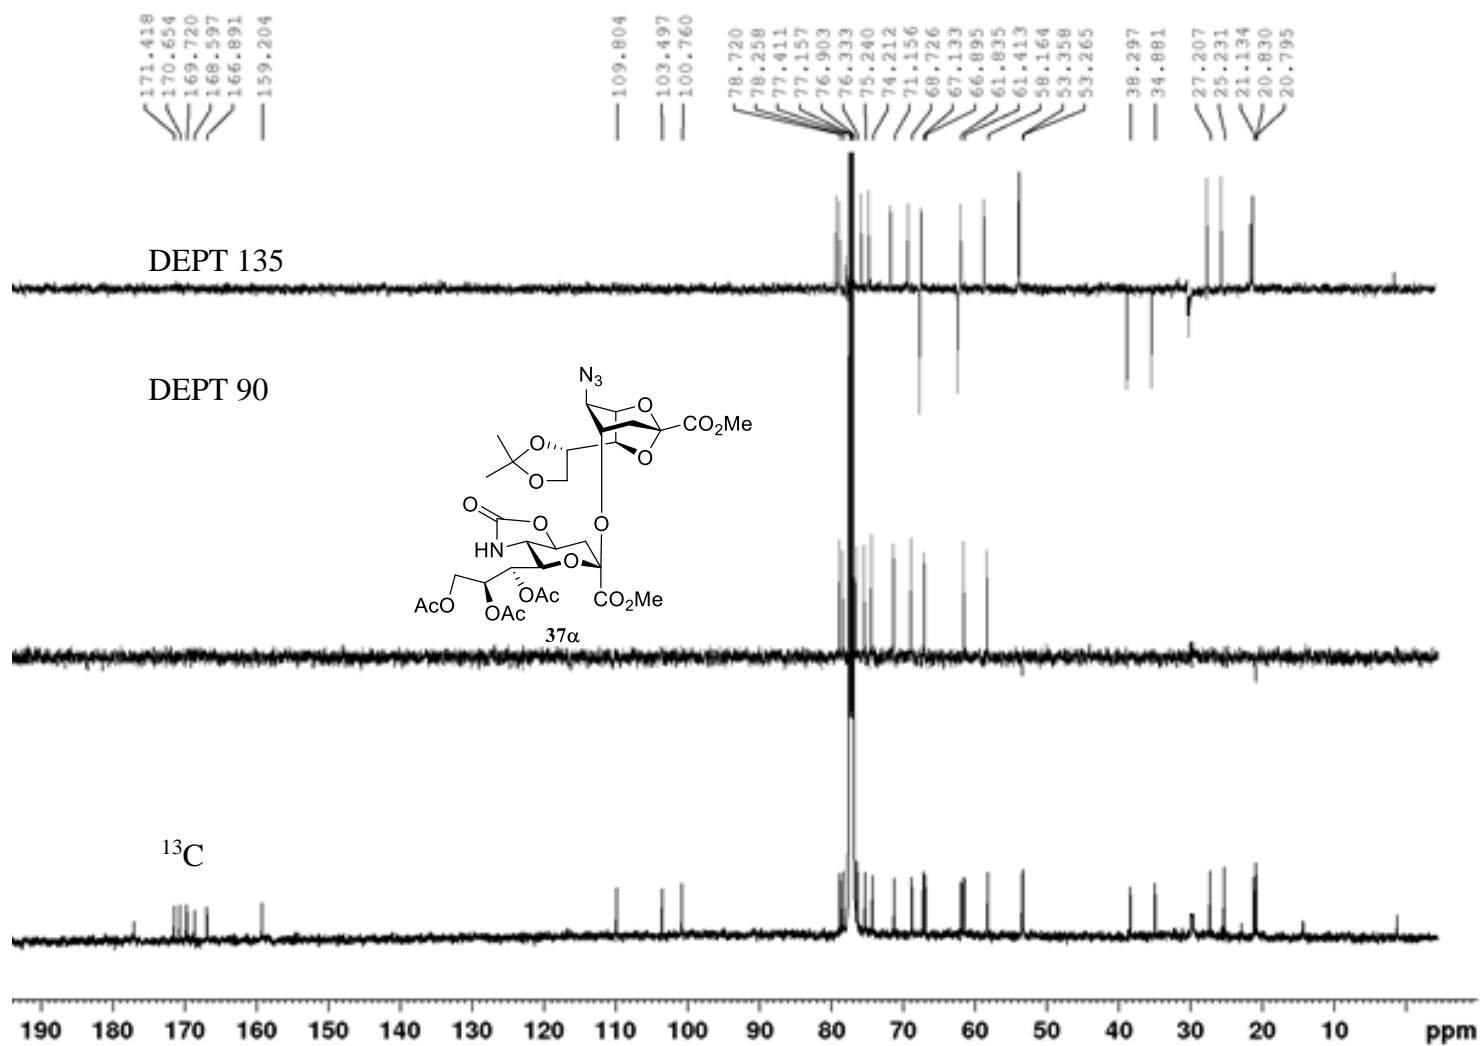

The  $^{13}\text{C}$  NMR spectrum of compound **37α**.

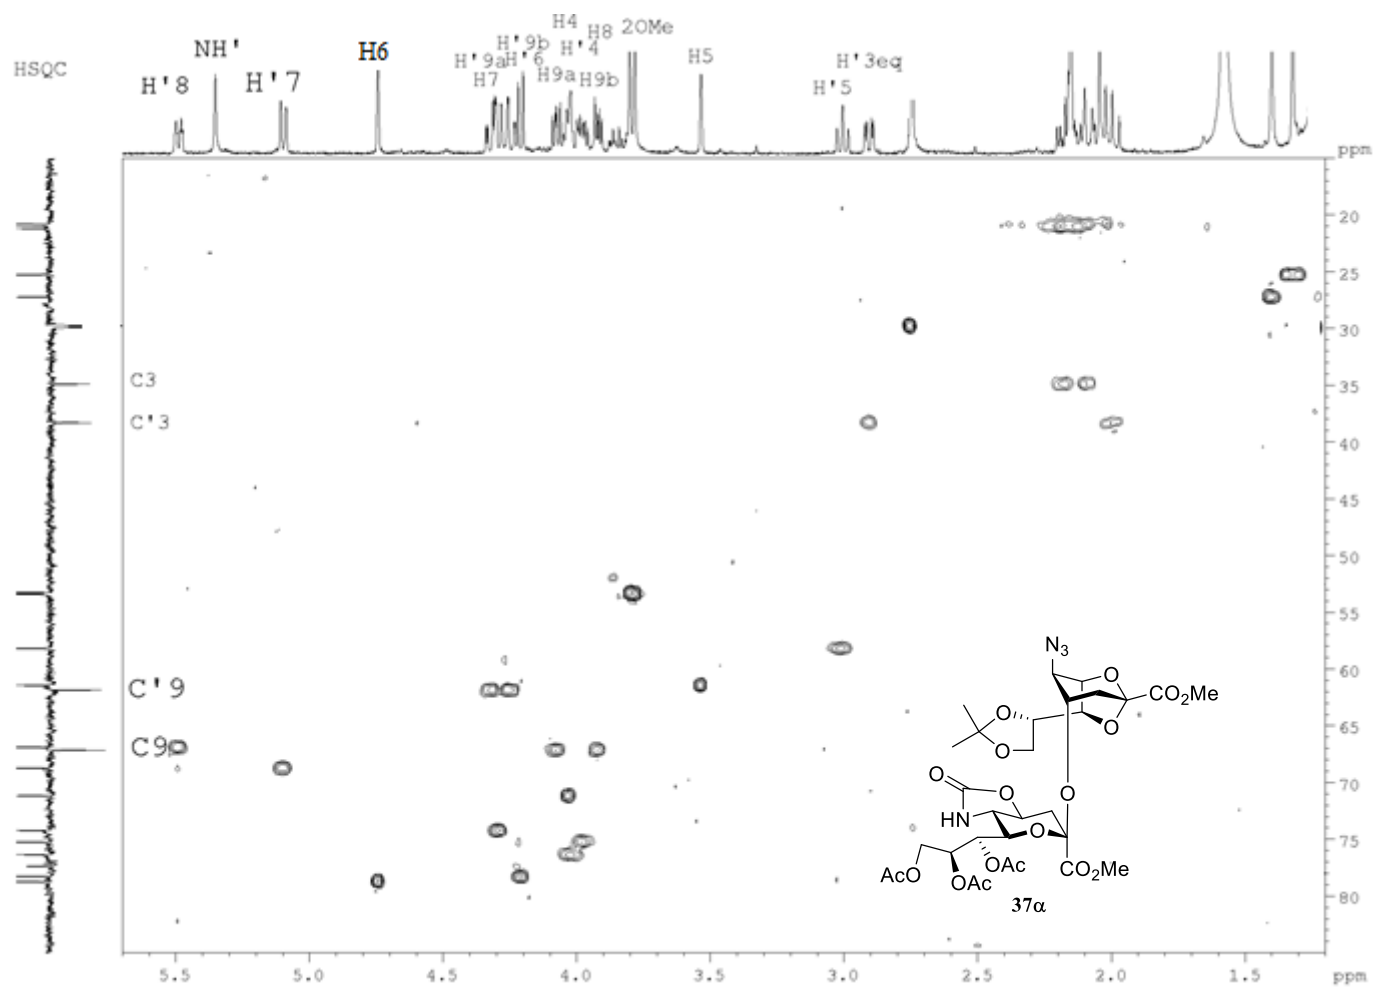

The HSQC NMR spectrum of compound **37α**.



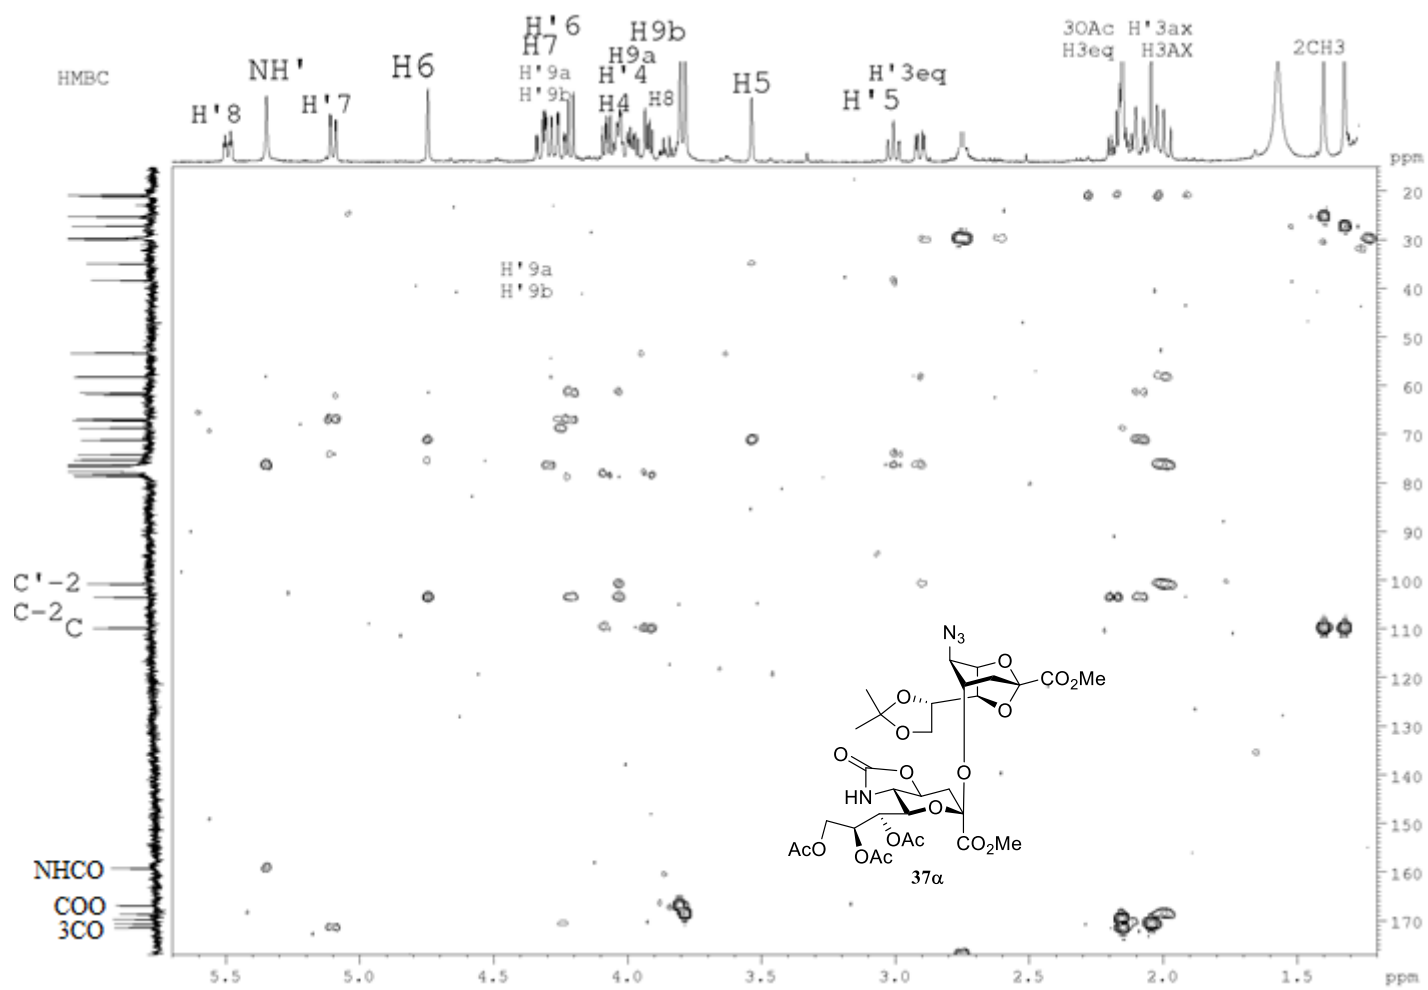

The HMBC NMR spectrum of compound **37α**.

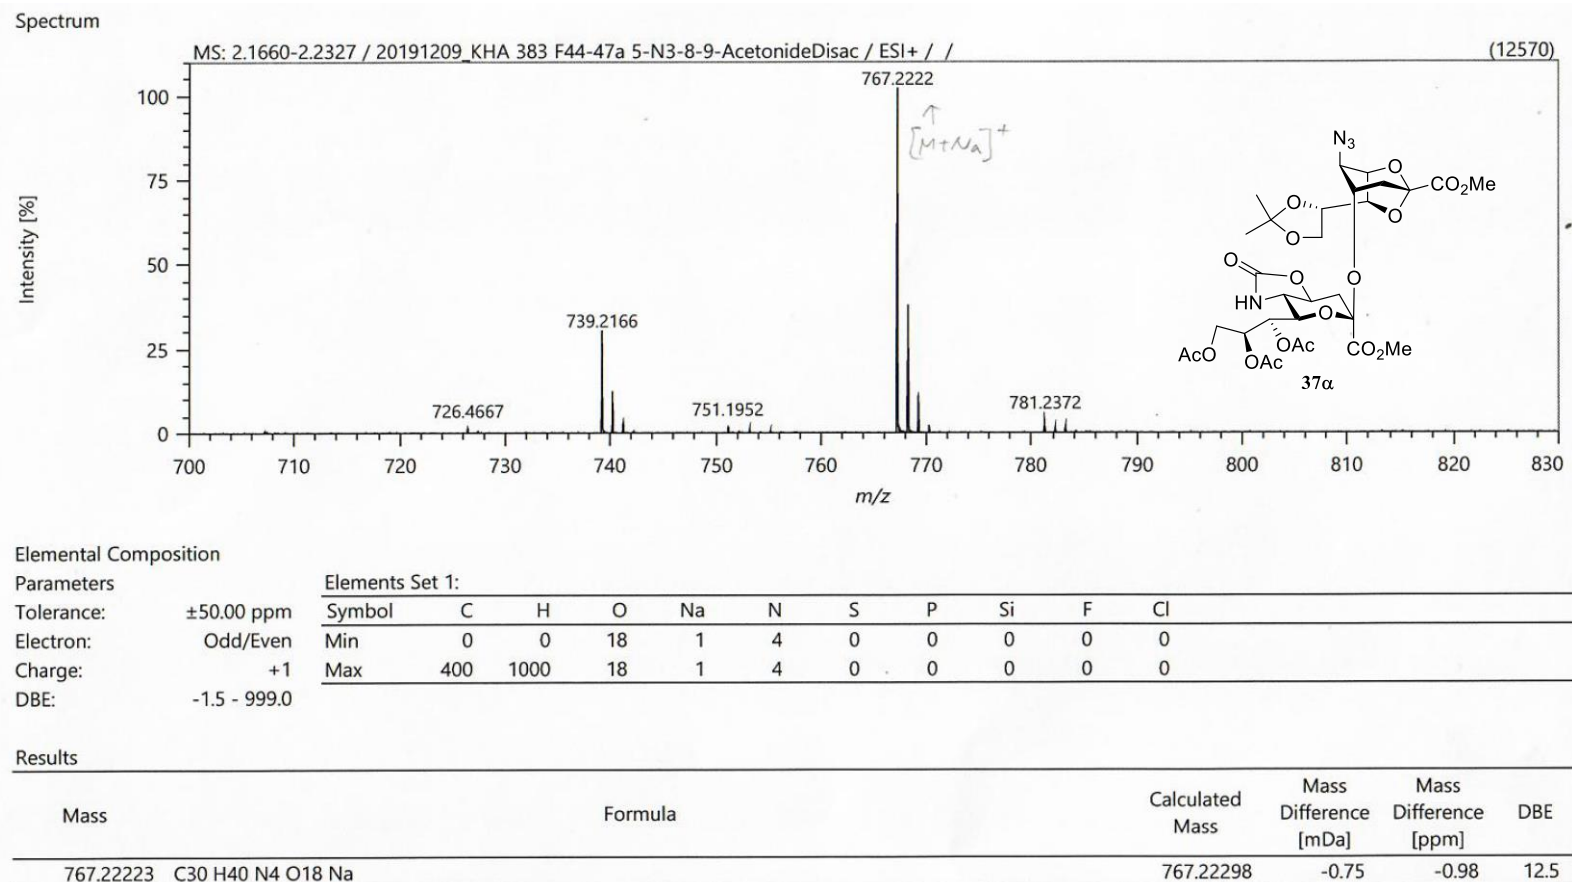

The HRMS spectrum of compound **37 $\alpha$** .

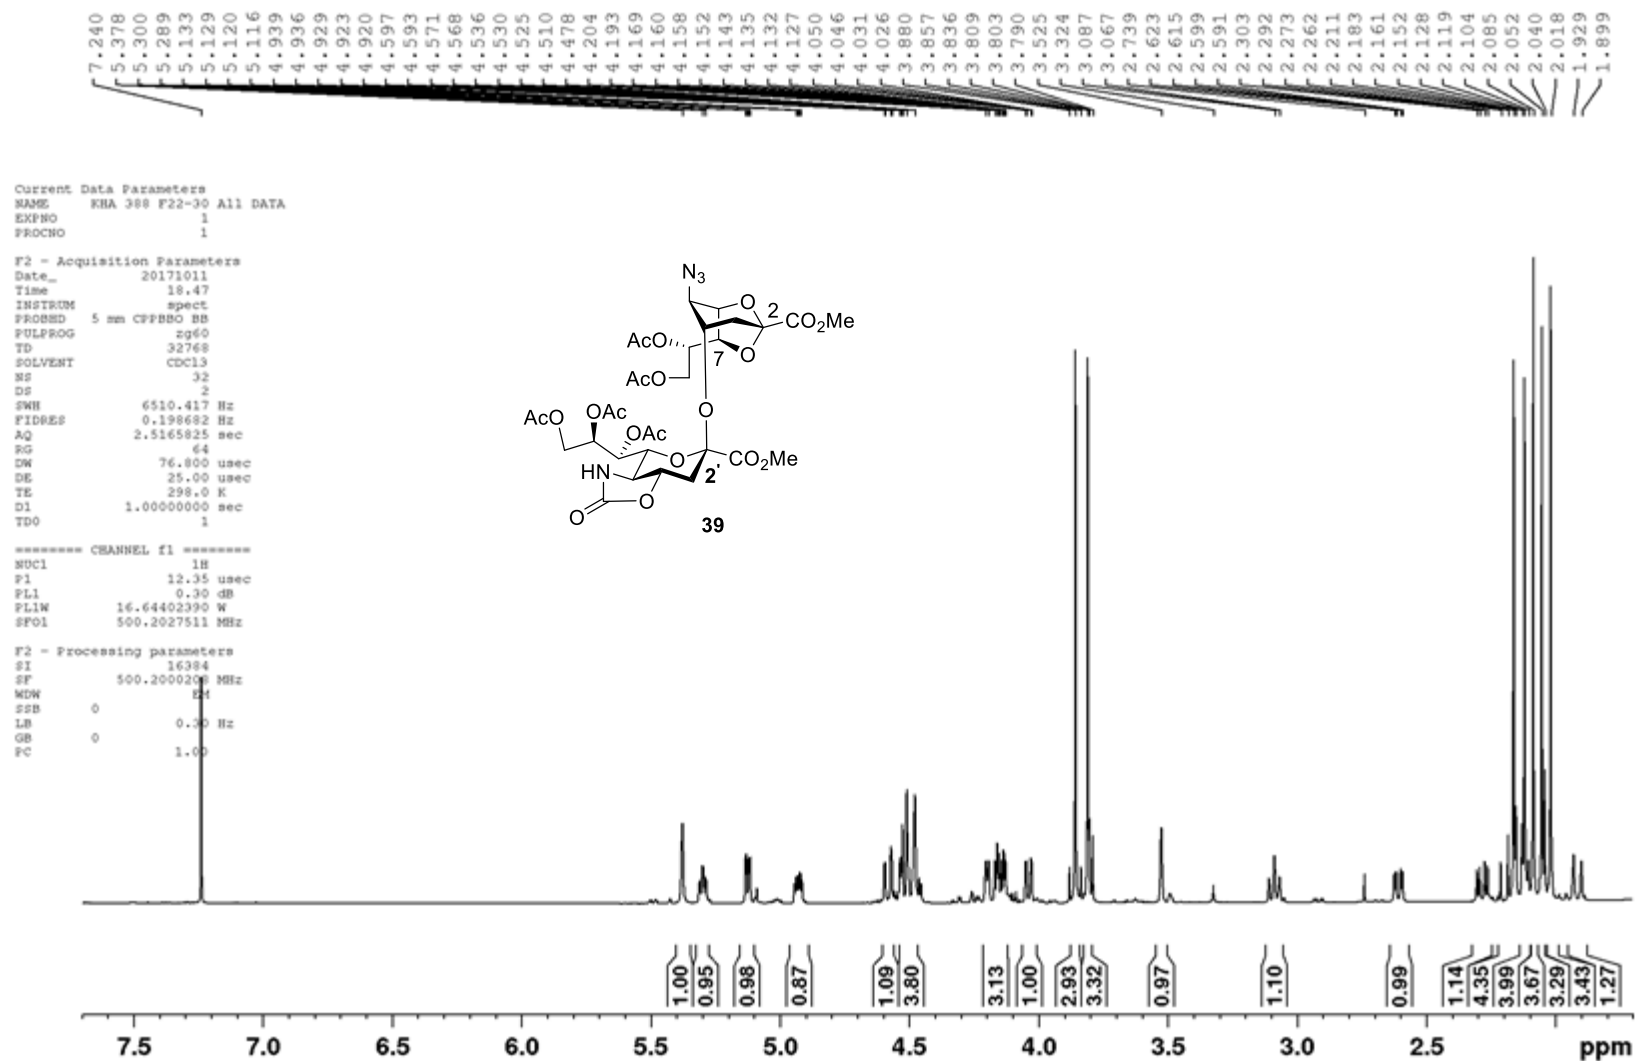

The <sup>1</sup>H NMR spectrum of compound **39**.

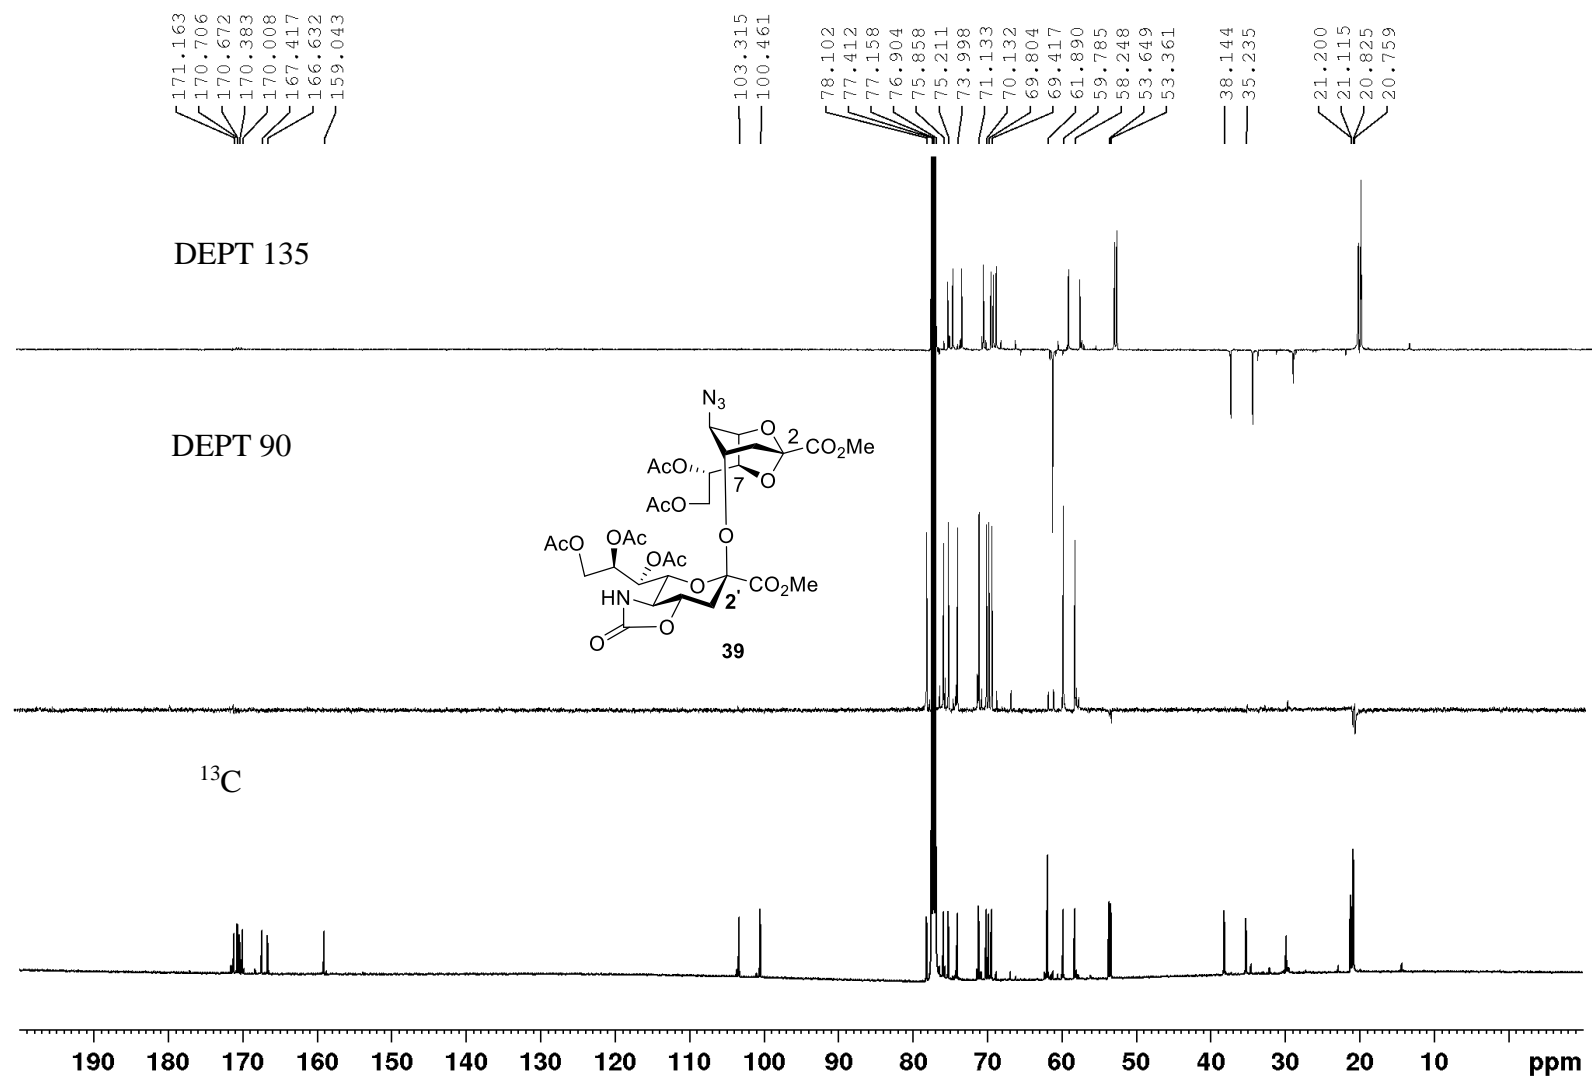

The <sup>13</sup>C NMR spectrum of compound **39**.

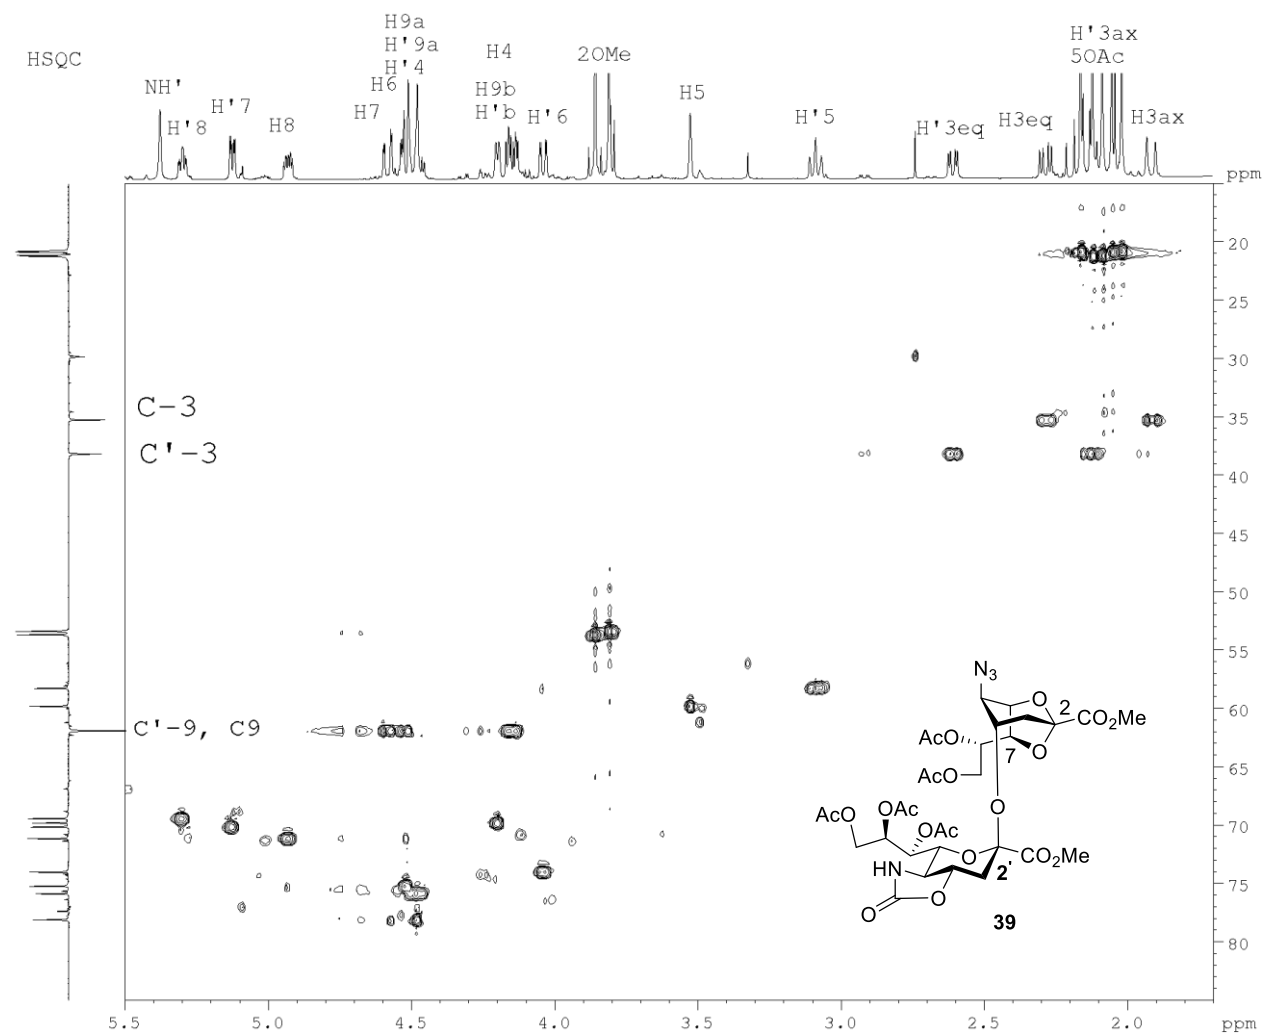

The HSQC NMR spectrum of compound **39**.

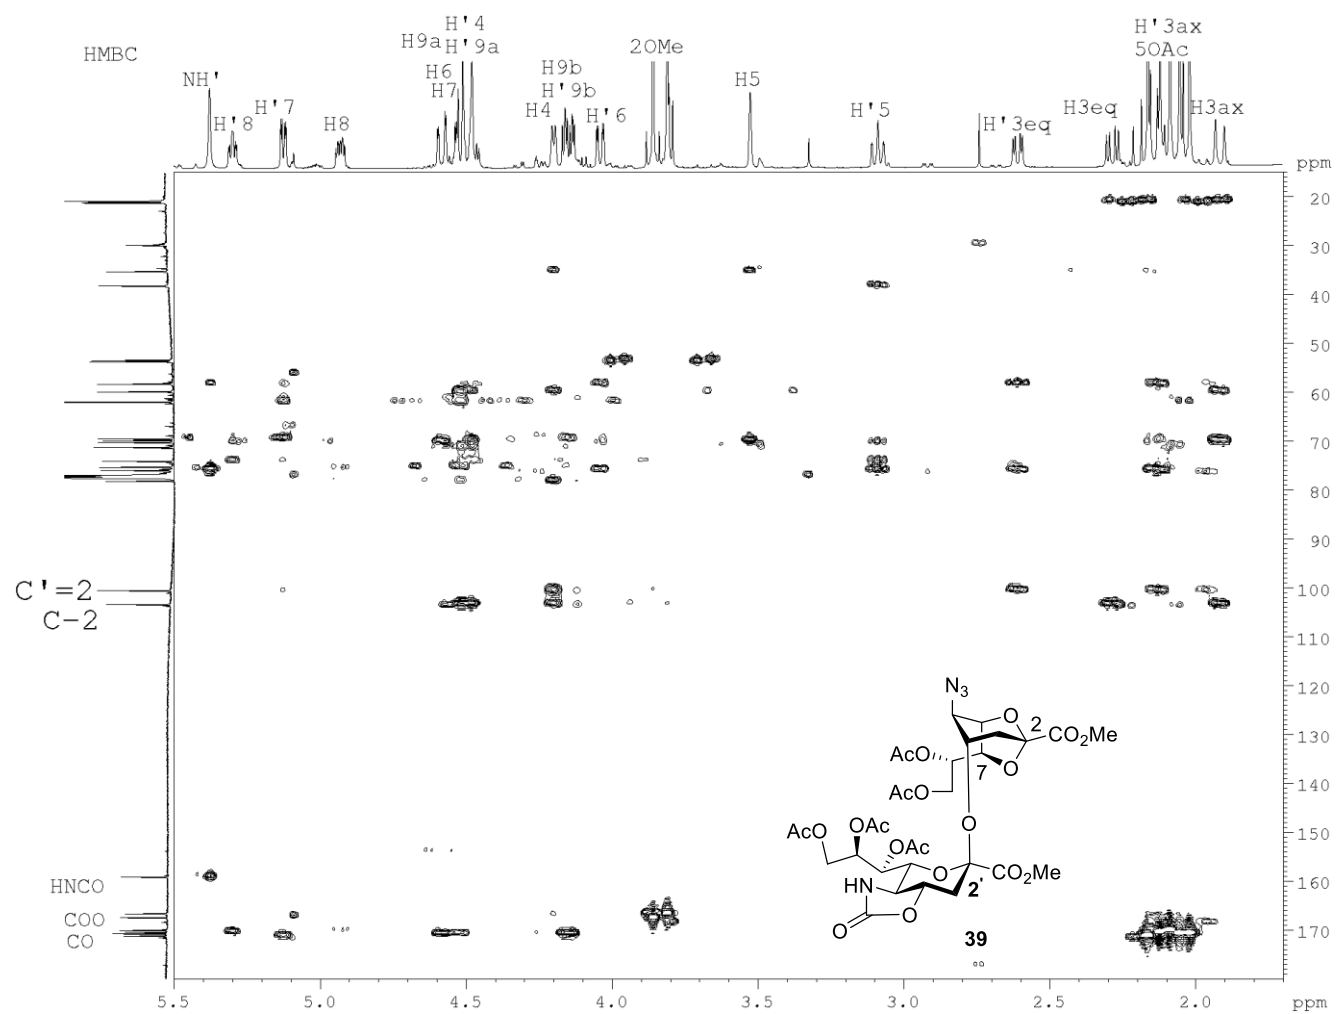

The HMBC NMR spectrum of compound **39**.

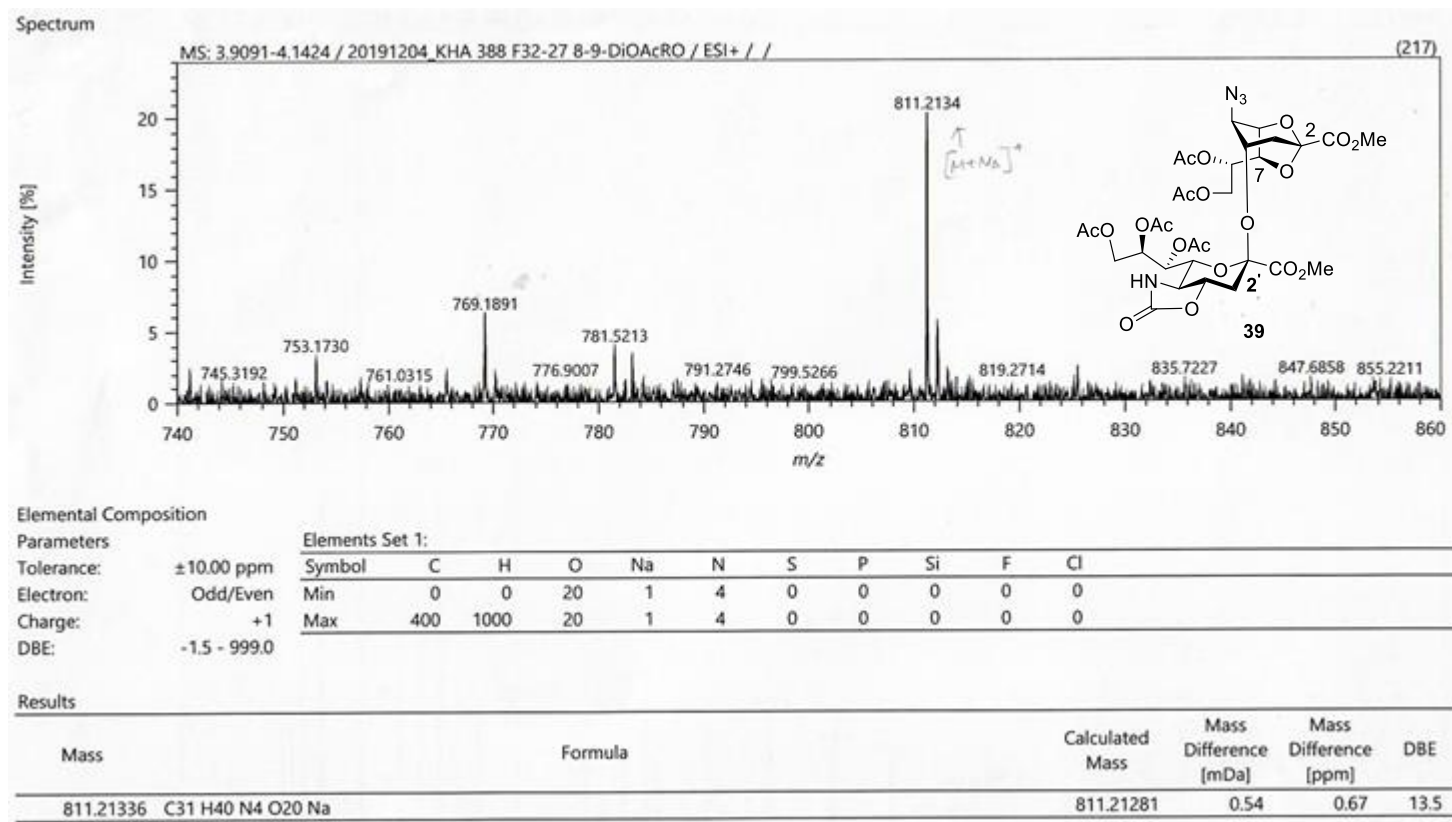

The HRMS spectrum of compound **39**.

## References

1. Crich, D.; Wenju, L. *J. Org. Chem.* **2007**, *72*, 2387–2391. doi:10.1021/jo062431r
